# Supplementary material for: Cross-coupling reaction of cyclic quaternary ammonium salts with arylzinc reagents, arylboron reagents, and silylboronates
Source: Royal Society of Chemistry journal article supplement (doi:10.1039/d4ob01790k), 2025-01-01

# Cross-coupling reaction of cyclic quaternary ammonium salts with arylzinc reagents, arylboron reagents, and silylboronate

Hong-Xia Jiang and Zhong-Xia Wang\*

CAS Key Laboratory of Soft Matter Chemistry and Department of Chemistry, University of Science and Technology of China, Hefei, Anhui 230026, P. R. China.

## Contents

|                                                                                                                                                         |    |
|---------------------------------------------------------------------------------------------------------------------------------------------------------|----|
| 1. Screening of reaction conditions                                                                                                                     | S2 |
| (1) Condition optimization of the reaction of cyclic quaternary ammonium salts with arylzinc reagents                                                   | S2 |
| (2) Condition optimization of the reaction of cyclic quaternary ammonium salts with arylboron reagents                                                  | S5 |
| (3) Condition optimization of the reaction of cyclic quaternary ammonium salts with dimethyl(phenyl)(4,4,5,5-tetramethyl-1,3,2-dioxaborolan-2-yl)silane | S6 |
| 2. Detection of $\text{PhSiMe}_3$                                                                                                                       | S7 |
| 3. Spectral copies of the products                                                                                                                      | S7 |

## 1. Screening of reaction conditions

(1) Condition optimization of the reaction of cyclic quaternary ammonium salts with arylzinc reagents

Table S1. Optimization of conditions for the reaction of cyclic quaternary ammonium salt (**1a**) with phenylzinc chloride (**2a**)<sup>a</sup>

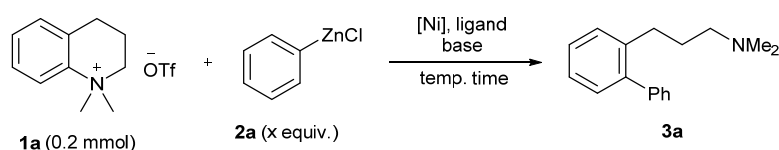

| Entry | [Ni] (mol%)                                                         | Ligand (mol%)         | x   | Temp. (°C) | Time (h) | Solvent (2 mL) | Base (10 mol%) | Yield <sup>b</sup> (%) |
|-------|---------------------------------------------------------------------|-----------------------|-----|------------|----------|----------------|----------------|------------------------|
| 1     | NiCl <sub>2</sub> (DME) (10)                                        |                       | 2.0 | 80         | 12       | THF            |                | 19                     |
| 2     | NiCl <sub>2</sub> (TMEDA) · 0.2CH <sub>2</sub> Cl <sub>2</sub> (10) |                       | 2.0 | 80         | 12       | THF            |                | 33                     |
| 3     | Ni(acac) <sub>2</sub> (10)                                          |                       | 2.0 | 80         | 12       | THF            |                | 18                     |
| 4     | NiCl <sub>2</sub> (PPh <sub>3</sub> ) <sub>3</sub> (10)             |                       | 2.0 | 80         | 12       | THF            |                | 15                     |
| 5     | NiCl <sub>2</sub> (PCy <sub>3</sub> ) <sub>2</sub> (10)             |                       | 2.0 | 80         | 12       | THF            |                | 27                     |
| 6     | NiCl <sub>2</sub> (dppe) (10)                                       |                       | 2.0 | 80         | 12       | THF            |                | 35                     |
| 7     | NiCl <sub>2</sub> (dppp) (10)                                       |                       | 2.0 | 80         | 12       | THF            |                | 15                     |
| 8     | NiCl <sub>2</sub> (dppf) (10)                                       |                       | 2.0 | 80         | 12       | THF            |                | 20                     |
| 9     | NiF <sub>2</sub> (10)                                               |                       | 2.0 | 80         | 12       | THF            |                | 15                     |
| 10    | Ni(OTf) <sub>2</sub> (10)                                           |                       | 2.0 | 80         | 12       | THF            |                | 41                     |
| 11    | Ni(COD) <sub>2</sub> (10)                                           |                       | 2.0 | 80         | 12       | THF            |                | trace                  |
| 12    | Ni(OTf) <sub>2</sub> (10)                                           | PPh <sub>3</sub> (20) | 2.0 | 80         | 12       | THF            |                | 7                      |
| 13    | Ni(OTf) <sub>2</sub> (10)                                           | X-Phos (20)           | 2.0 | 80         | 12       | THF            |                | 40                     |
| 14    | Ni(OTf) <sub>2</sub> (10)                                           | dppm (10)             | 2.0 | 80         | 12       | THF            |                | 12                     |
| 15    | Ni(OTf) <sub>2</sub> (10)                                           | dppe (10)             | 2.0 | 80         | 12       | THF            |                | 70                     |
| 16    | Ni(OTf) <sub>2</sub> (10)                                           | dppf (10)             | 2.0 | 80         | 12       | THF            |                | 33                     |
| 17    | Ni(OTf) <sub>2</sub> (10)                                           | IPr·HCl (10)          | 2.0 | 80         | 12       | THF            |                | 70                     |
| 18    | Ni(OTf) <sub>2</sub> (10)                                           | IMes·HCl(10)          | 2.0 | 80         | 12       | THF            |                | 64                     |
| 19    | Ni(OTf) <sub>2</sub> (10)                                           | SIMes·HCl (10)        | 2.0 | 80         | 12       | THF            |                | 64                     |
| 20    | Ni(OTf) <sub>2</sub> (10)                                           | SIPr·HCl (10)         | 2.0 | 80         | 12       | THF            |                | 50                     |
| 21    | Ni(OTf) <sub>2</sub> (5)                                            | IPr·HCl (10)          | 2.0 | 80         | 12       | THF            |                | 48                     |
| 22    | Ni(OTf) <sub>2</sub> (10)                                           | IPr·HCl (20)          | 2.0 | 80         | 12       | THF            |                | 36                     |
| 23    | Ni(OTf) <sub>2</sub> (10)                                           | IPr·HCl (10)          | 1.5 | 80         | 12       | THF            |                | 25                     |

|    |                           |              |     |     |    |         |                                 |                       |
|----|---------------------------|--------------|-----|-----|----|---------|---------------------------------|-----------------------|
| 24 | Ni(OTf) <sub>2</sub> (10) | IPr·HCl (10) | 2.5 | 80  | 12 | THF     |                                 | 75                    |
| 25 | Ni(OTf) <sub>2</sub> (10) | IPr·HCl (10) | 3.0 | 80  | 12 | THF     |                                 | 65                    |
| 26 | Ni(OTf) <sub>2</sub> (10) | IPr·HCl (10) | 2.5 | 70  | 12 | THF     |                                 | 73                    |
| 27 | Ni(OTf) <sub>2</sub> (10) | IPr·HCl (10) | 2.5 | 90  | 12 | THF     |                                 | 81                    |
| 28 | Ni(OTf) <sub>2</sub> (10) | IPr·HCl (10) | 2.5 | 100 | 12 | THF     |                                 | 78                    |
| 29 | Ni(OTf) <sub>2</sub> (10) | IPr·HCl (10) | 2.5 | 90  | 10 | THF     |                                 | 73                    |
| 30 | Ni(OTf) <sub>2</sub> (10) | IPr·HCl (10) | 2.5 | 90  | 14 | THF     |                                 | 83                    |
| 31 | Ni(OTf) <sub>2</sub> (10) | IPr·HCl (10) | 2.5 | 90  | 16 | THF     |                                 | 90                    |
| 32 | Ni(OTf) <sub>2</sub> (10) | IPr·HCl (10) | 2.5 | 90  | 18 | THF     |                                 | 90                    |
| 33 | Ni(OTf) <sub>2</sub> (10) | IPr·HCl (10) | 2.5 | 90  | 16 | dioxane |                                 | 30                    |
| 34 | Ni(OTf) <sub>2</sub> (10) | IPr·HCl (10) | 2.5 | 90  | 16 | toluene |                                 | nr                    |
| 35 | Ni(OTf) <sub>2</sub> (10) | IPr·HCl (10) | 2.5 | 90  | 16 | NMP     |                                 | 46                    |
| 36 | Ni(OTf) <sub>2</sub> (10) | IPr·HCl (10) | 2.5 | 90  | 16 | DMF     |                                 | 5                     |
| 37 | Ni(OTf) <sub>2</sub> (10) | IPr·HCl (10) | 2.5 | 90  | 16 | DME     |                                 | 25                    |
| 38 | Ni(OTf) <sub>2</sub> (5)  | IPr·HCl (5)  | 2.5 | 90  | 16 | THF     |                                 | 65                    |
| 39 | Ni(OTf) <sub>2</sub> (10) | IPr·HCl (10) | 2.5 | 90  | 16 | THF     | NaH                             | 82                    |
| 40 | Ni(OTf) <sub>2</sub> (10) | IPr·HCl (10) | 2.5 | 90  | 16 | THF     | NaOtBu                          | 85                    |
| 41 | Ni(OTf) <sub>2</sub> (10) | IPr·HCl (10) | 2.5 | 90  | 16 | THF     | LiOtBu                          | 86                    |
| 42 | Ni(OTf) <sub>2</sub> (10) | IPr·HCl (10) | 2.5 | 90  | 16 | THF     | Cs <sub>2</sub> CO <sub>3</sub> | 95                    |
| 43 | Ni(OTf) <sub>2</sub> (10) | IPr·HCl (10) | 2.5 | 90  | 16 | THF     | K <sub>2</sub> CO <sub>3</sub>  | 95                    |
| 44 | Ni(OTf) <sub>2</sub> (10) | IPr·HCl (10) | 2.5 | 90  | 16 | THF     | K <sub>3</sub> PO <sub>4</sub>  | 88                    |
| 45 | Ni(OTf) <sub>2</sub> (10) | IPr·HCl (10) | 2.5 | 90  | 16 | THF     | CsF                             | 82                    |
| 46 | Ni(OTf) <sub>2</sub> (10) | IPr·HCl (10) | 2.5 | 90  | 16 | THF     | DBu                             | 95 (93 <sup>c</sup> ) |
| 47 | none                      | IPr·HCl (10) | 2.5 | 90  | 16 | THF     | DBu                             | np                    |

<sup>a</sup> Preparation method of PhZnCl: PhMgBr + ZnCl<sub>2</sub> + 2 LiCl. <sup>b</sup> NMR yields using 1,1,2,2-tetrachloroethane as an internal standard. <sup>c</sup> Isolated yields.

Table S2. Preparation method of PhZnCl

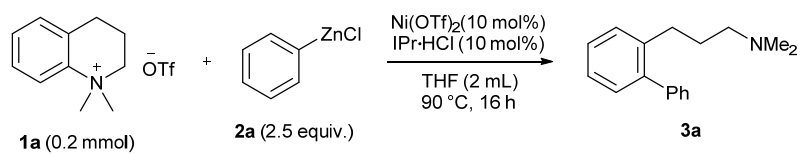

| Entry | Preparation method of ArZnCl                        | Yield (%) |
|-------|-----------------------------------------------------|-----------|
| 1     | PhMgBr + ZnCl <sub>2</sub>                          | 19        |
| 2     | PhMgBr + ZnCl <sub>2</sub> + LiCl                   | 75        |
| 3     | PhMgBr + ZnCl <sub>2</sub> + 2 LiCl                 | 90        |
| 4     | PhMgBr + ZnCl <sub>2</sub> + 3 LiCl                 | 68        |
| 5     | PhLi + ZnCl <sub>2</sub>                            | 40        |
| 6     | PhLi + ZnCl <sub>2</sub> + MgCl <sub>2</sub>        | trace     |
| 7     | PhLi + ZnCl <sub>2</sub> + MgCl <sub>2</sub> + LiCl | trace     |

Reaction of 1,1-dimethyl-1,2,3,4-tetrahydroquinolin-1-ium iodide

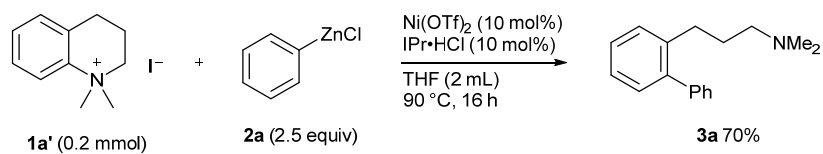

(2) Condition optimization of the reaction of cyclic quaternary ammonium salts with arylboron reagents

Table S3. Optimization of conditions for the reaction of quaternary ammonium salt (**1a**) with 4,4,5,5-tetramethyl-2-phenyl-1,3,2-dioxaborolane (**4a**)

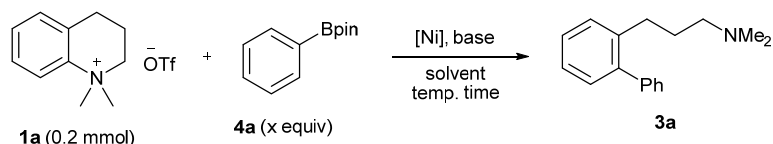

| Entry | [Ni] (mol%)                                             | x   | Solvent | Base (2 equiv.)                 | Temp. (°C) | Time (h) | Yield <sup>a</sup> (%) |
|-------|---------------------------------------------------------|-----|---------|---------------------------------|------------|----------|------------------------|
| 1     | NiCl <sub>2</sub> (10)                                  | 2.0 | THF     | NaOtBu                          | 80         | 16       | 29                     |
| 2     | NiF <sub>2</sub> (10)                                   | 2.0 | THF     | NaOtBu                          | 80         | 16       | nr                     |
| 3     | Ni(OTf) <sub>2</sub> (10)                               | 2.0 | THF     | NaOtBu                          | 80         | 16       | 41                     |
| 4     | NiCl <sub>2</sub> (DME) (10)                            | 2.0 | THF     | NaOtBu                          | 80         | 16       | 27                     |
| 5     | NiCl <sub>2</sub> (PCy <sub>3</sub> ) <sub>2</sub> (10) | 2.0 | THF     | NaOtBu                          | 80         | 16       | 70                     |
| 6     | NiCl <sub>2</sub> (PPh <sub>3</sub> ) <sub>2</sub> (10) | 2.0 | THF     | NaOtBu                          | 80         | 16       | 14                     |
| 7     | NiCl <sub>2</sub> (dppe) (10)                           | 2.0 | THF     | NaOtBu                          | 80         | 16       | 18                     |
| 8     | NiCl <sub>2</sub> (dppp) (10)                           | 2.0 | THF     | NaOtBu                          | 80         | 16       | 18                     |
| 9     | NiCl <sub>2</sub> (dppf) (10)                           | 2.0 | THF     | NaOtBu                          | 80         | 16       | 28                     |
| 10    | NiCl <sub>2</sub> (PCy <sub>3</sub> ) <sub>2</sub> (10) | 2.0 | dioxane | NaOtBu                          | 80         | 16       | 80 (78 <sup>b</sup> )  |
| 11    | NiCl <sub>2</sub> (PCy <sub>3</sub> ) <sub>2</sub> (10) | 2.0 | DME     | NaOtBu                          | 80         | 16       | 23                     |
| 12    | NiCl <sub>2</sub> (PCy <sub>3</sub> ) <sub>2</sub> (10) | 2.0 | toluene | NaOtBu                          | 80         | 16       | 42                     |
| 13    | NiCl <sub>2</sub> (PCy <sub>3</sub> ) <sub>2</sub> (10) | 2.0 | dioxane | NaOtBu                          | 90         | 16       | 75                     |
| 14    | NiCl <sub>2</sub> (PCy <sub>3</sub> ) <sub>2</sub> (10) | 2.0 | dioxane | NaOtBu                          | 70         | 16       | 70                     |
| 15    | NiCl <sub>2</sub> (PCy <sub>3</sub> ) <sub>2</sub> (10) | 2.5 | dioxane | NaOtBu                          | 80         | 16       | 77                     |
| 16    | NiCl <sub>2</sub> (PCy <sub>3</sub> ) <sub>2</sub> (10) | 1.5 | dioxane | NaOtBu                          | 80         | 16       | 31                     |
| 17    | NiCl <sub>2</sub> (PCy <sub>3</sub> ) <sub>2</sub> (15) | 2.0 | dioxane | NaOtBu                          | 80         | 16       | 46                     |
| 18    | NiCl <sub>2</sub> (PCy <sub>3</sub> ) <sub>2</sub> (5)  | 2.0 | dioxane | NaOtBu                          | 80         | 16       | 55                     |
| 19    | NiCl <sub>2</sub> (PCy <sub>3</sub> ) <sub>2</sub> (10) | 2.0 | dioxane | NaOtBu                          | 80         | 18       | 78                     |
| 20    | NiCl <sub>2</sub> (PCy <sub>3</sub> ) <sub>2</sub> (10) | 2.0 | dioxane | KOtBu                           | 80         | 16       | 42                     |
| 21    | NiCl <sub>2</sub> (PCy <sub>3</sub> ) <sub>2</sub> (10) | 2.0 | dioxane | LiOtBu                          | 80         | 16       | 12                     |
| 22    | NiCl <sub>2</sub> (PCy <sub>3</sub> ) <sub>2</sub> (10) | 2.0 | dioxane | NaOH                            | 80         | 16       | nr                     |
| 23    | NiCl <sub>2</sub> (PCy <sub>3</sub> ) <sub>2</sub> (10) | 2.0 | dioxane | KOH                             | 80         | 16       | nr                     |
| 24    | NiCl <sub>2</sub> (PCy <sub>3</sub> ) <sub>2</sub> (10) | 2.0 | dioxane | Cs <sub>2</sub> CO <sub>3</sub> | 80         | 16       | nr                     |
| 25    | NiCl <sub>2</sub> (PCy <sub>3</sub> ) <sub>2</sub> (10) | 2.0 | dioxane | KF                              | 80         | 16       | nr                     |

<sup>a</sup> NMR yields using 1,1,2,2-tetrachloroethane as an internal standard. <sup>b</sup> Isolated yields.

(3) Condition optimization of the reaction of cyclic quaternary ammonium salts with dimethyl(phenyl)(4,4,5,5-tetramethyl-1,3,2-dioxaborolan-2-yl)silane

Table S4. Optimization of conditions for the reaction of quaternary ammonium salt (**1a**) with dimethyl(phenyl)(4,4,5,5-tetramethyl-1,3,2-dioxaborolan-2-yl)silane (**5**)

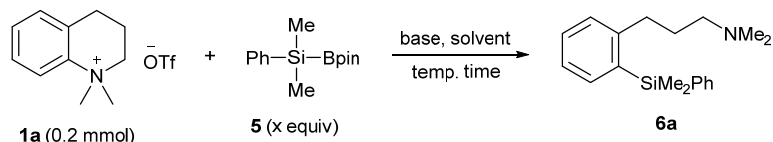

| Entry | x   | T/°C | time/h | Solvent/2ml       | Base (2.0 equiv) | Yield <sup>a</sup> (%) |
|-------|-----|------|--------|-------------------|------------------|------------------------|
| 1     | 2.0 | 60   | 12     | THF               | LiOtBu           | 88                     |
| 2     | 2.0 | 60   | 12     | THF               | NaOtBu           | 78                     |
| 3     | 2.0 | 60   | 12     | THF               | KOtBu            | 64                     |
| 4     | 2.0 | 60   | 12     | THF               | NaHMDS           | 74                     |
| 4     | 2.0 | 60   | 12     | THF               | CsF              | 65                     |
| 5     | 2.0 | 60   | 12     | THF               | KOH              | nr                     |
| 6     | 2.0 | 60   | 12     | THF               | NaOH             | nr                     |
| 7     | 2.0 | 40   | 12     | THF               | LiOtBu           | 95(95 <sup>b</sup> )   |
| 8     | 2.0 | 25   | 12     | THF               | LiOtBu           | 88                     |
| 9     | 2.0 | 40   | 8      | THF               | LiOtBu           | 74                     |
| 10    | 2.0 | 40   | 12     | Et <sub>2</sub> O | LiOtBu           | 70                     |
| 11    | 2.0 | 40   | 12     | DME               | LiOtBu           | nr                     |
| 12    | 2.0 | 40   | 12     | 1,4-dioxane       | LiOtBu           | nr                     |
| 13    | 2.5 | 40   | 10     | THF               | LiOtBu           | 95                     |

<sup>a</sup> NMR yields using 1,1,2,2-tetrachloroethane as an internal standard. <sup>b</sup> Isolated yields.

## 2. Detection of PhSiMe<sub>3</sub>

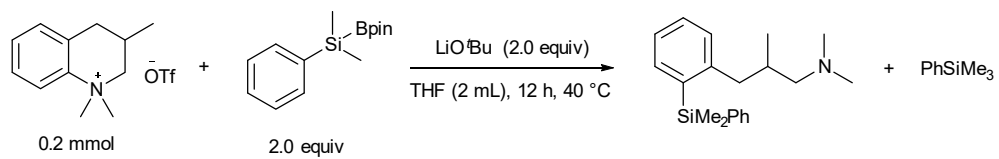

calcd. for C<sub>9</sub>H<sub>15</sub>Si<sup>+</sup> 151.0938 [M+H]<sup>+</sup>  
HRMS (ESI) found 151.0934

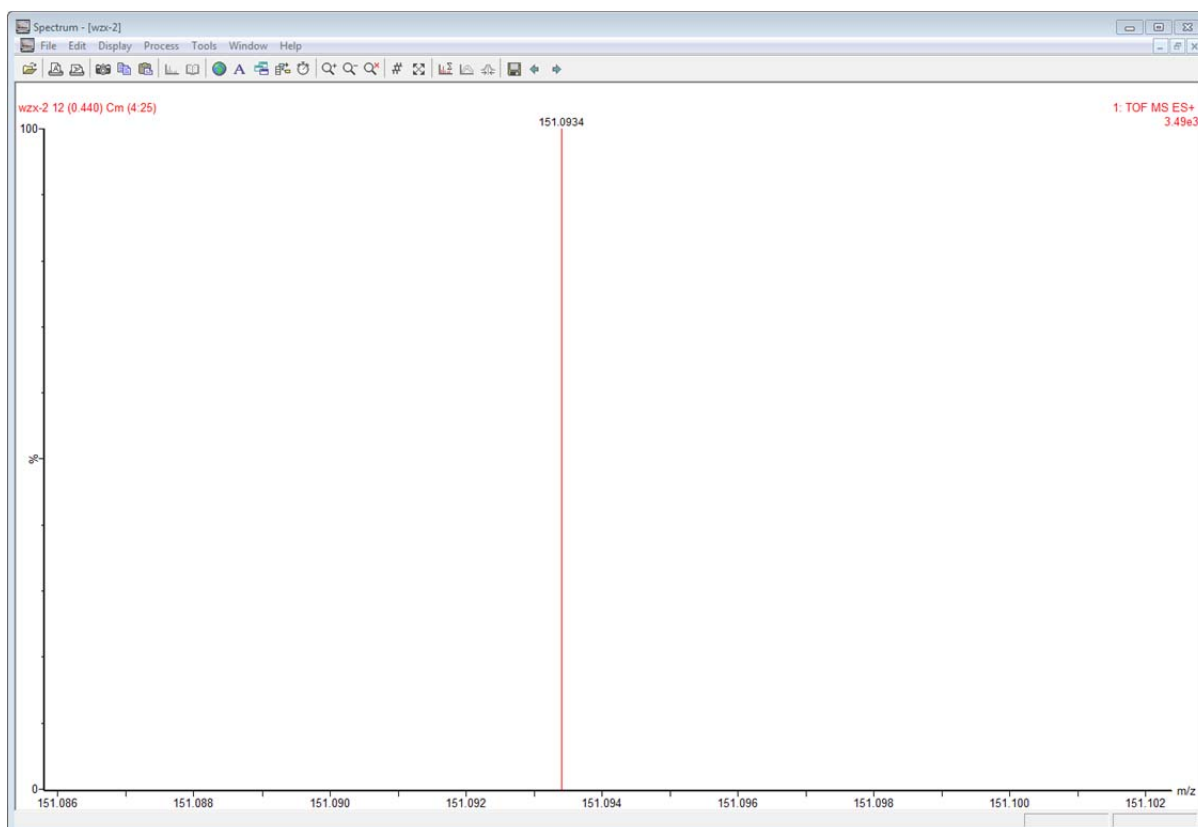

## 3. Spectral copies of the products

(1) 1,1-dimethyl-1,2,3,4-tetrahydroquinolin-1-ium triflate (**1a**)

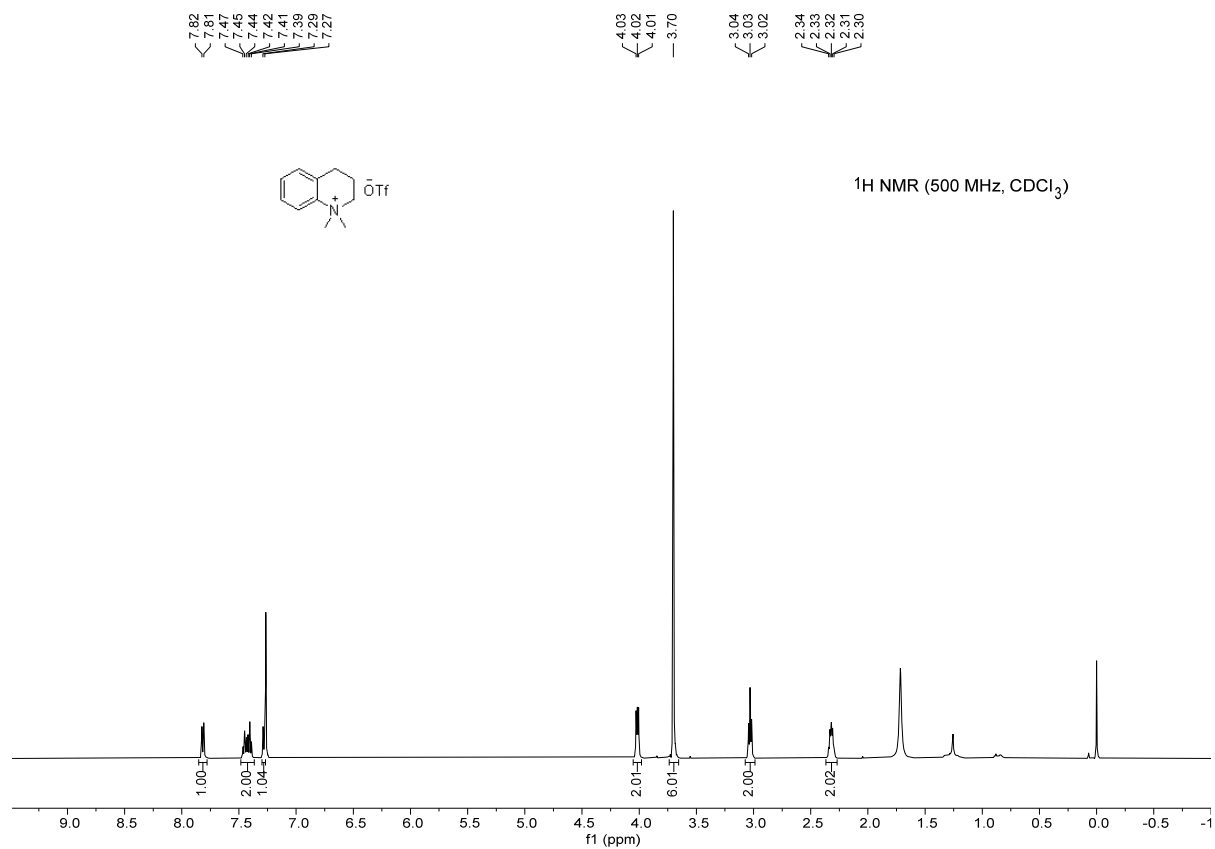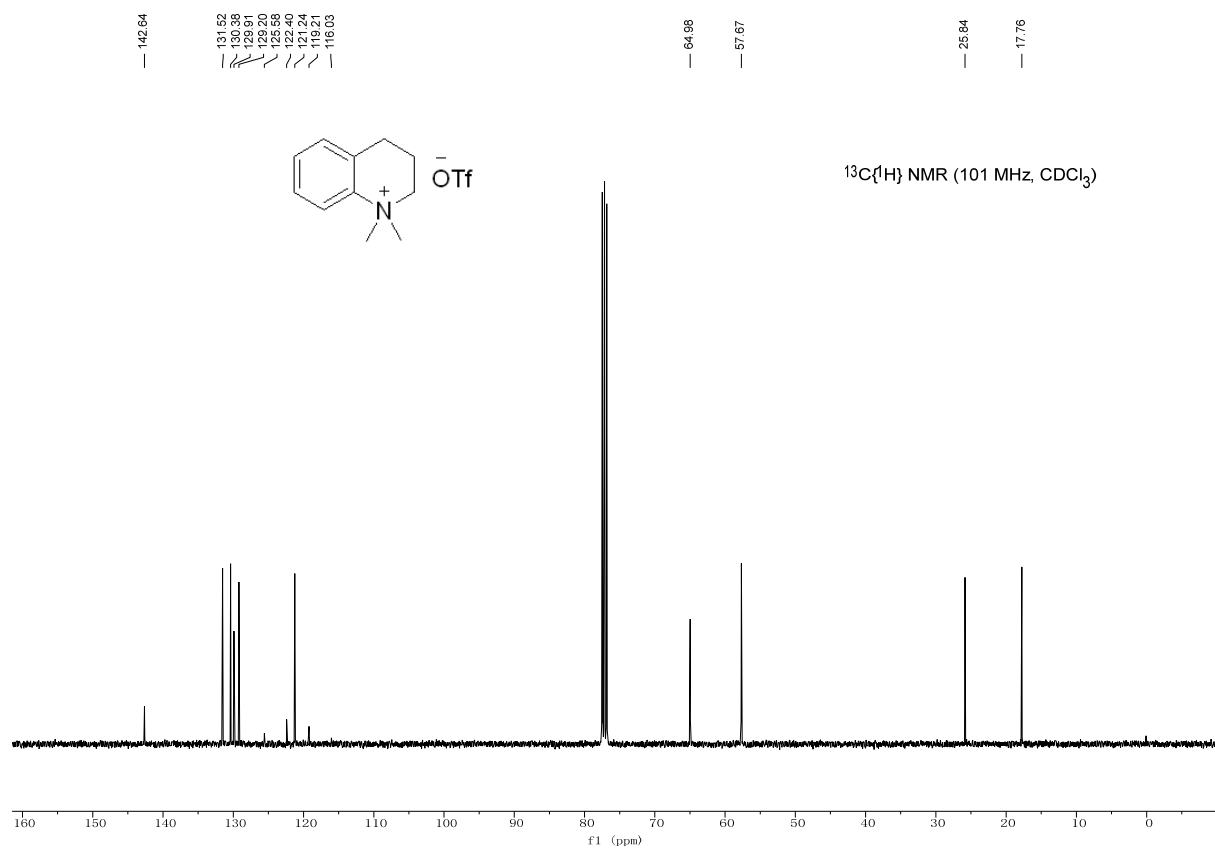



(2) 1,1,6-trimethyl-1,2,3,4-tetrahydroquinolin-1-ium triflate (**1b**)

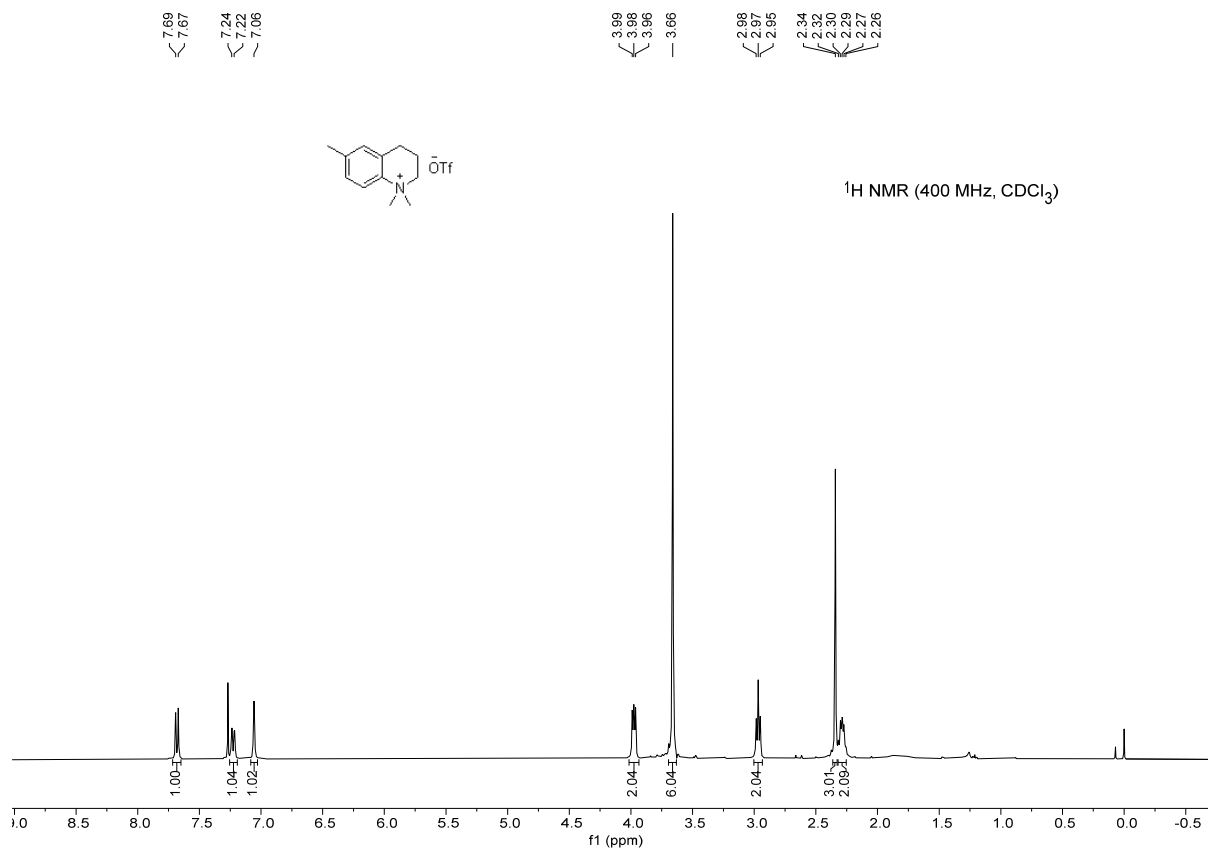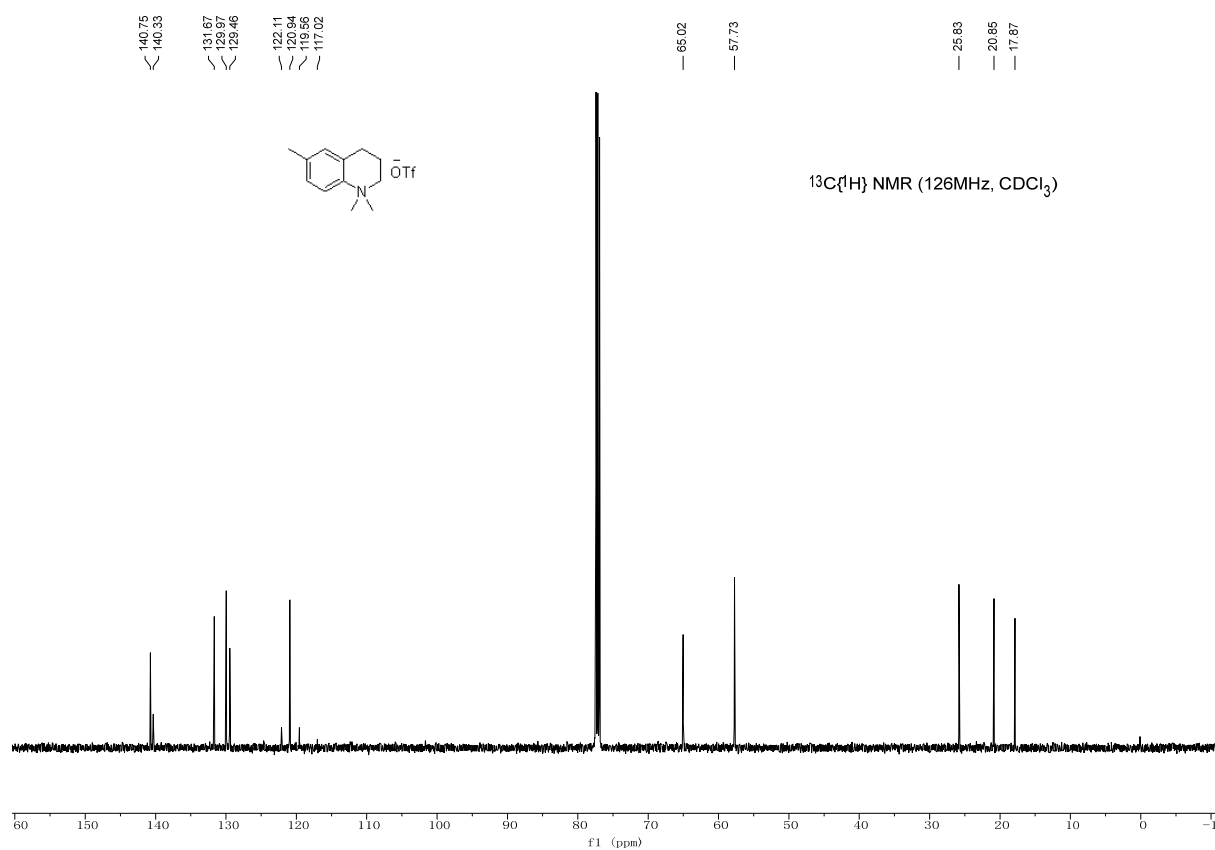

(3) 6-methoxy-1,1-dimethyl-1,2,3,4-tetrahydroquinolin-1-ium triflate (**1c**)

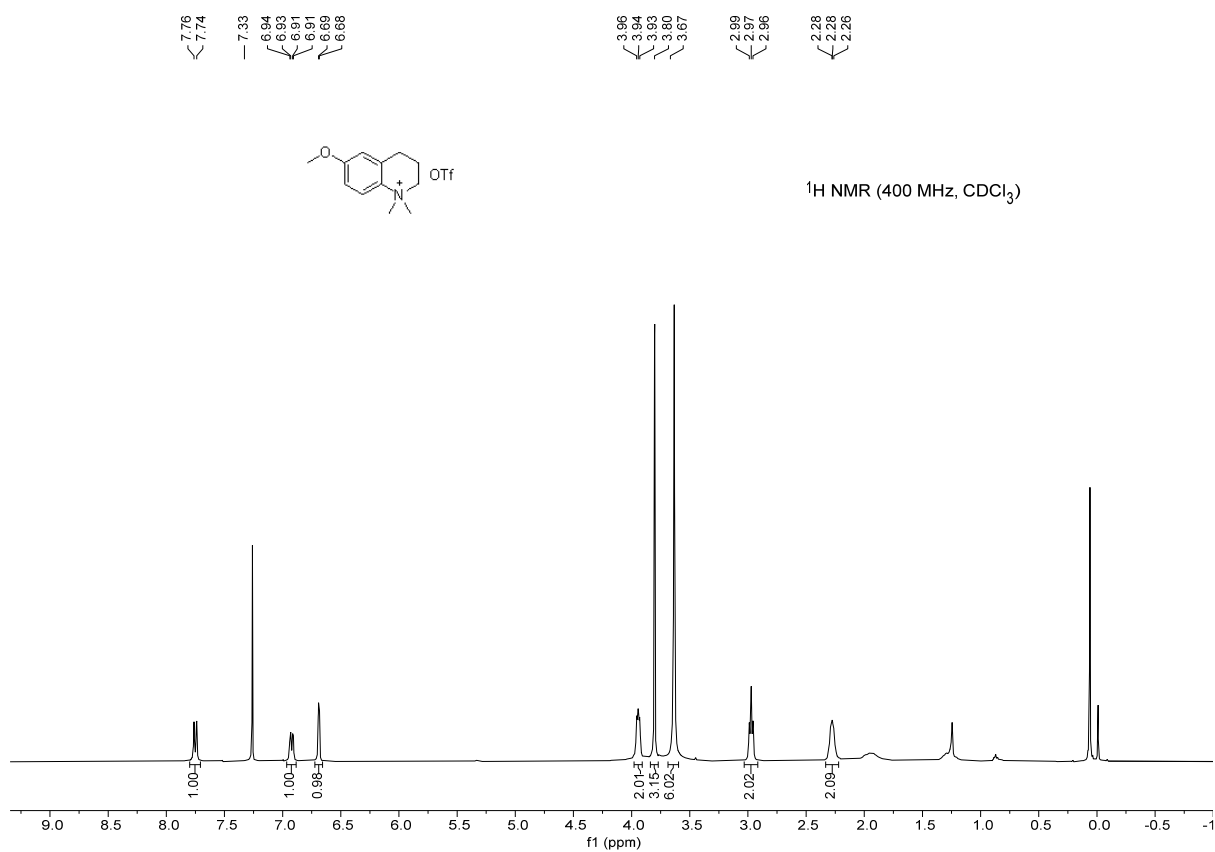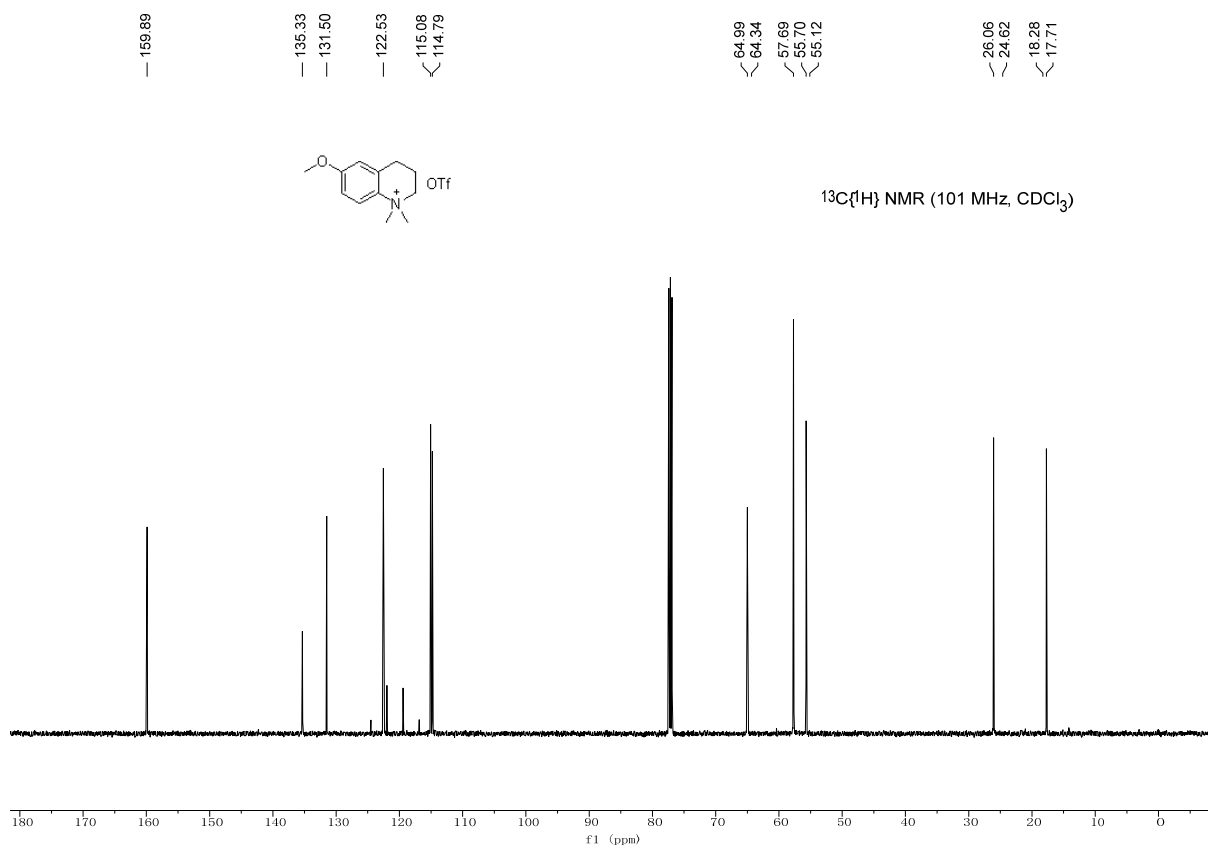

(4) 6-fluoro-1,1-dimethyl-1,2,3,4-tetrahydroquinolin-1-ium triflate (**1d**)

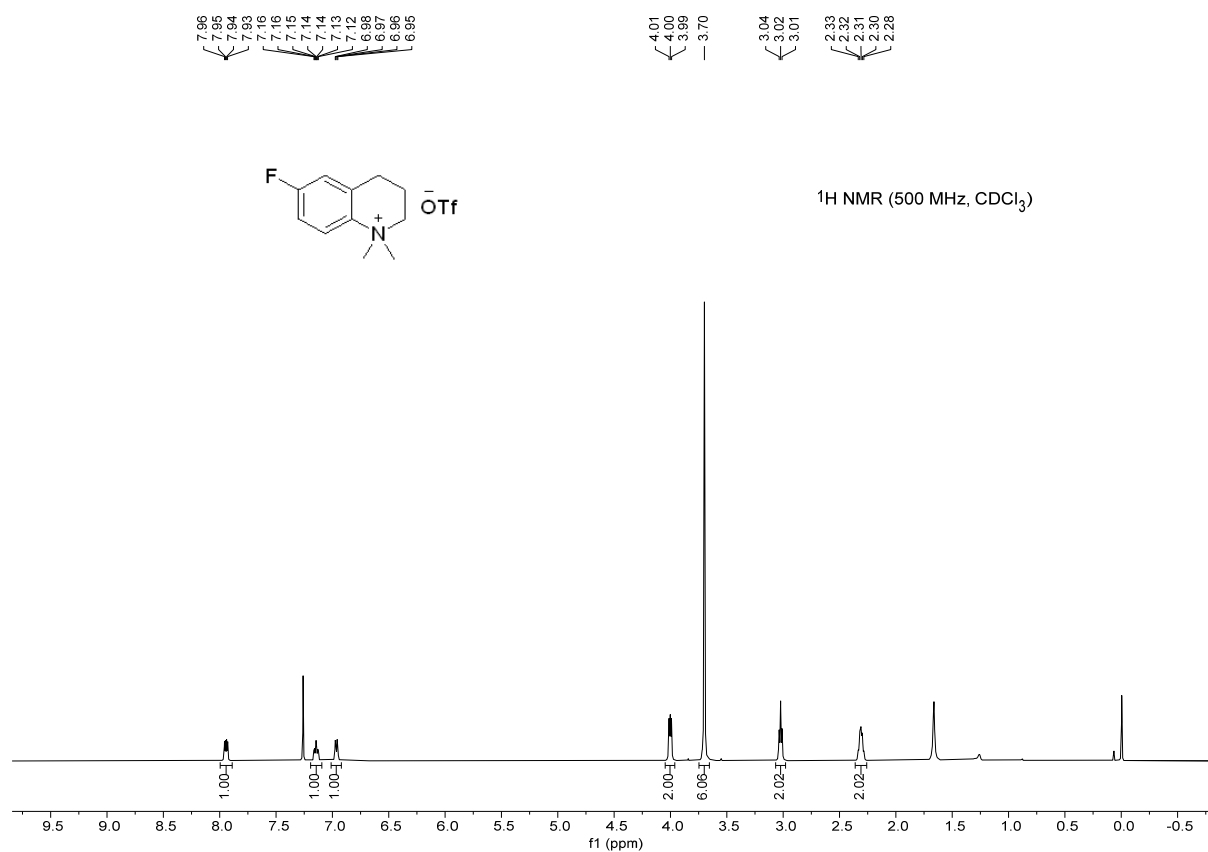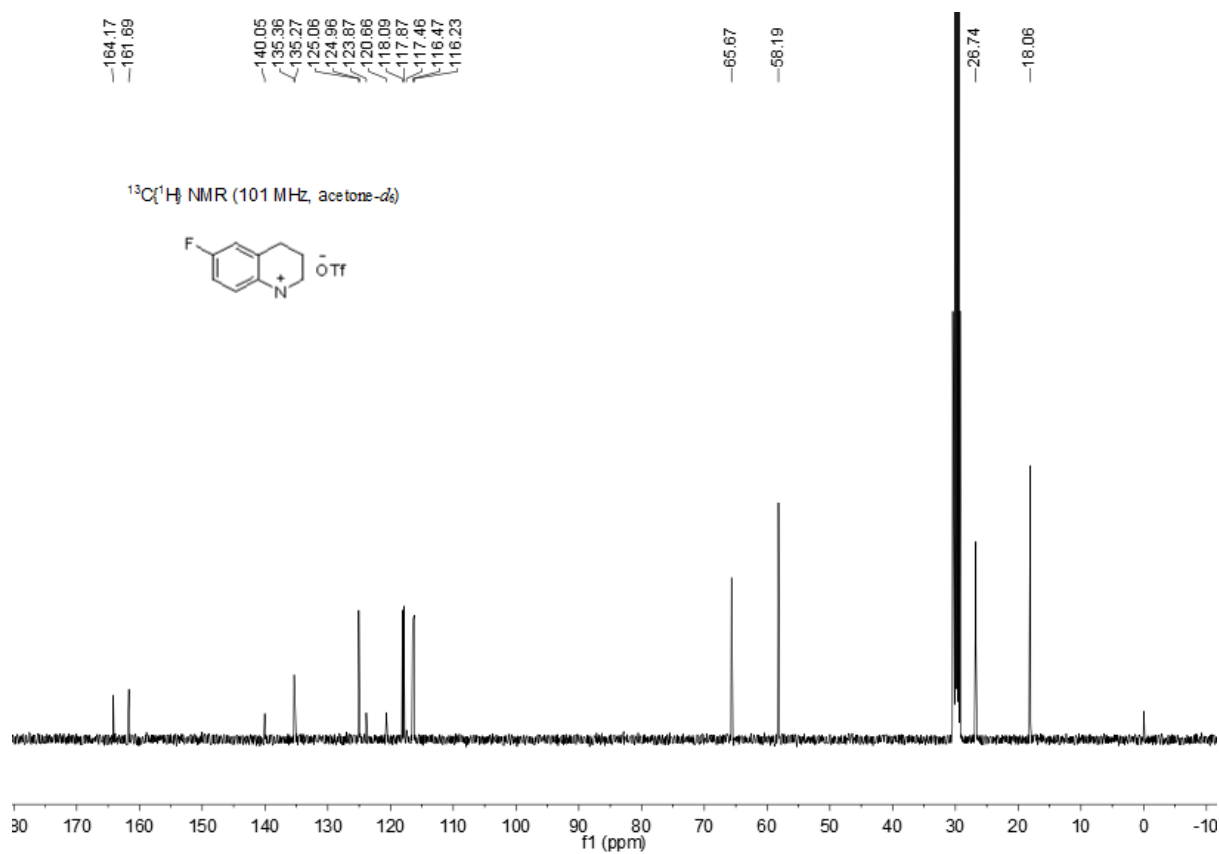

(5) 6-chloro-1,1-dimethyl-1,2,3,4-tetrahydroquinolin-1-ium triflate (**1e**)

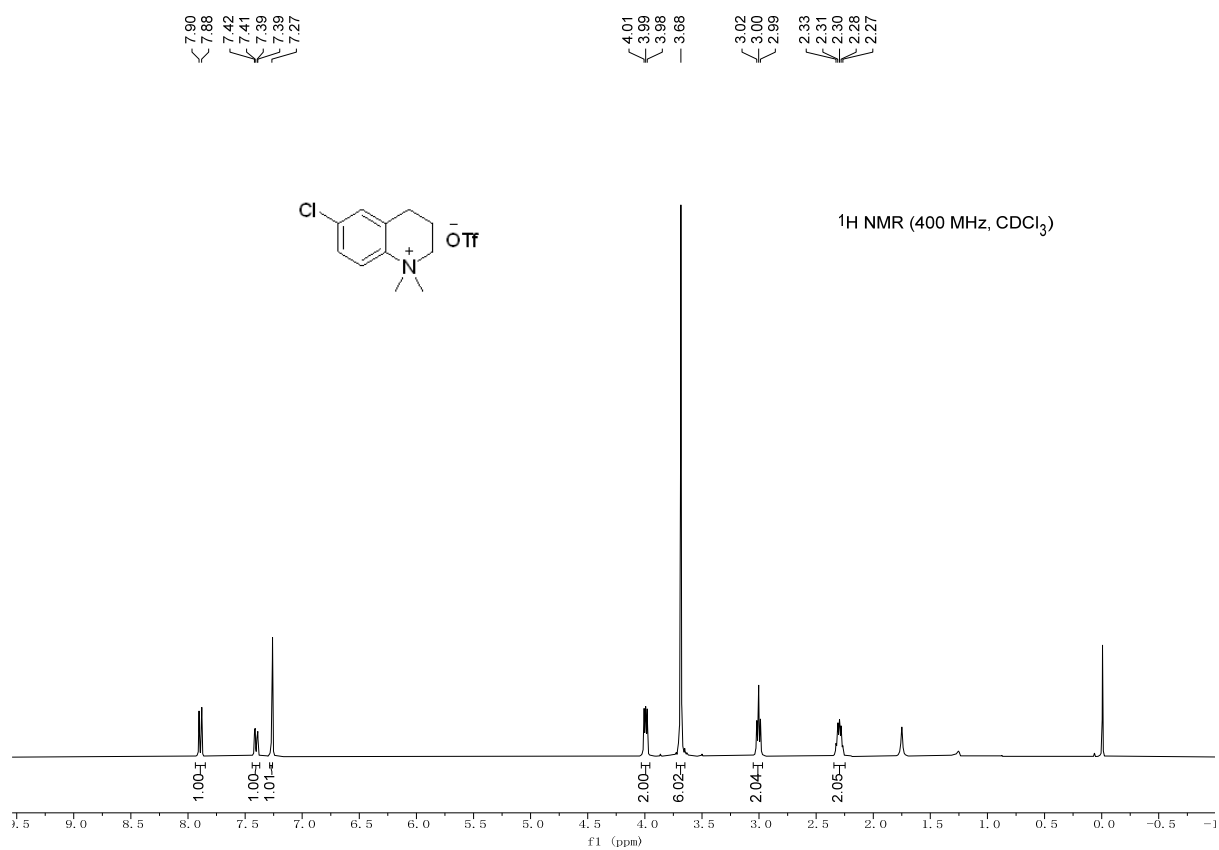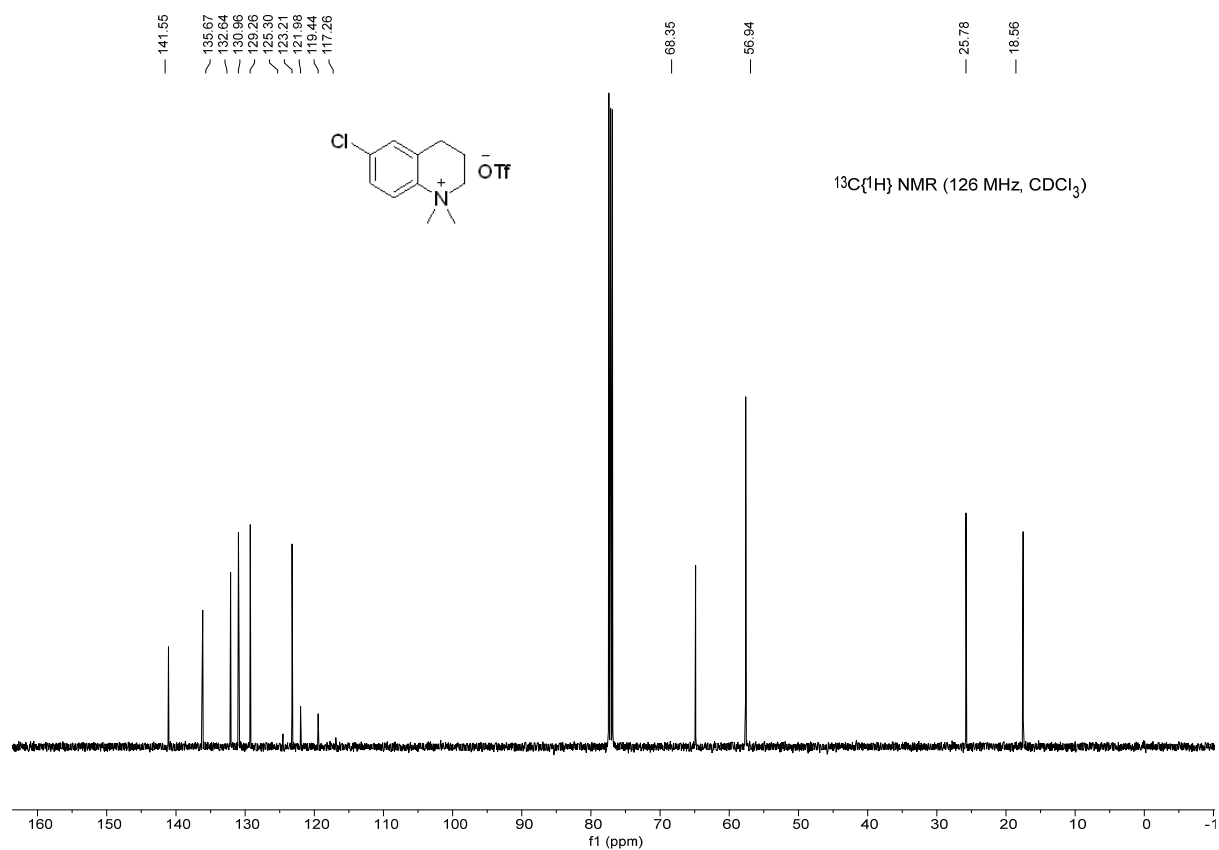

(6) 6-(methoxycarbonyl)-1,1-dimethyl-1,2,3,4-tetrahydroquinolin-1-ium triflate (**1f**)

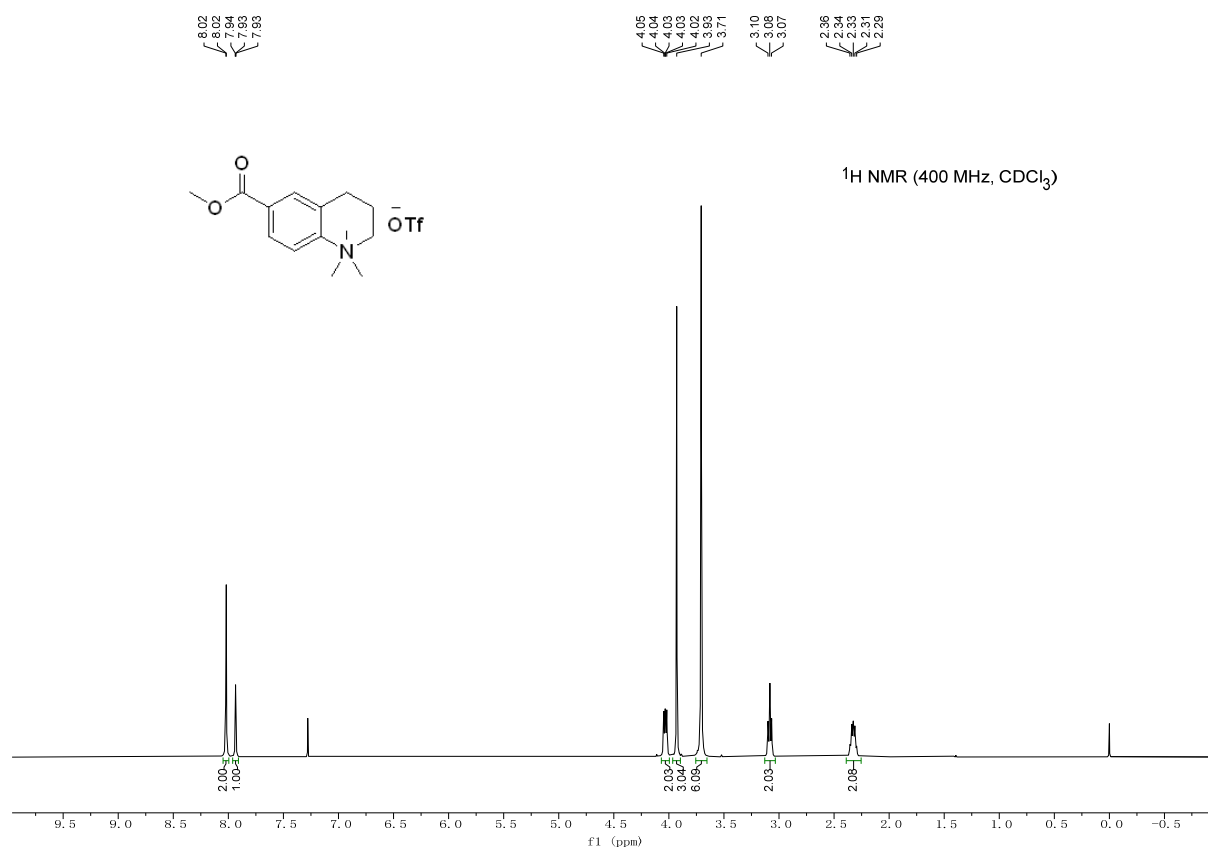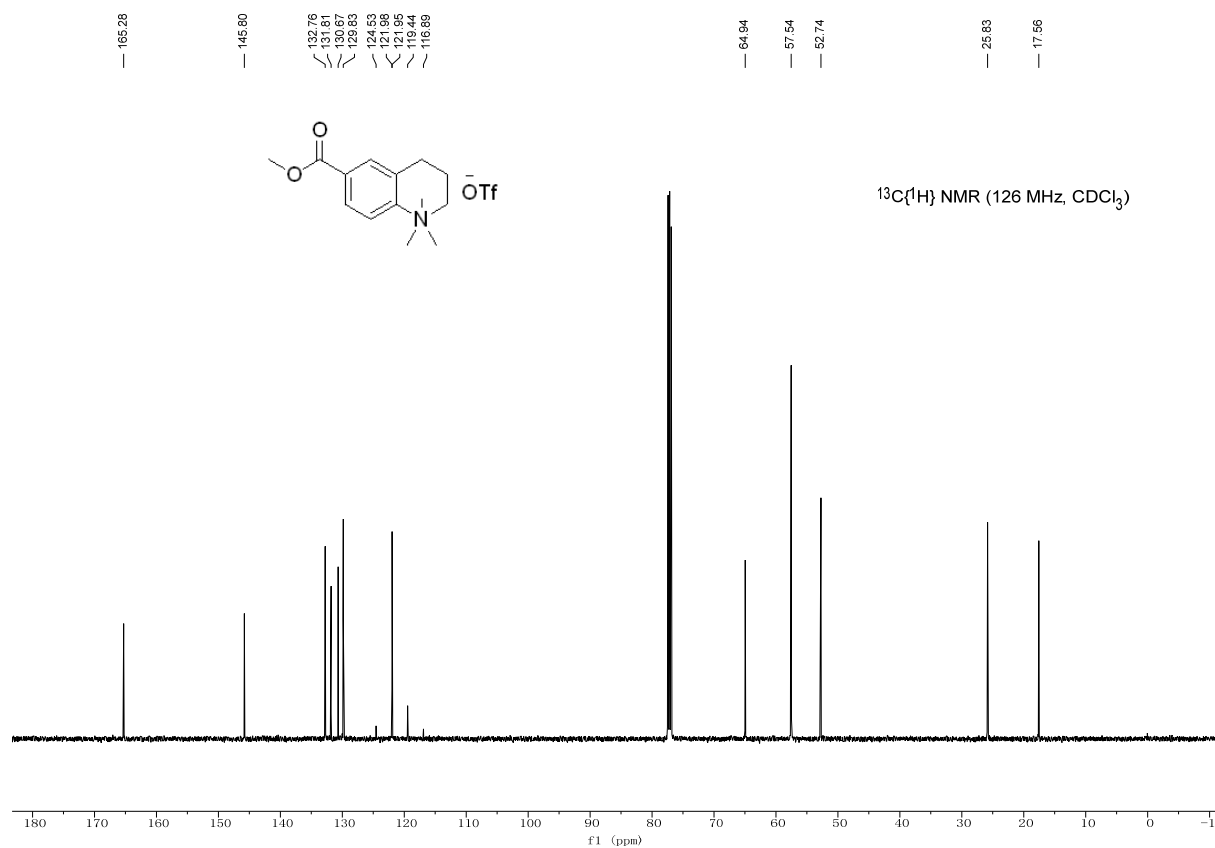

(7) 1,1,7-trimethyl-1,2,3,4-tetrahydroquinolin-1-ium triflate (**1g**)

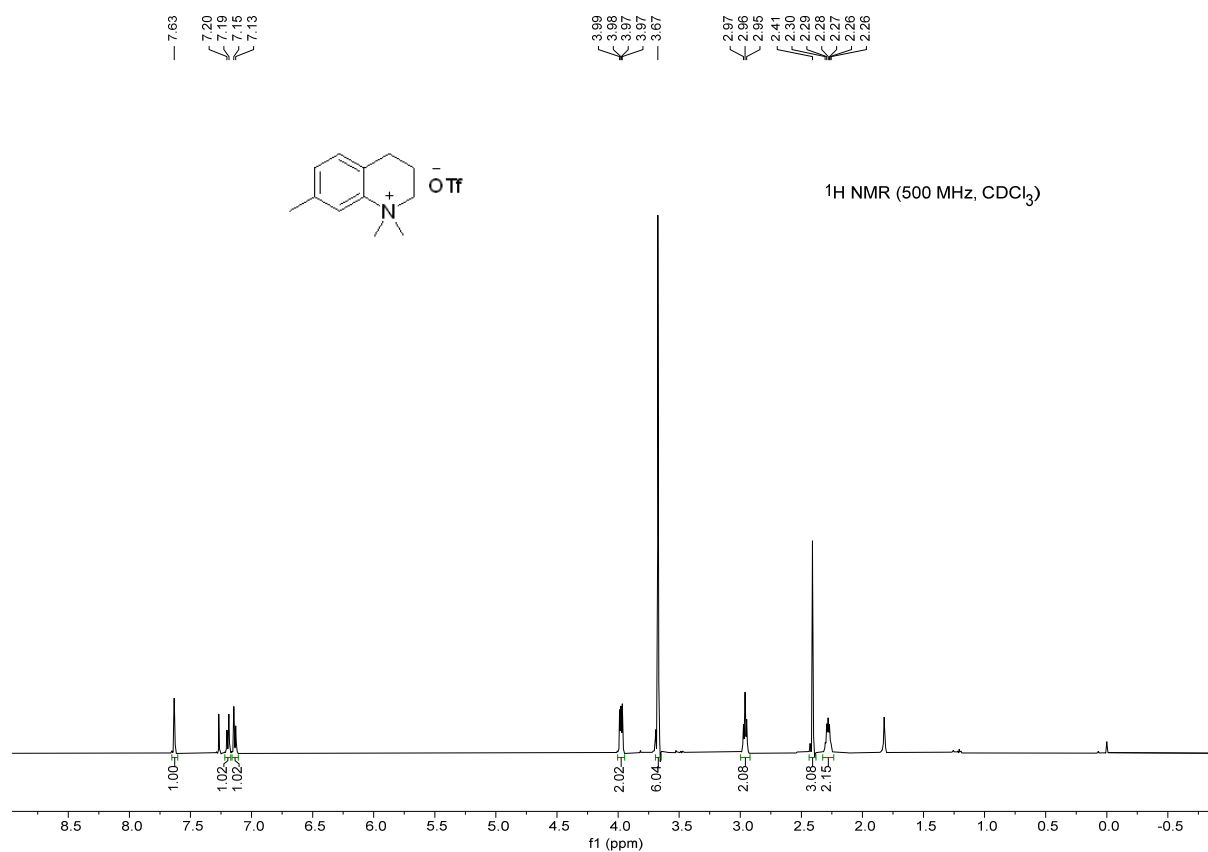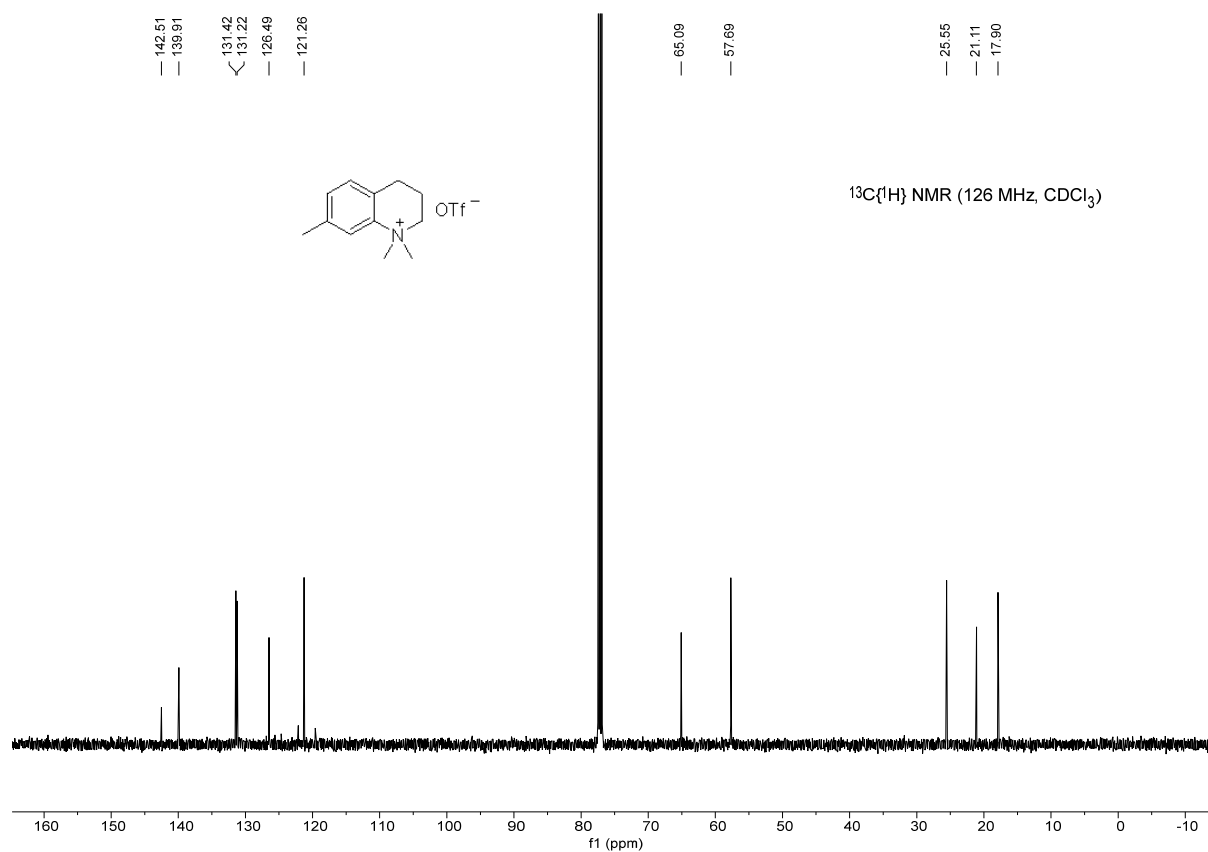

(8) 7-chloro-1,1-dimethyl-1,2,3,4-tetrahydroquinolin-1-ium triflate (**1h**)

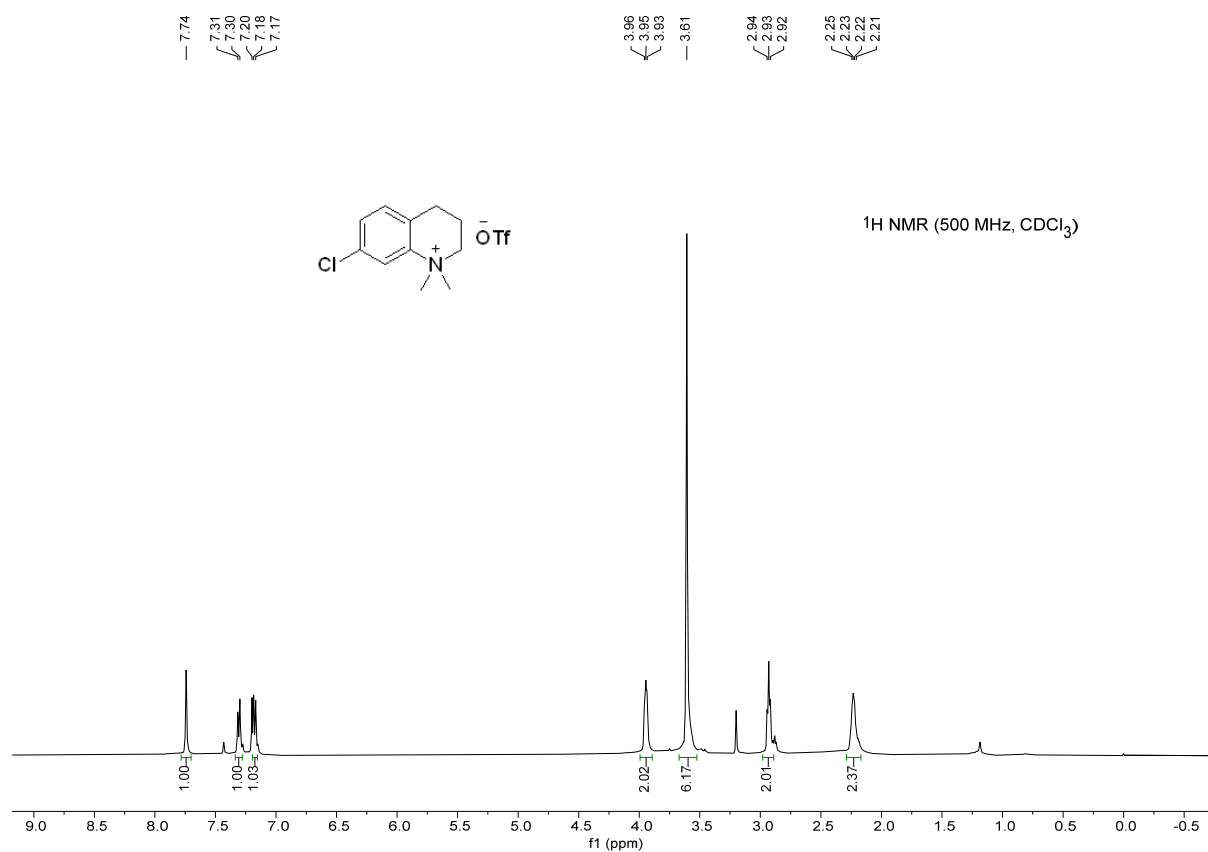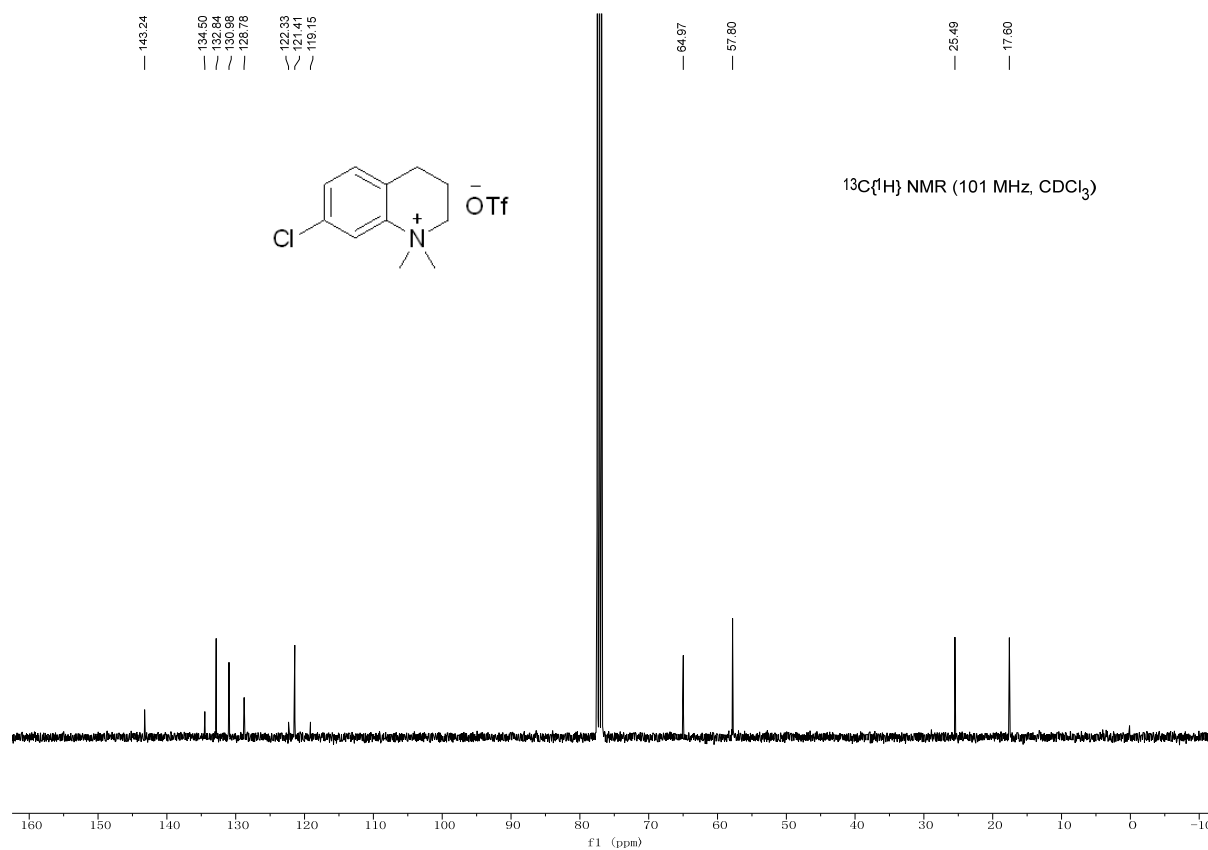

(9) 1,1,2-trimethyl-1,2,3,4-tetrahydroquinolin-1-ium triflate (**1i**)

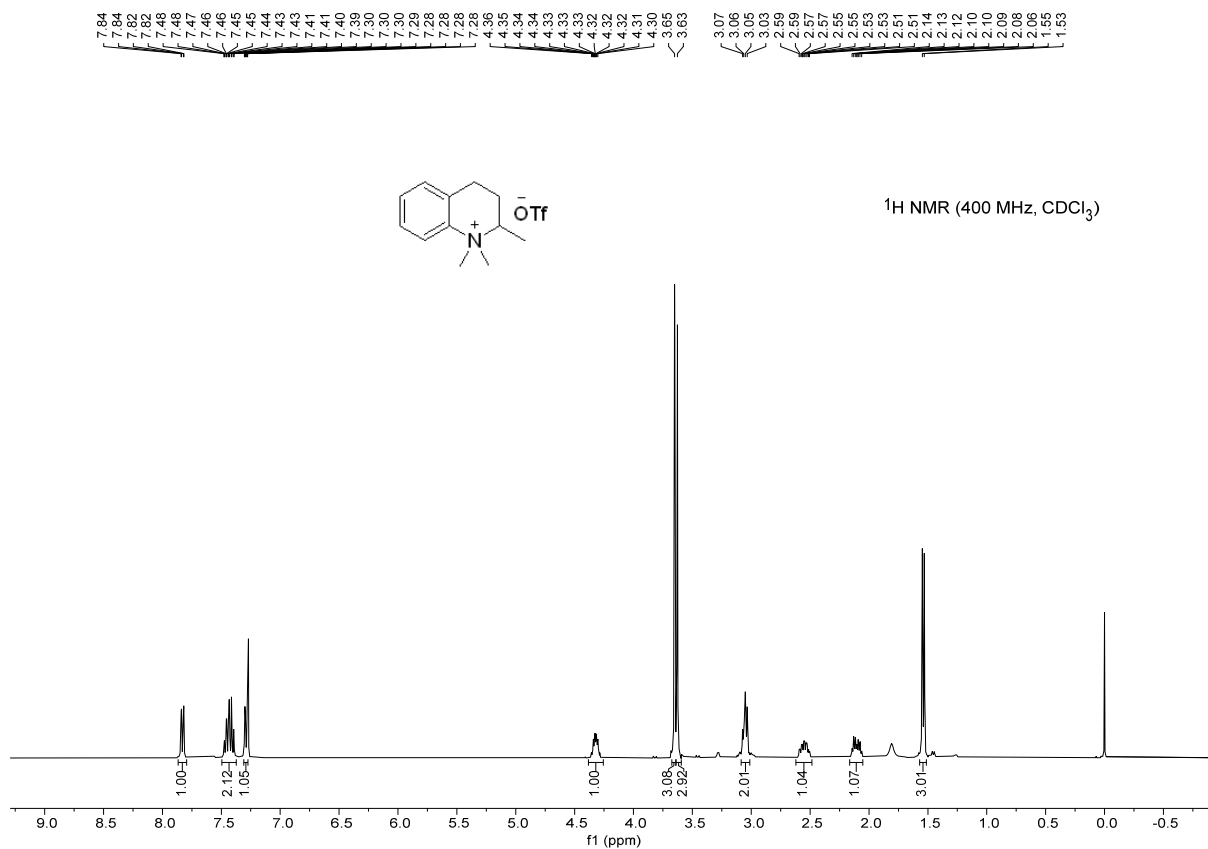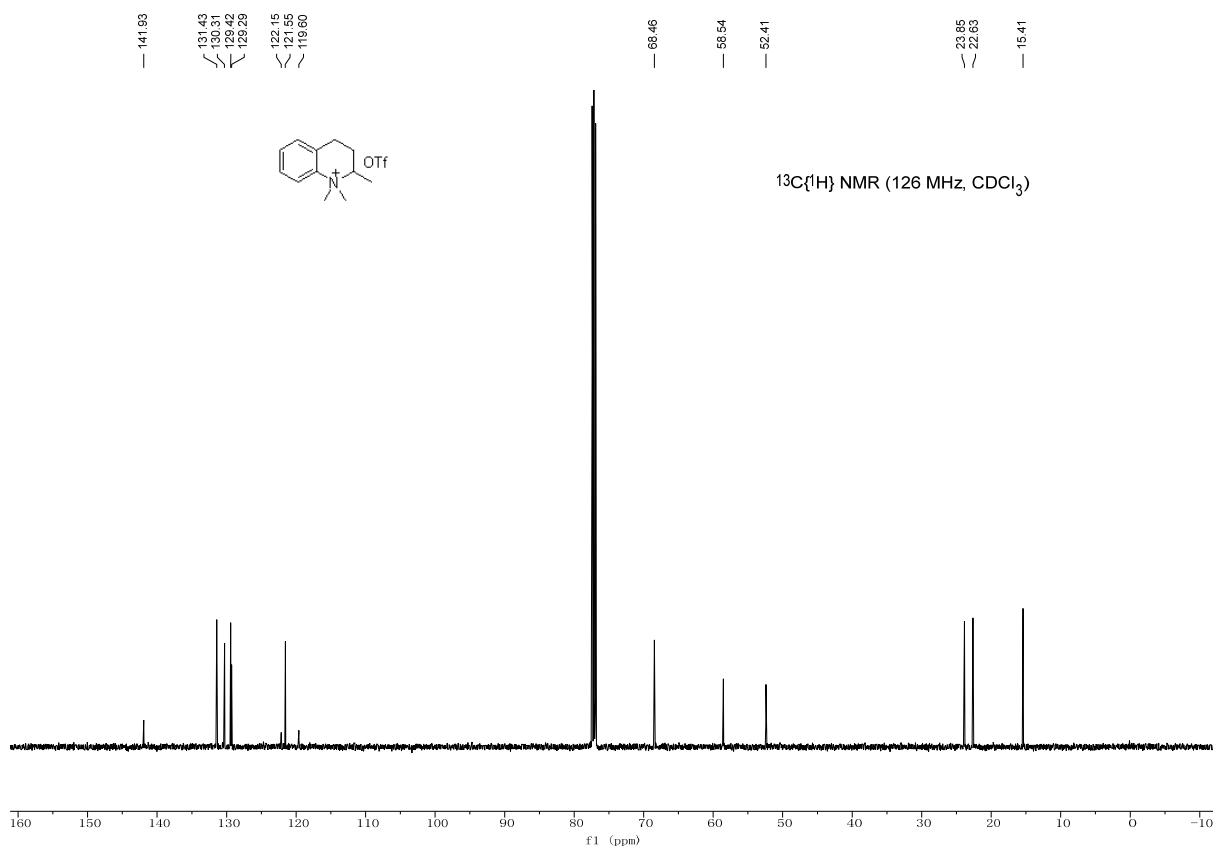



(10) 1,1,3-trimethyl-1,2,3,4-tetrahydroquinolin-1-ium triflate (**1j**)

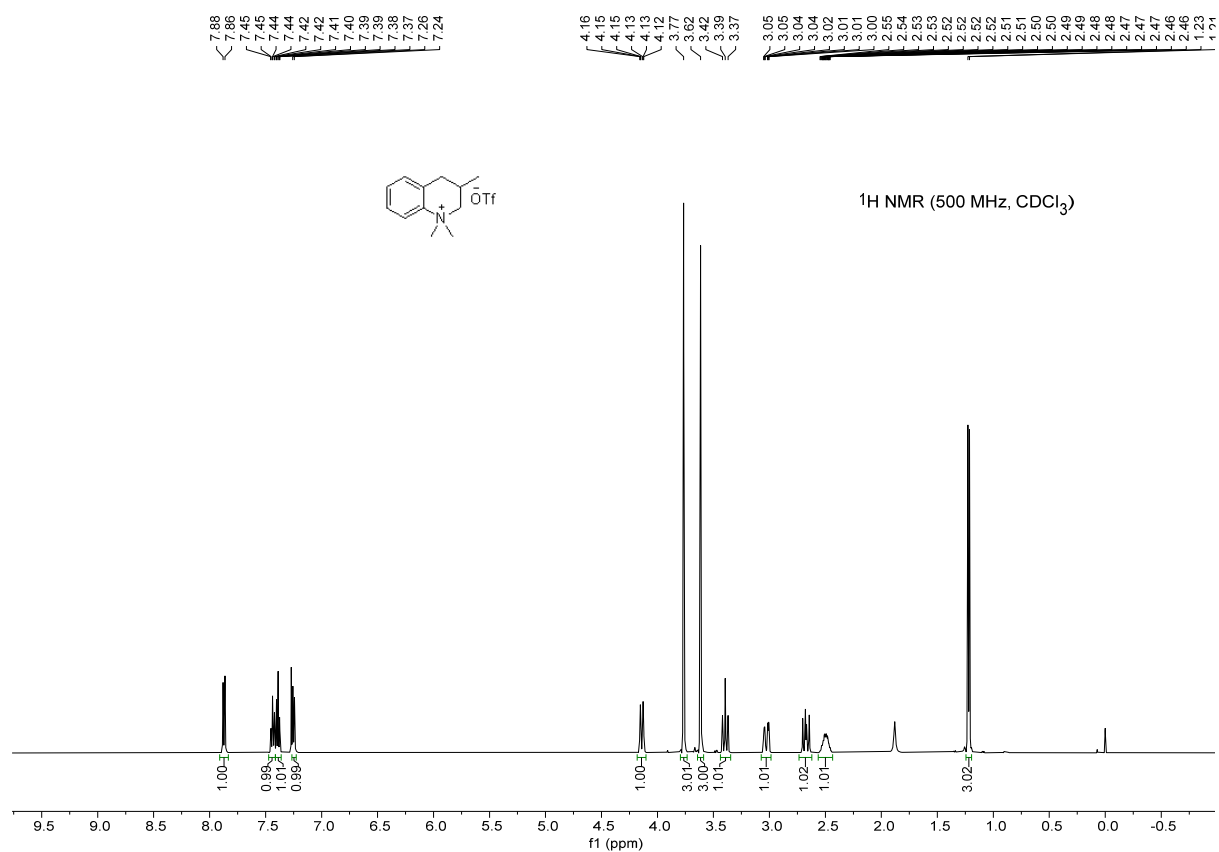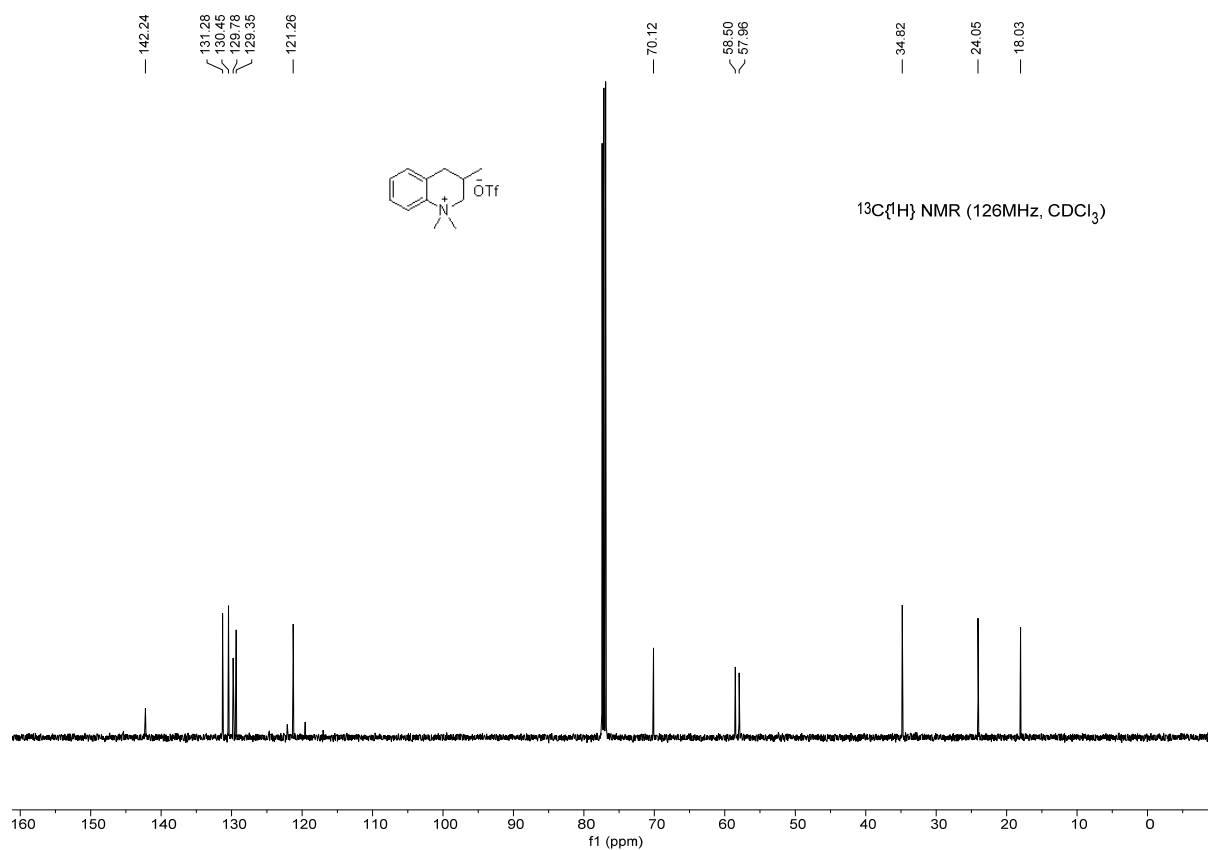

(11) 1,1,4-trimethyl-1,2,3,4-tetrahydroquinolin-1-ium triflate (**1k**)

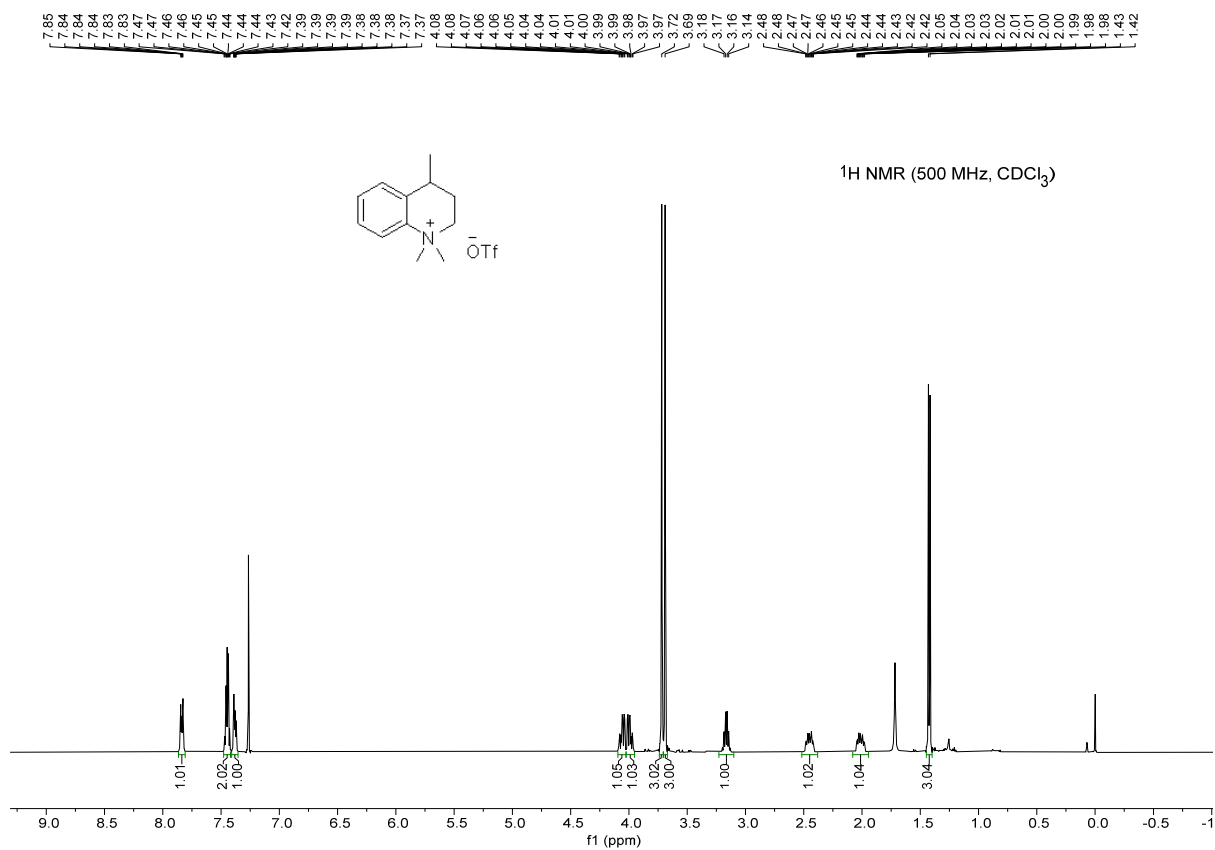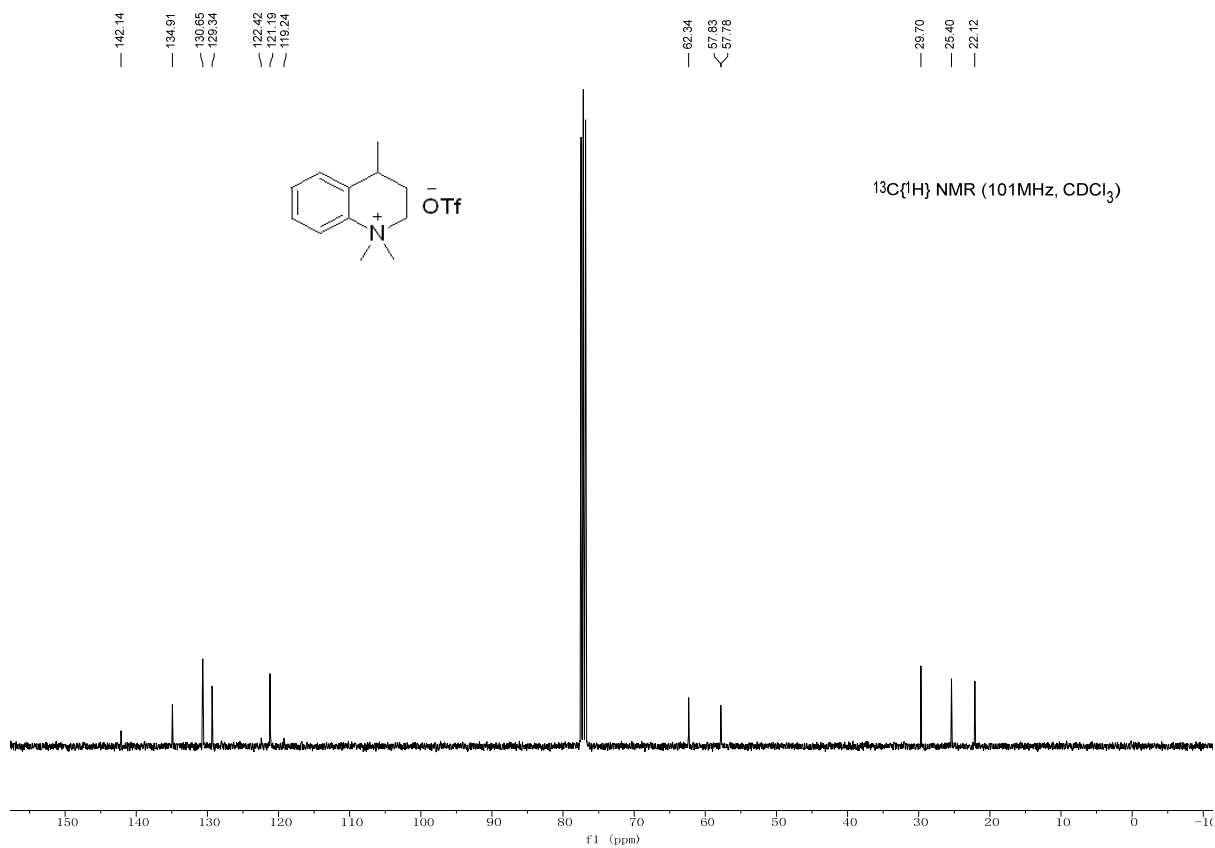

(12) 1,1,5-trimethyl-1,2,3,4-tetrahydroquinolin-1-ium triflate (**II**)

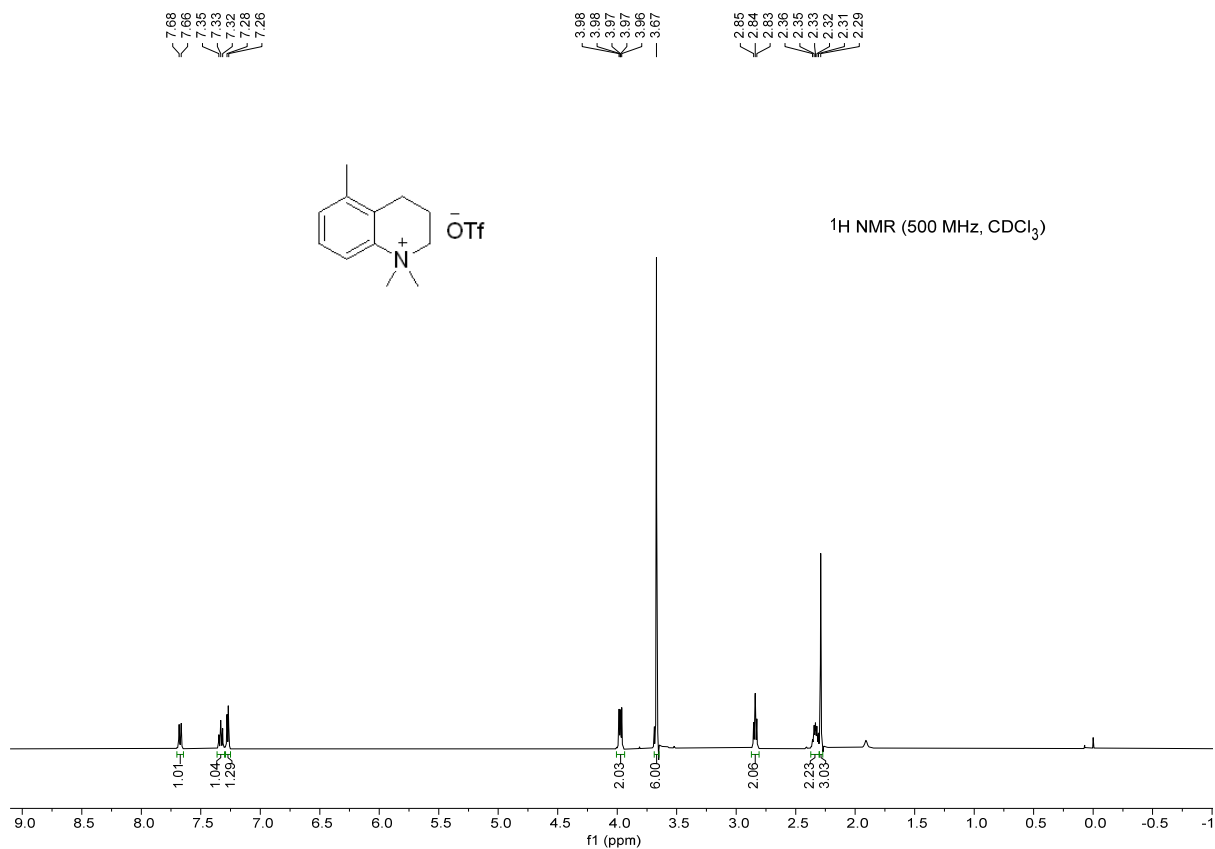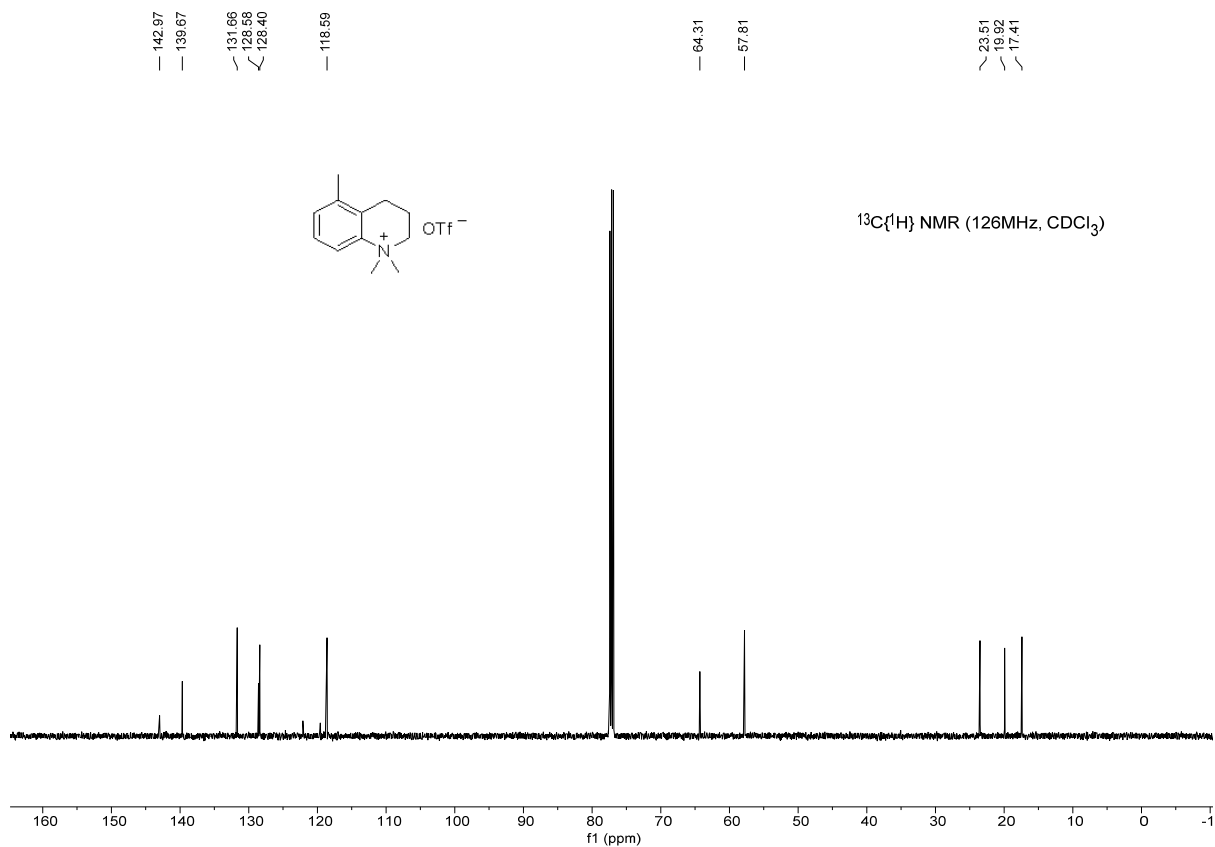

(13) 1,1-dimethylindolin-1-ium triflate (**1m**)

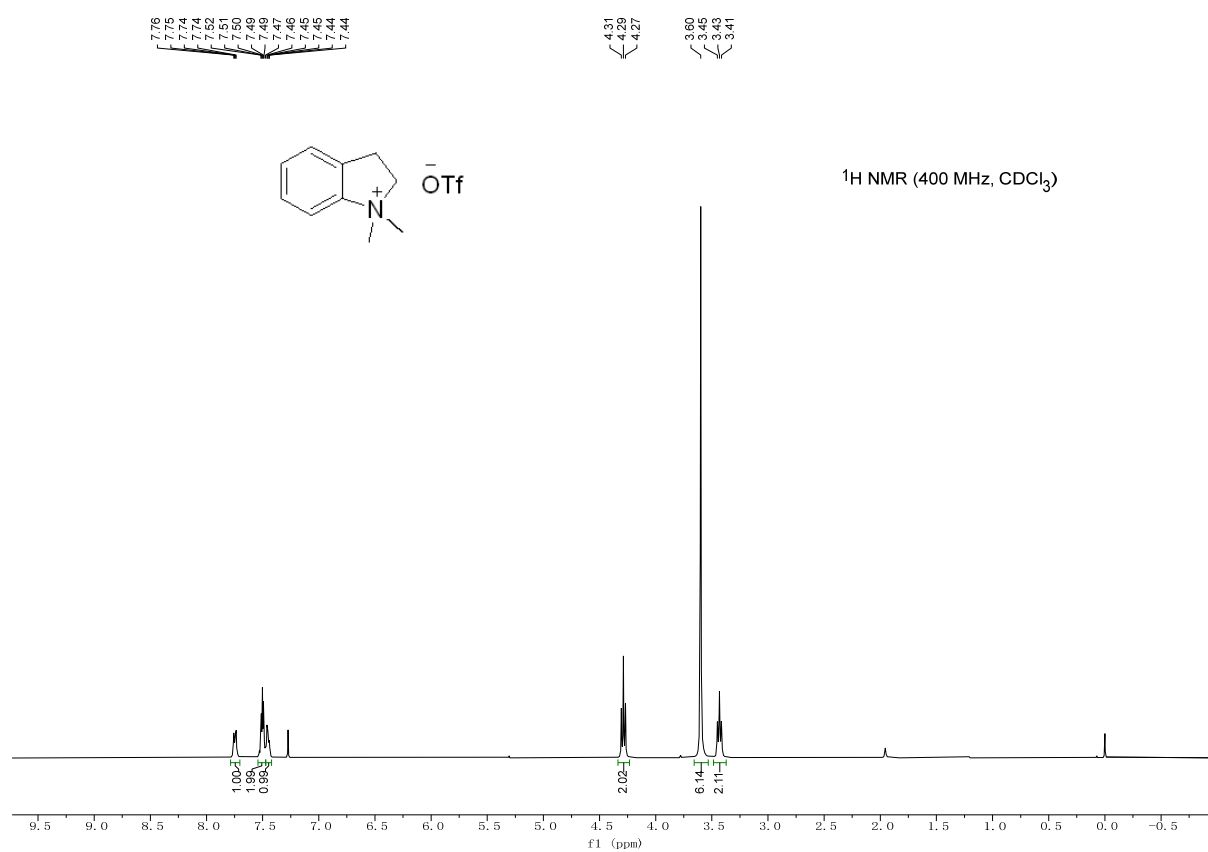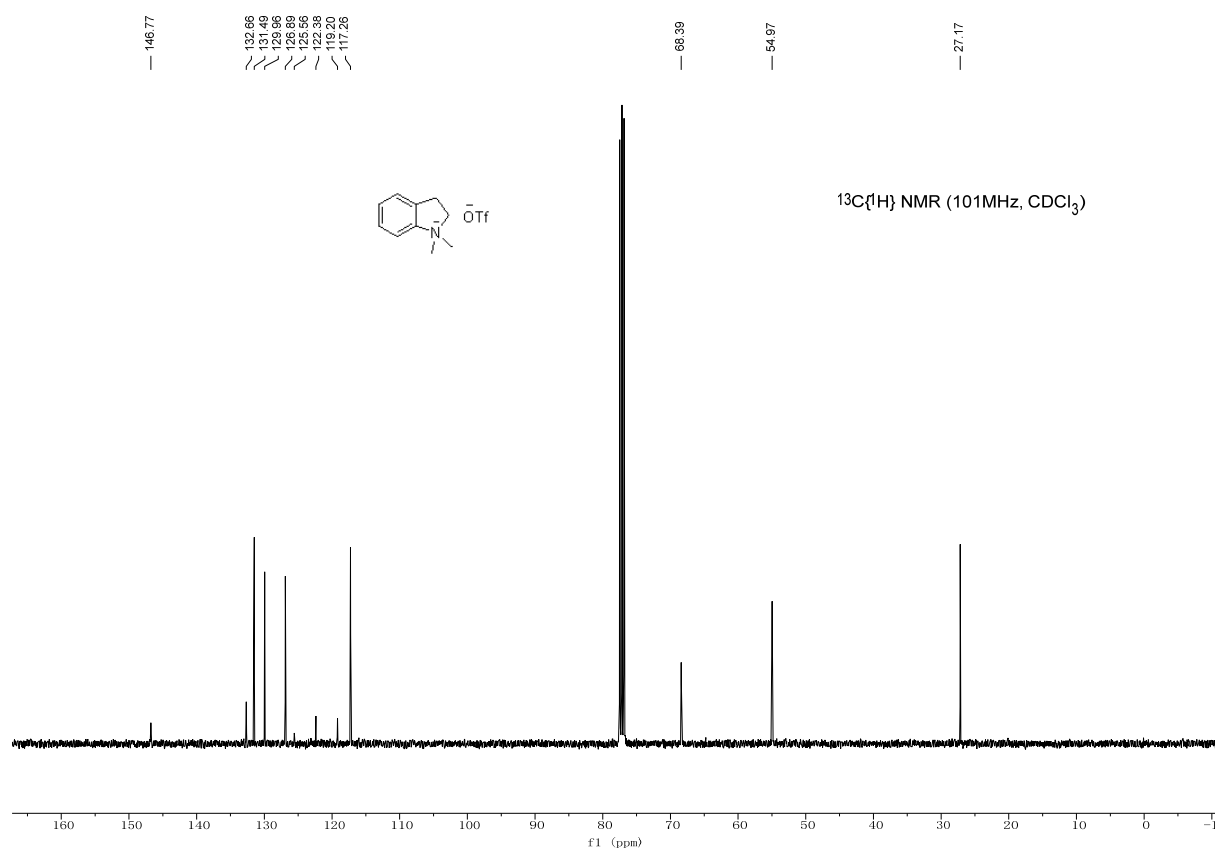

(14) 1,1-dimethyl-2,3,4,5-tetrahydro-1*H*-benzo[*b*]azepin-1-ium triflate (**1n**)

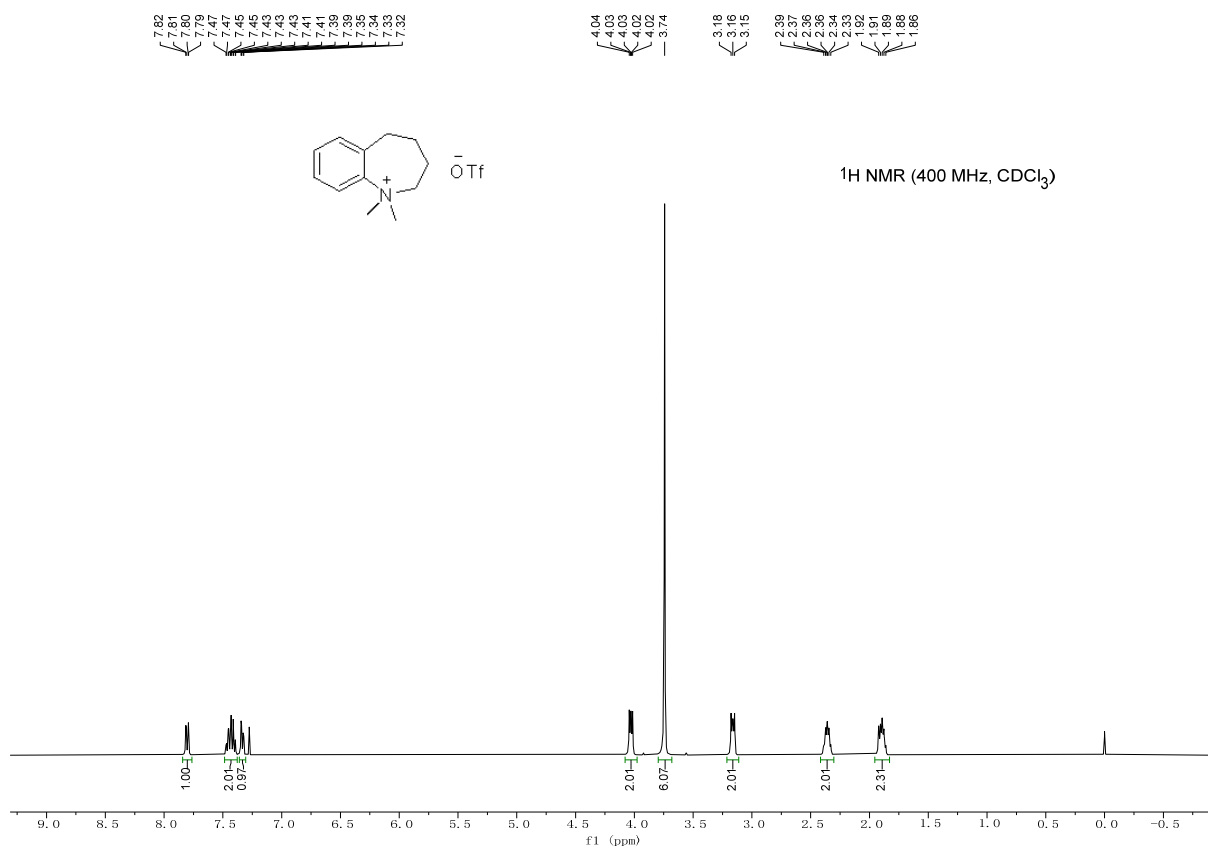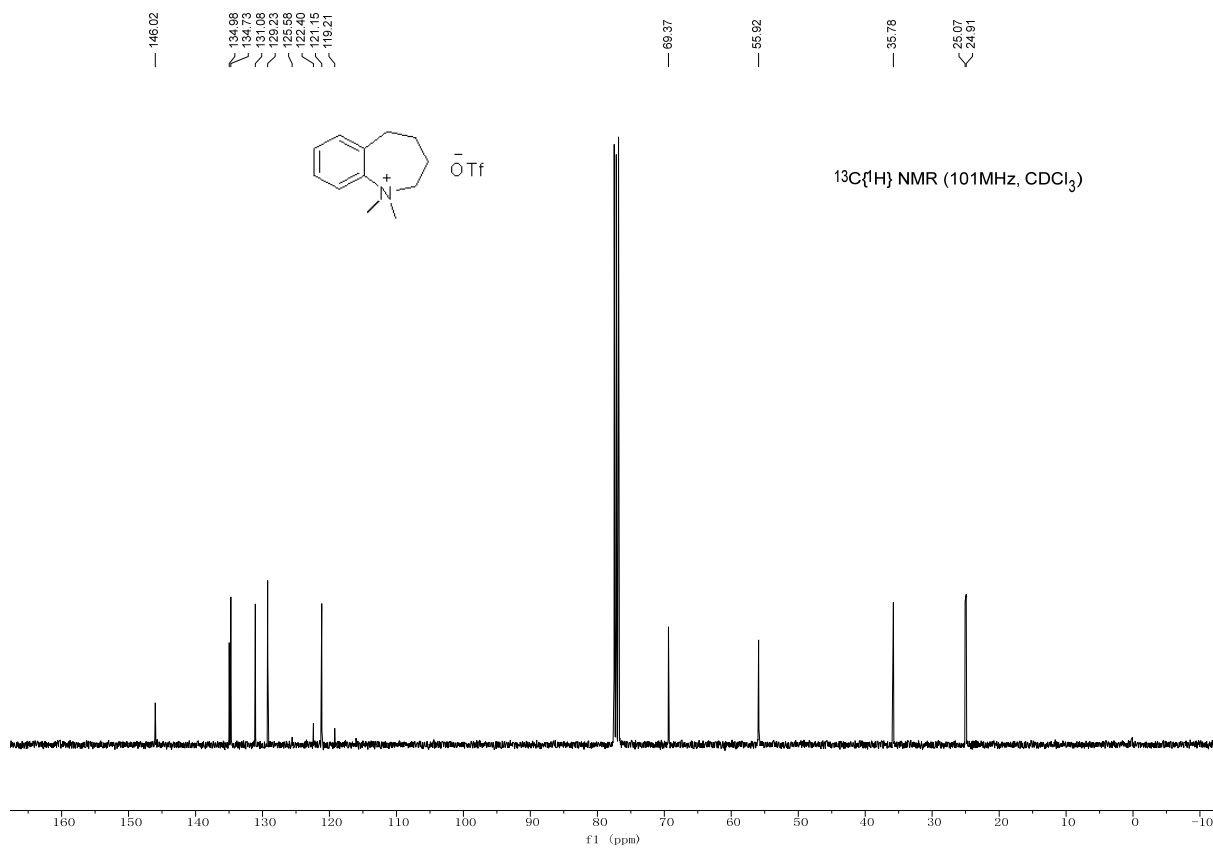

## 2. NMR spectral copies of the coupling products

### (1) 3-([1,1'-biphenyl]-2-yl)-N,N-dimethylpropan-1-amine (**3a**)

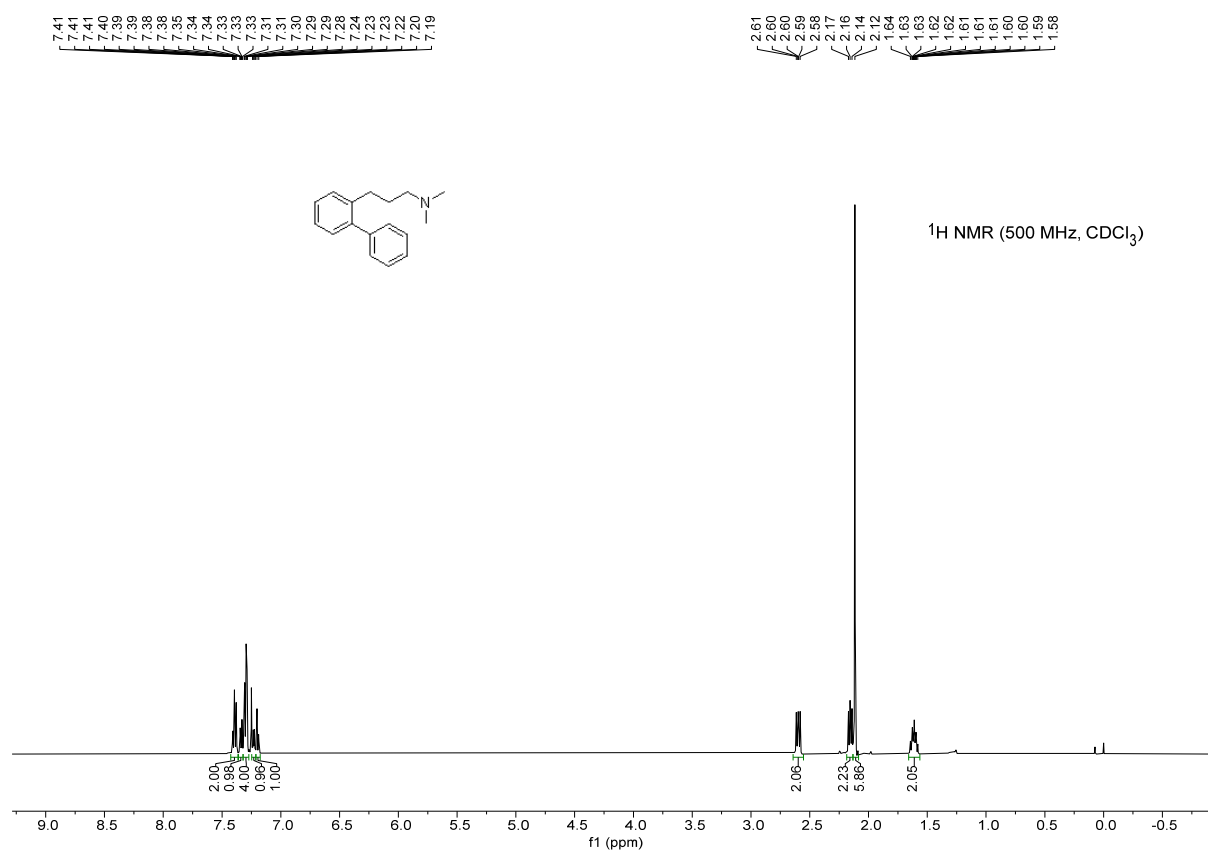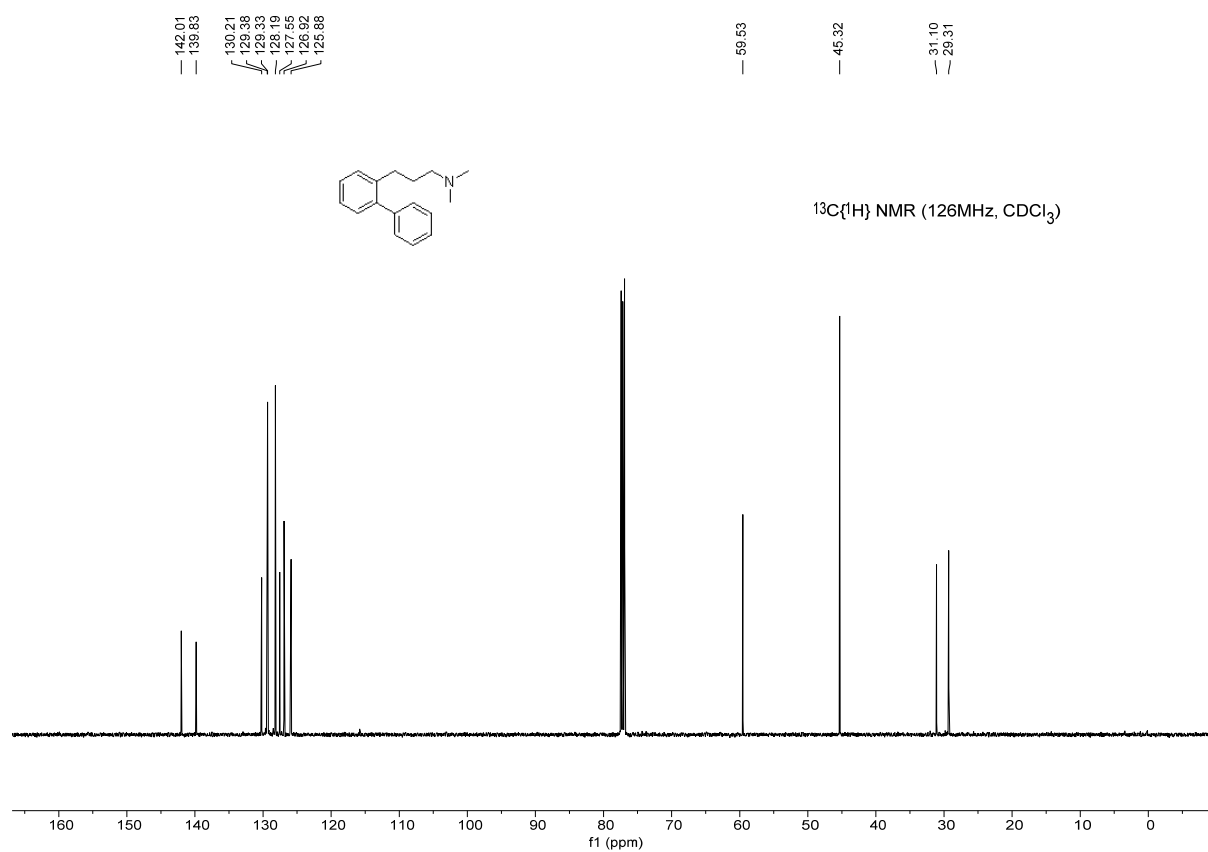

(2) N,N-dimethyl-3-(4-methyl-[1,1'-biphenyl]-2-yl)propan-1-amine (**3b**)

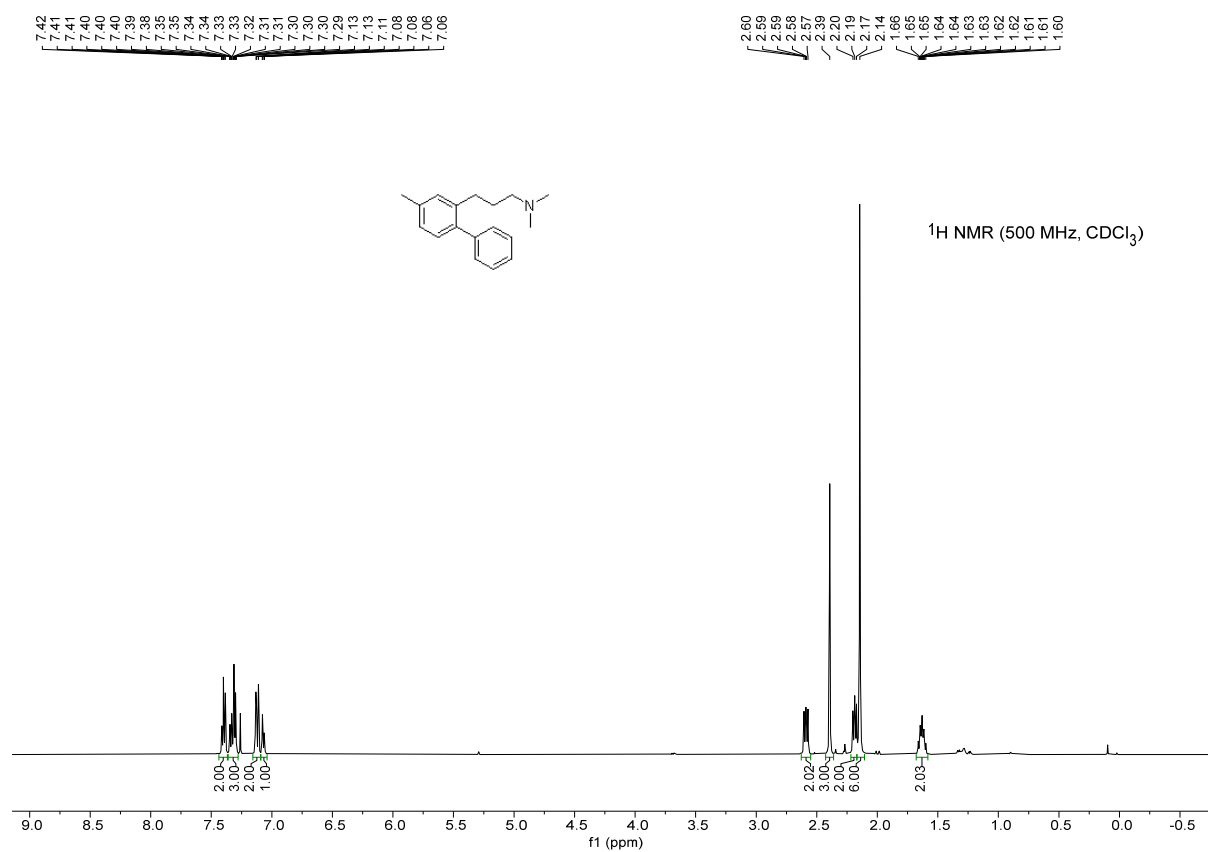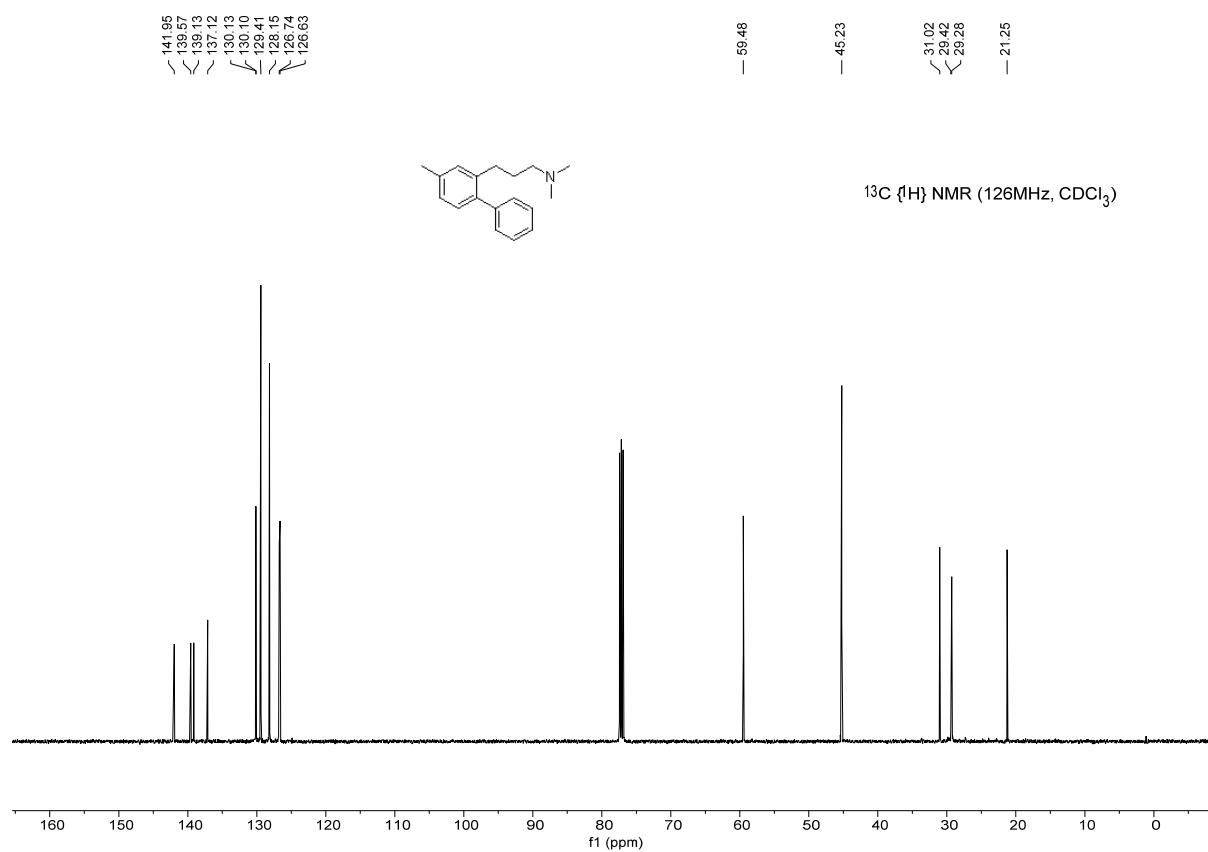

(3) 3-(4-methoxy-[1,1'-biphenyl]-2-yl)-N,N-dimethylpropan-1-amine (3c)

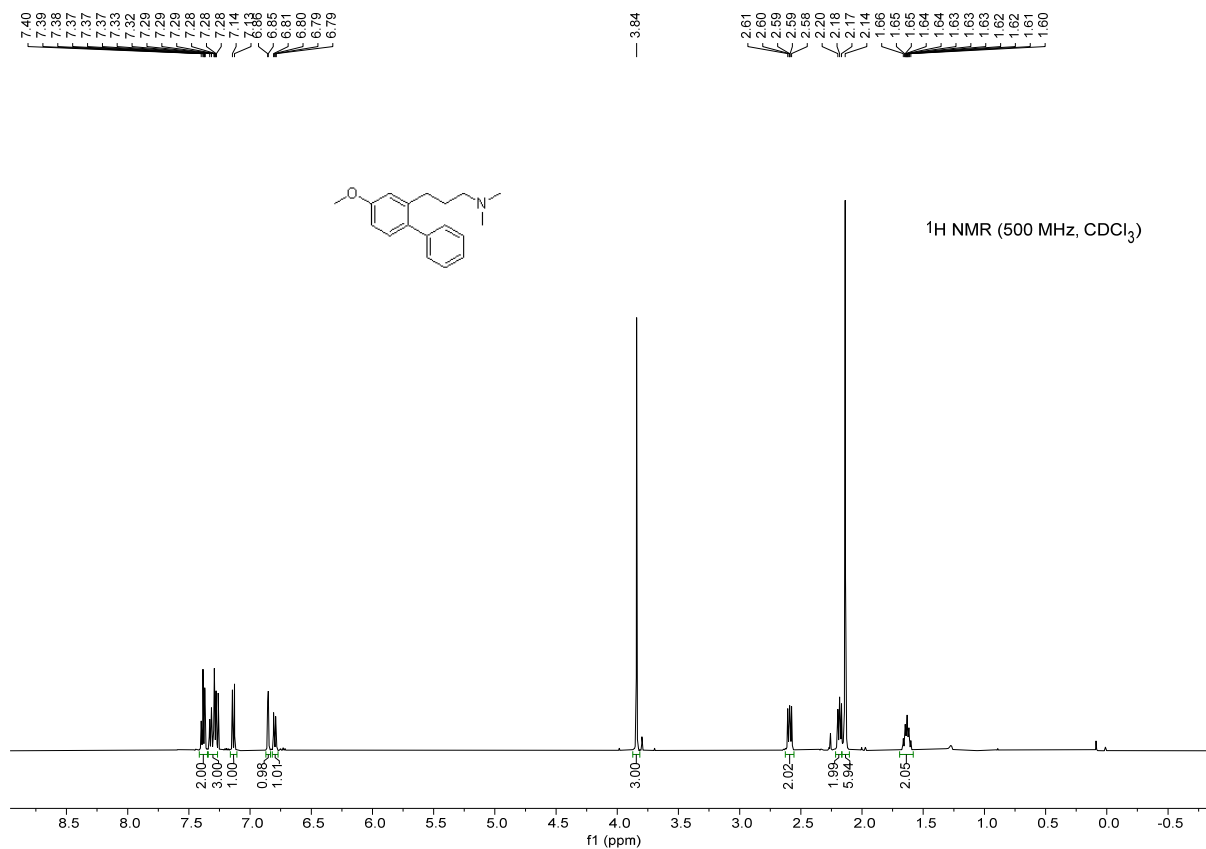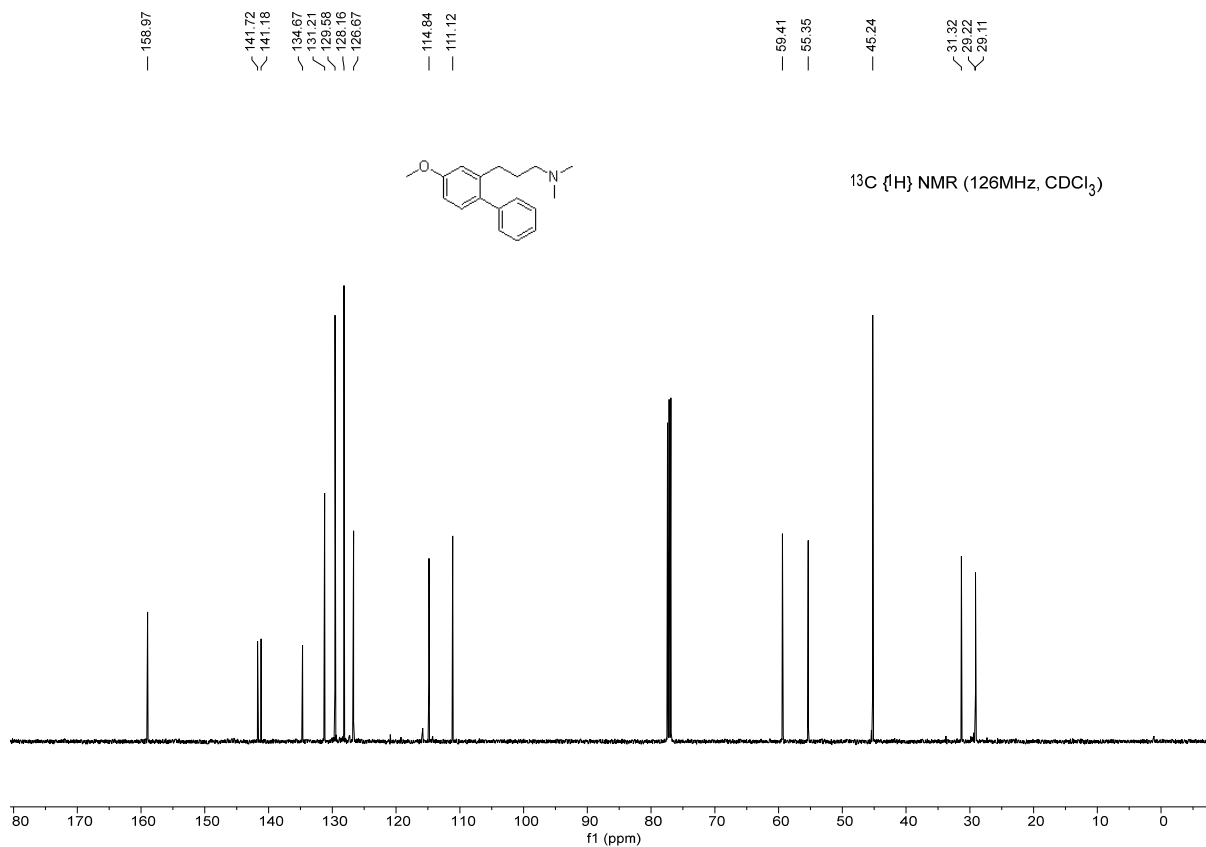



(4) 3-([1,1':4',1''-terphenyl]-2'-yl)-N,N-dimethylpropan-1-amine (**3d**)

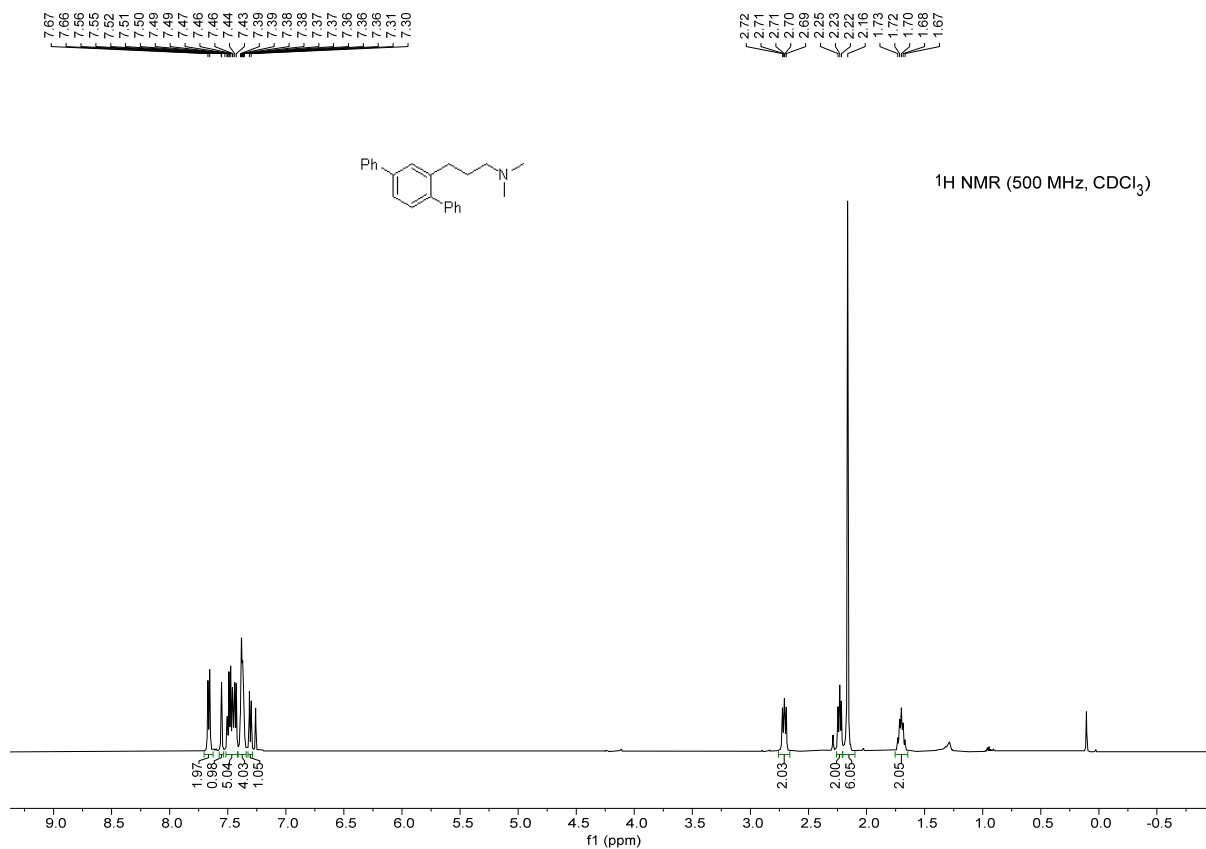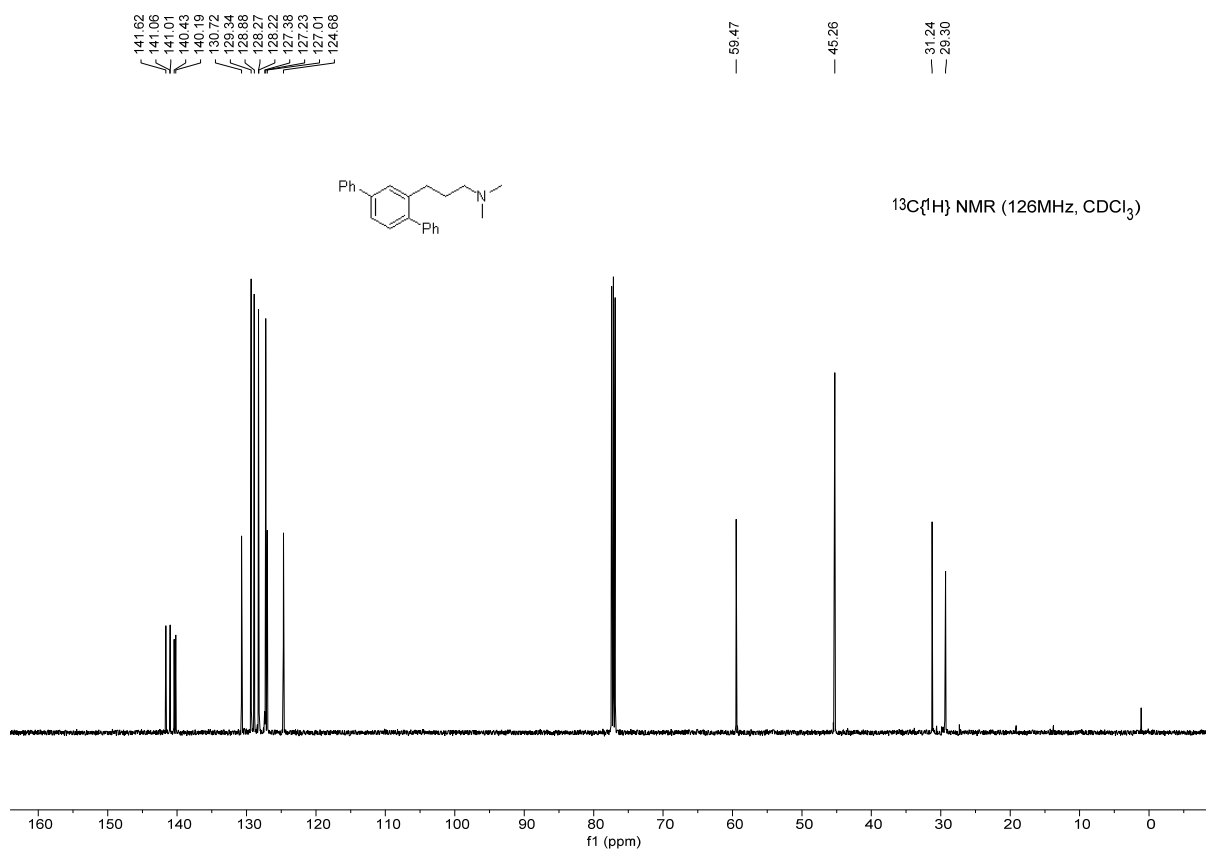

(5) N,N-dimethyl-3-(3-methyl-[1,1'-biphenyl]-2-yl)propan-1-amine (**3e**)

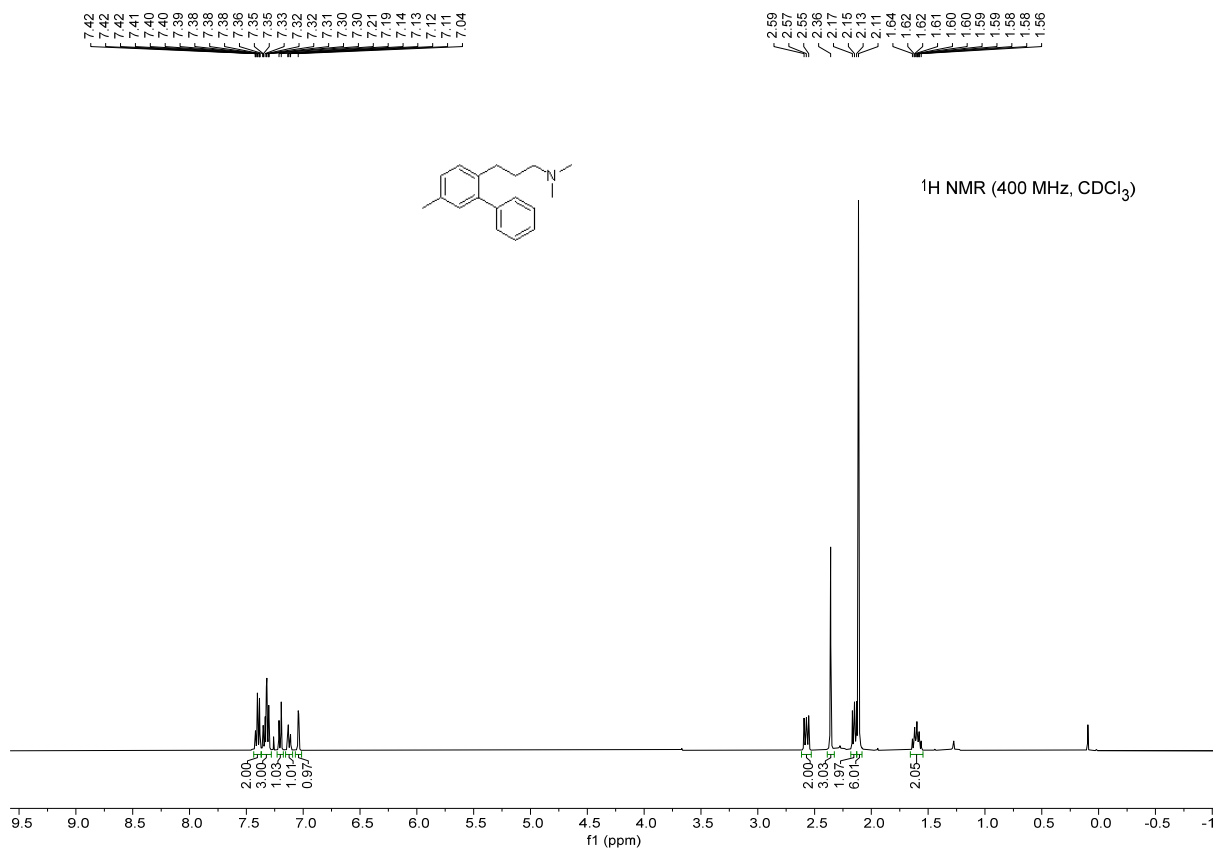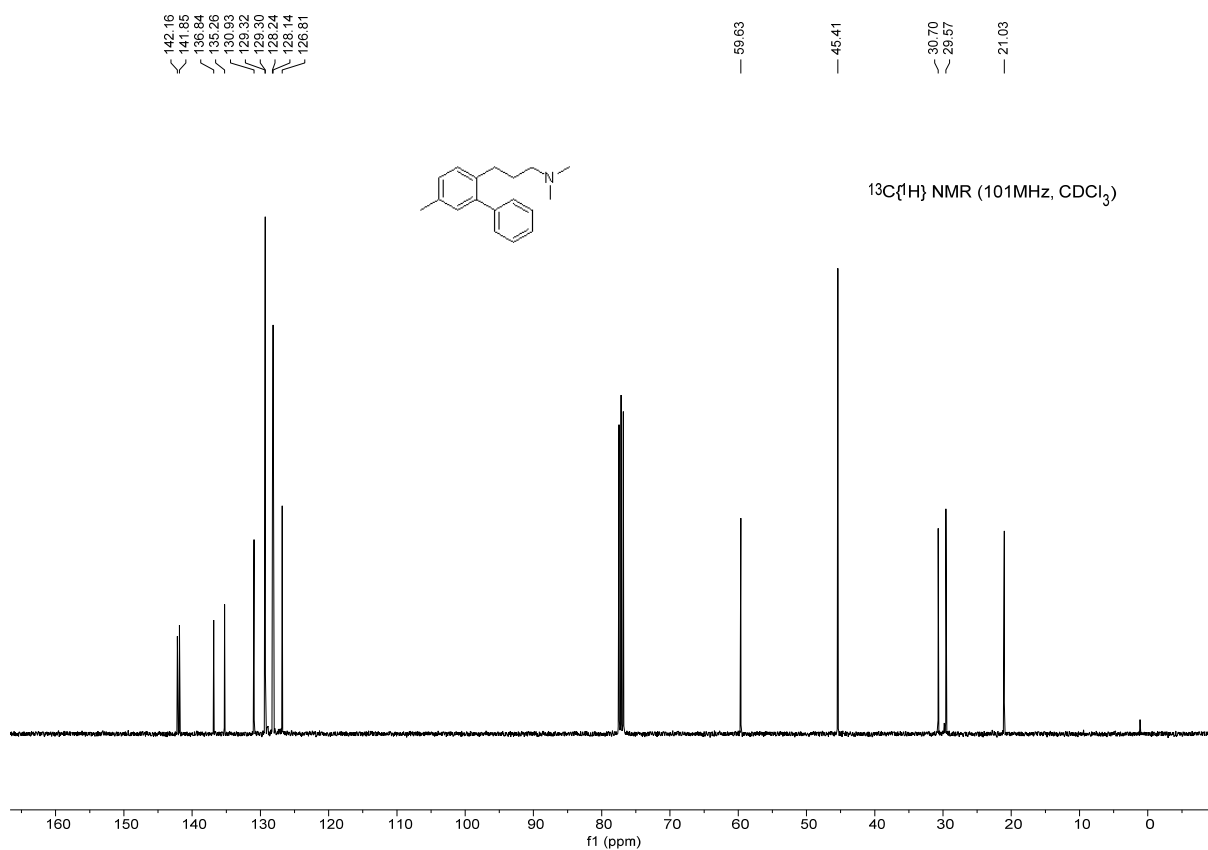

(6) 3-([1,1':3',1''-terphenyl]-4'-yl)-N,N-dimethylpropan-1-amine (**3f**)

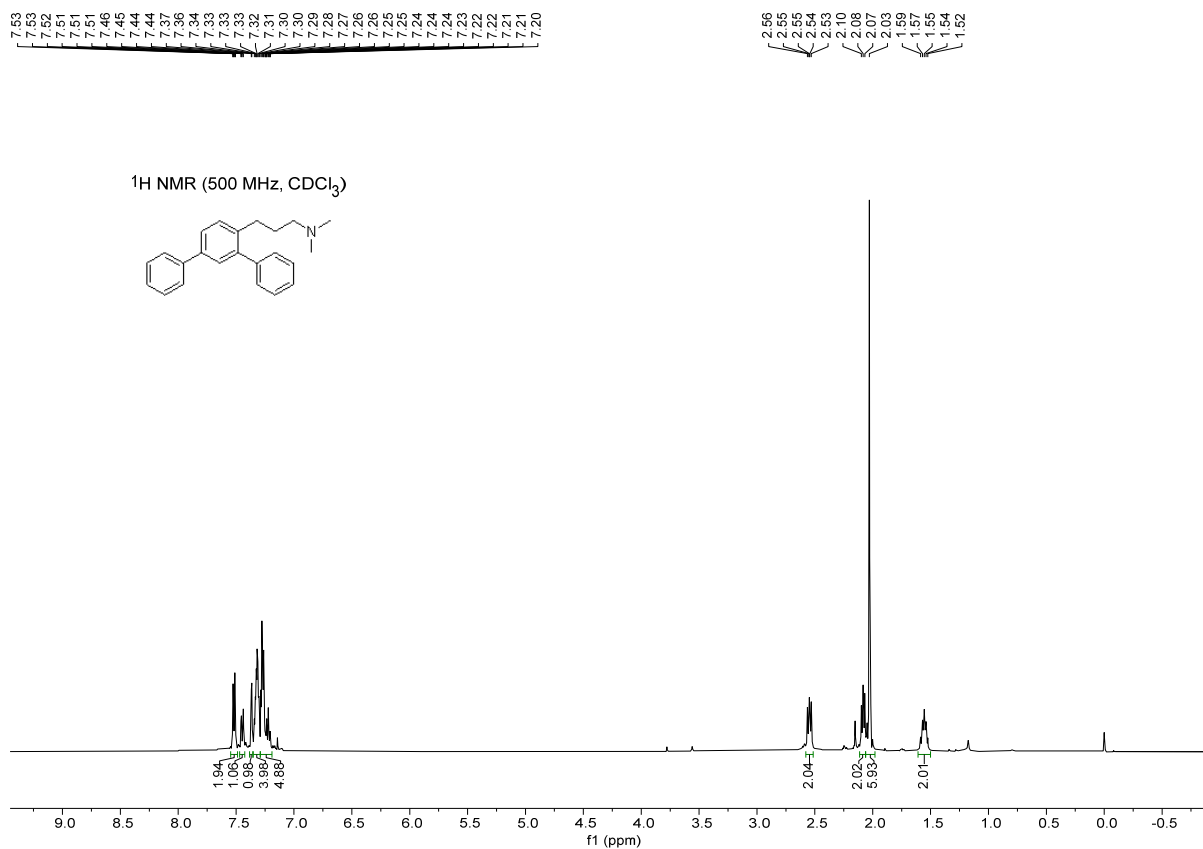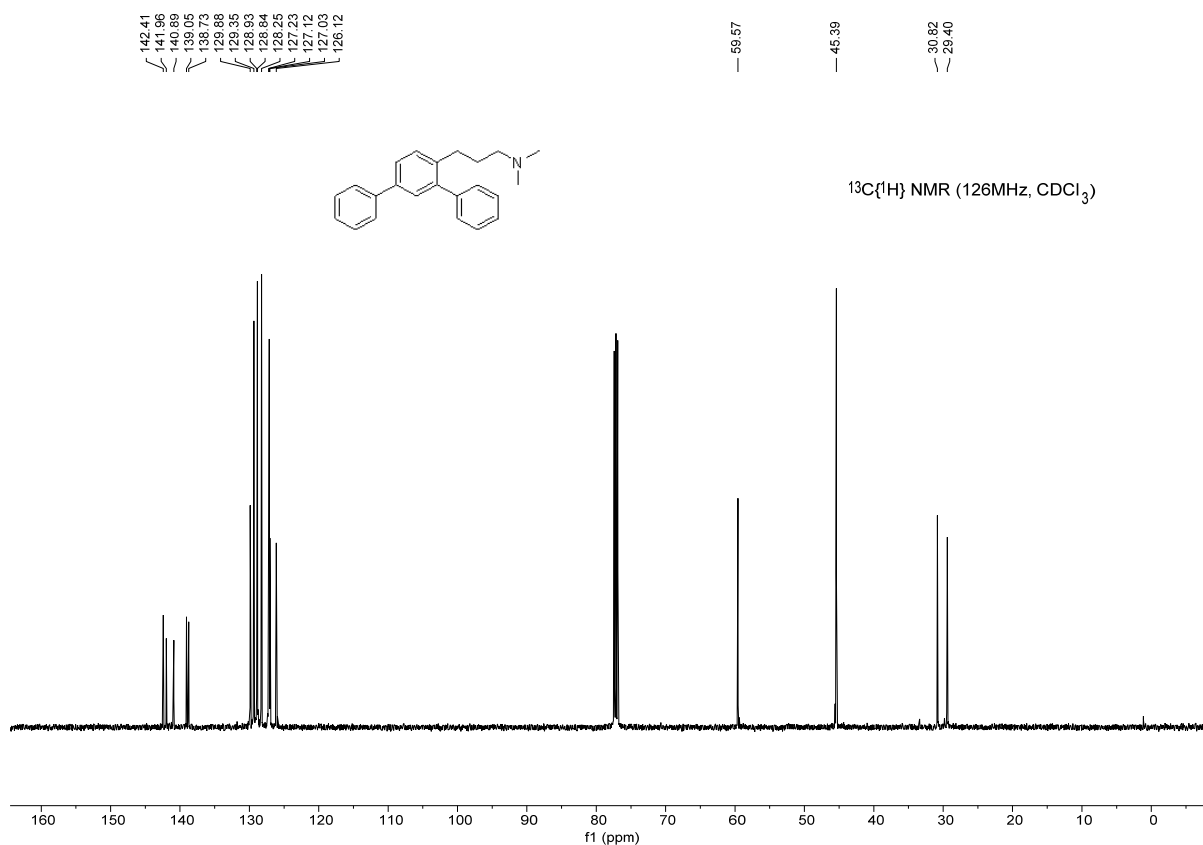

(7) 4-([1,1'-biphenyl]-2-yl)-N,N-dimethylbutan-2-amine (3g)

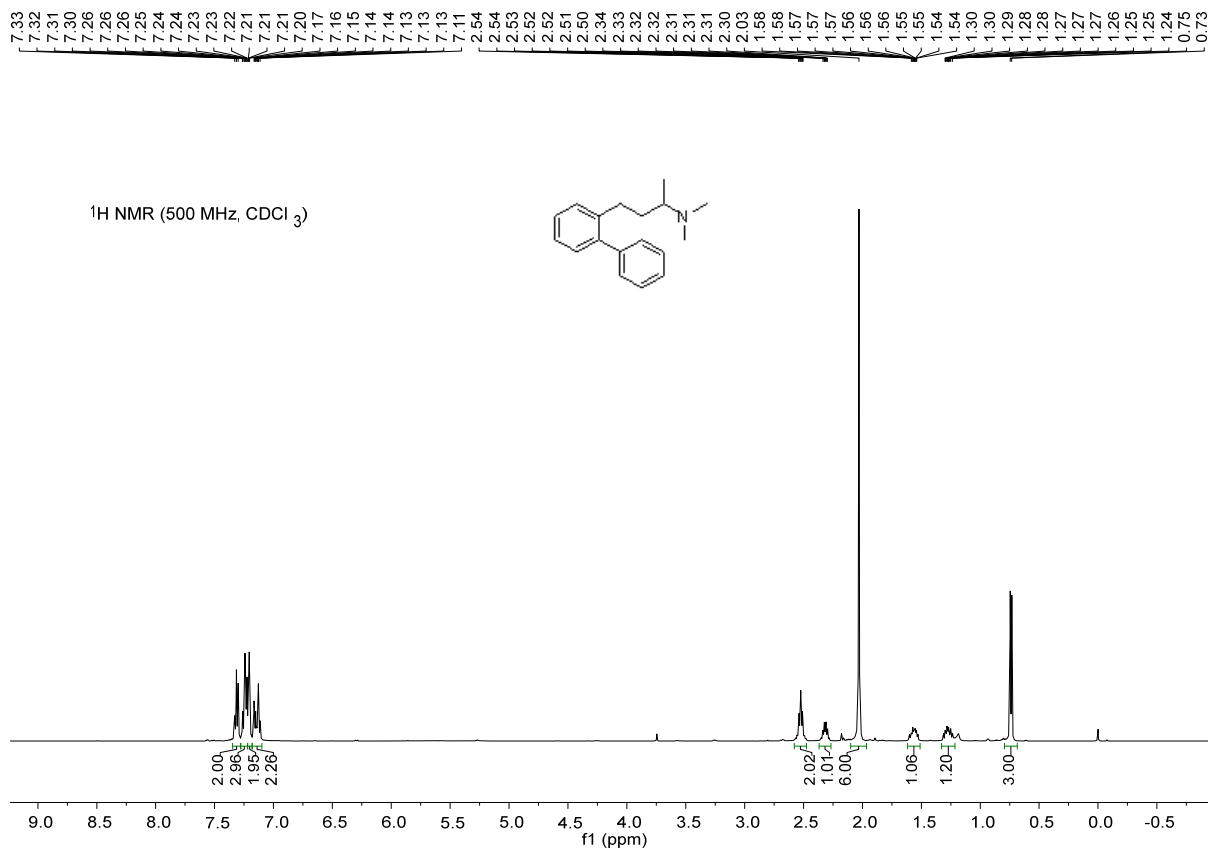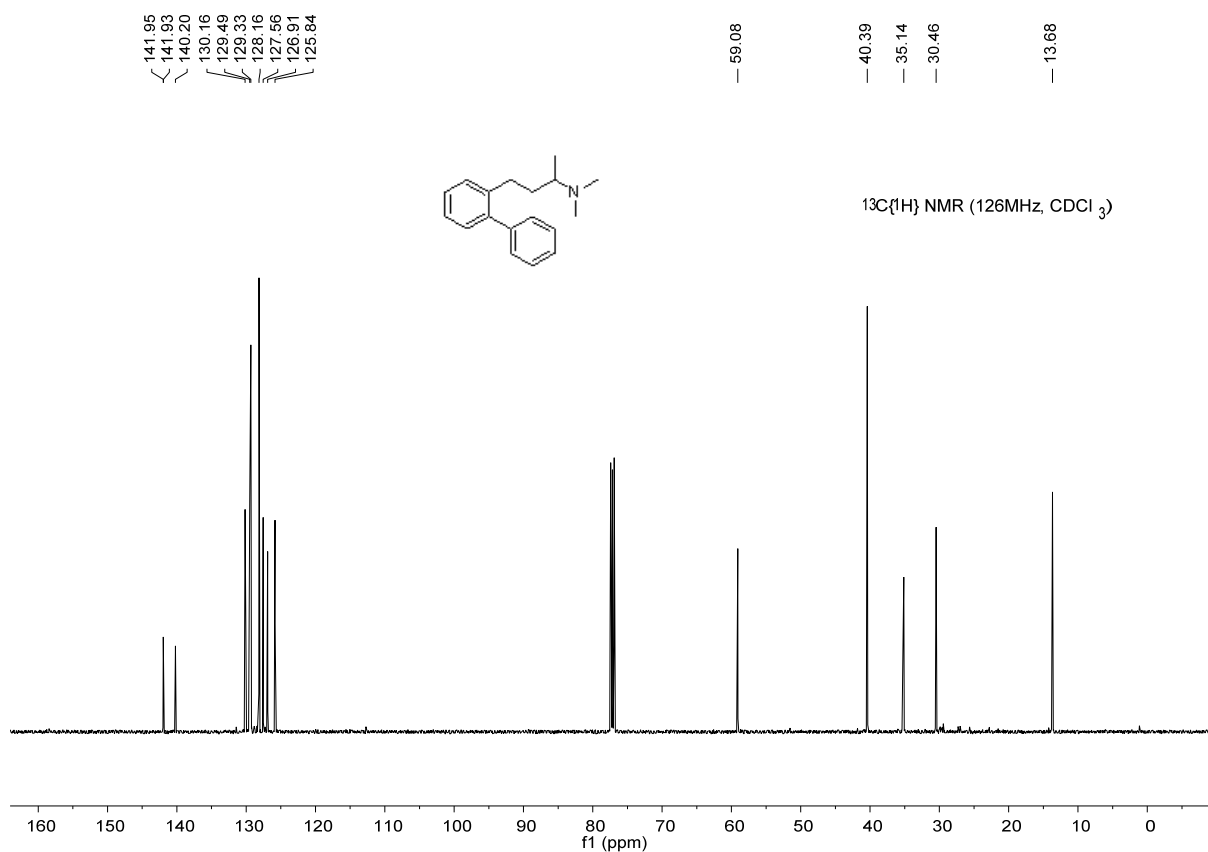

(8) 3-([1,1'-biphenyl]-2-yl)-N,N,2-trimethylpropan-1-amine (**3h**)

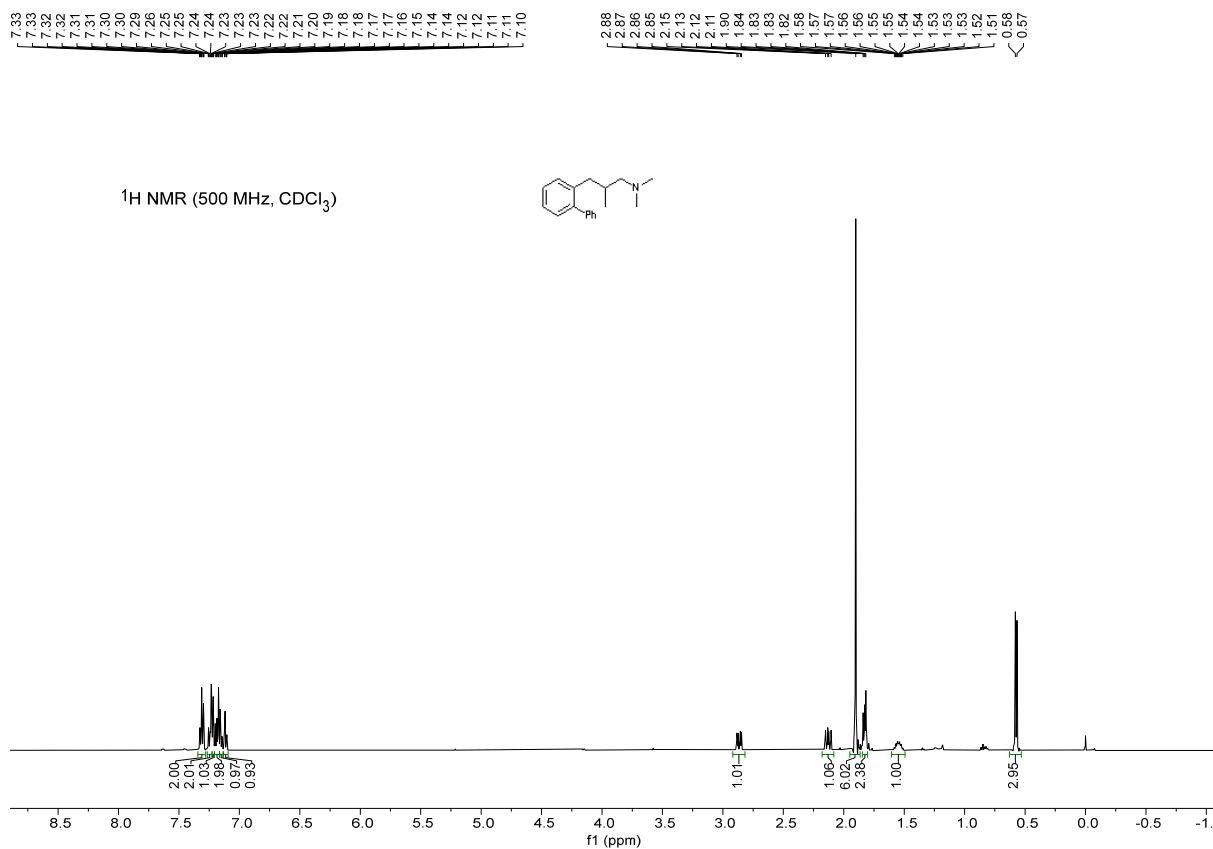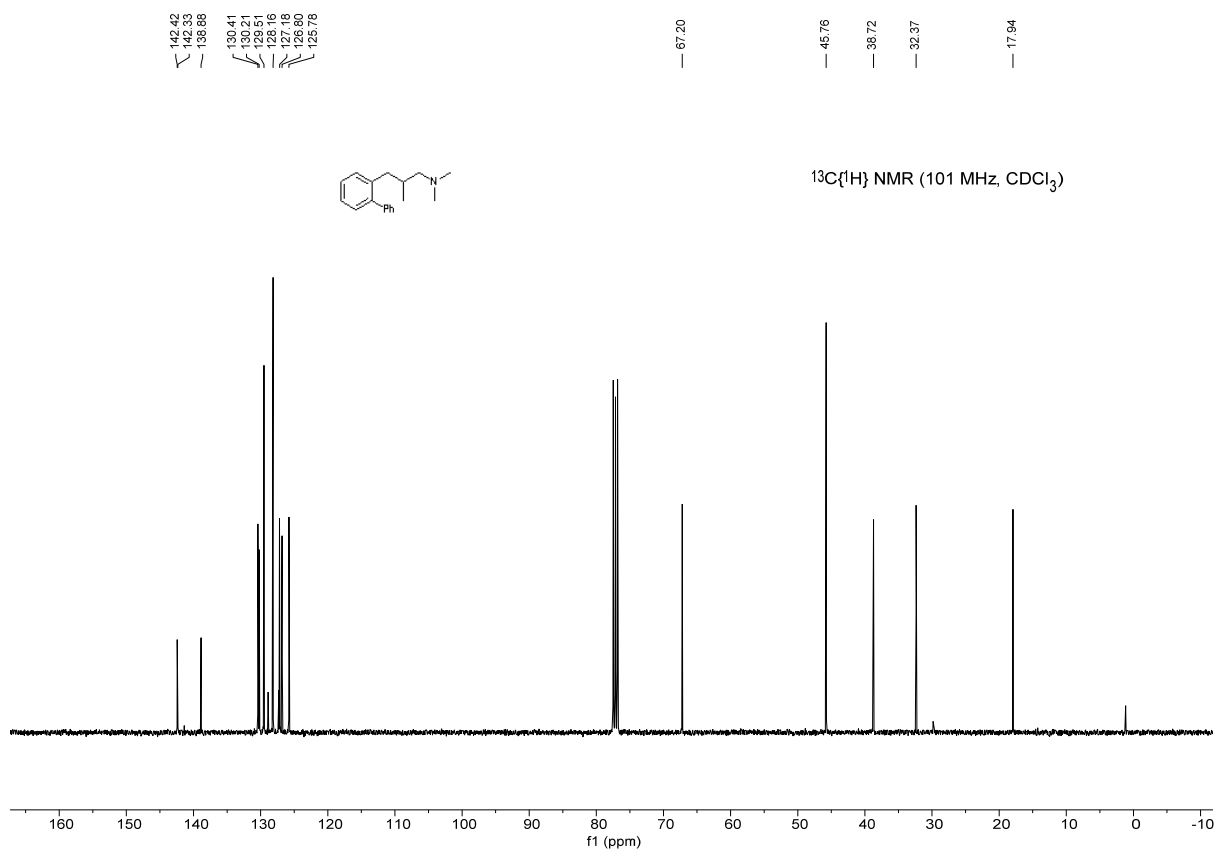

(9) 3-([1,1'-biphenyl]-2-yl)-N,N-dimethylbutan-1-amine (**3i**)

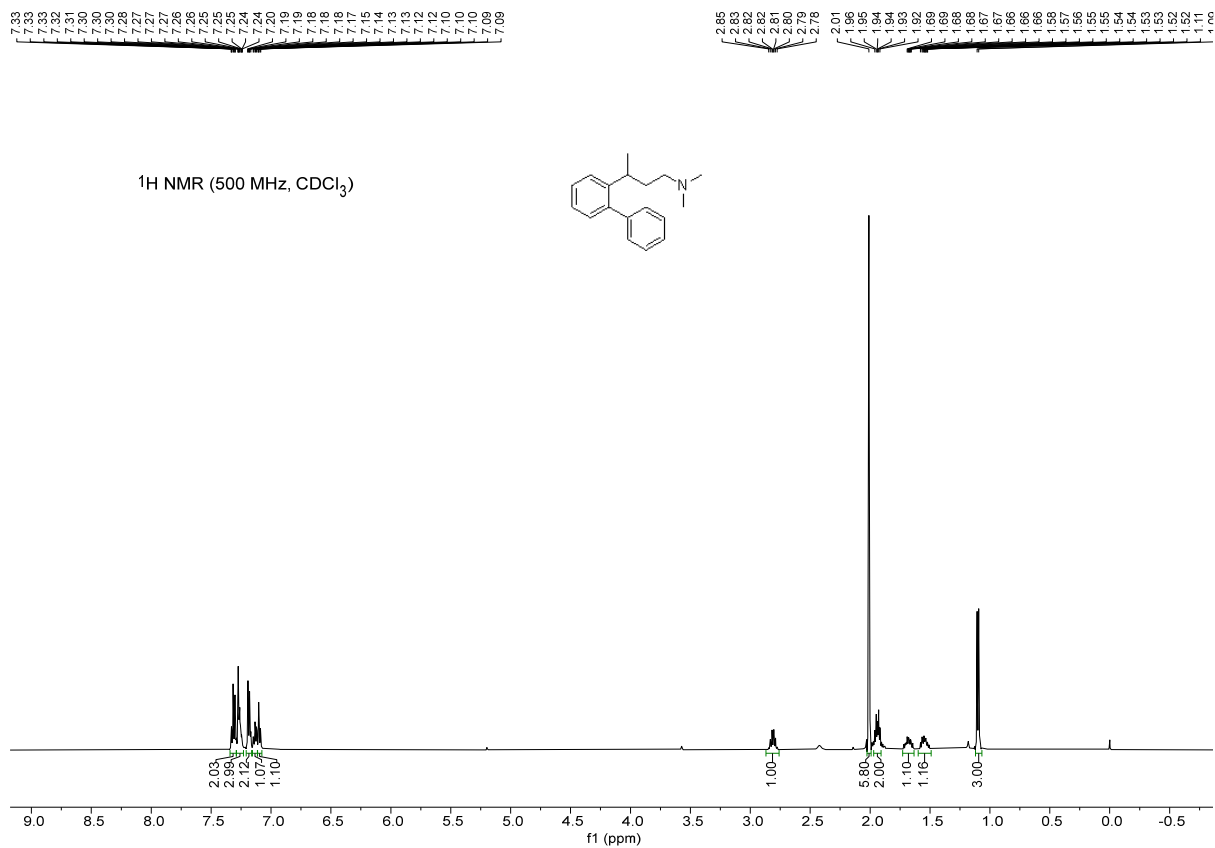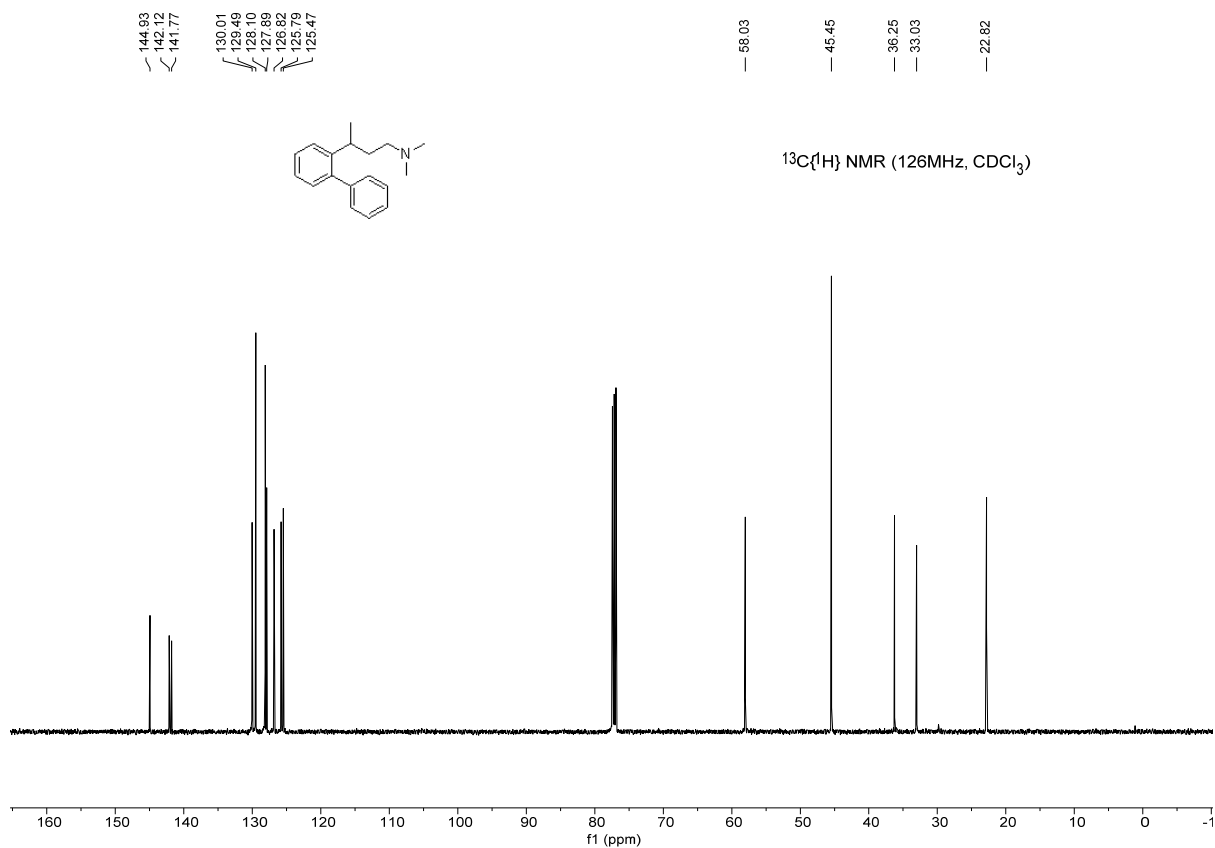

(10) 2-([1,1'-biphenyl]-2-yl)-N,N-dimethylethan-1-amine (**3j**)

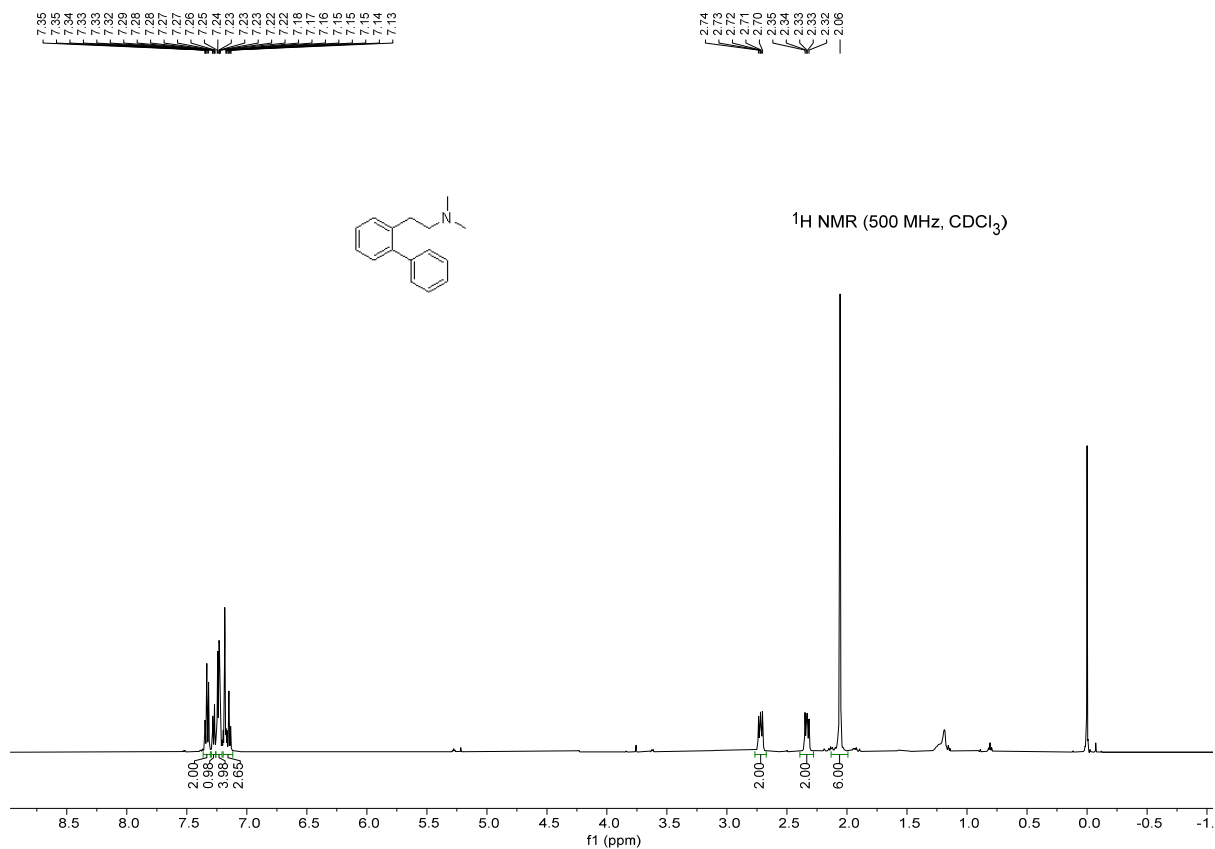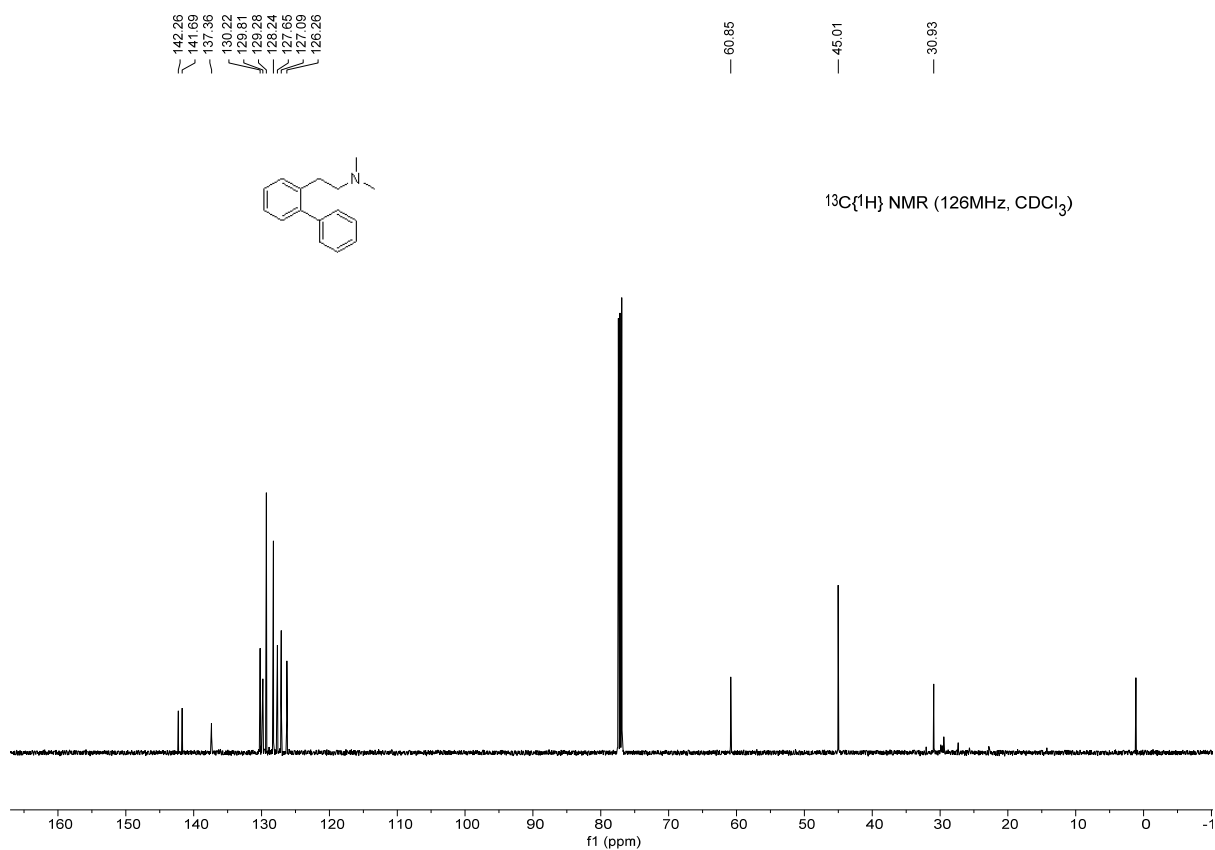

(11) 4-([1,1'-biphenyl]-2-yl)-N,N-dimethylbutan-1-amine (**3k**)

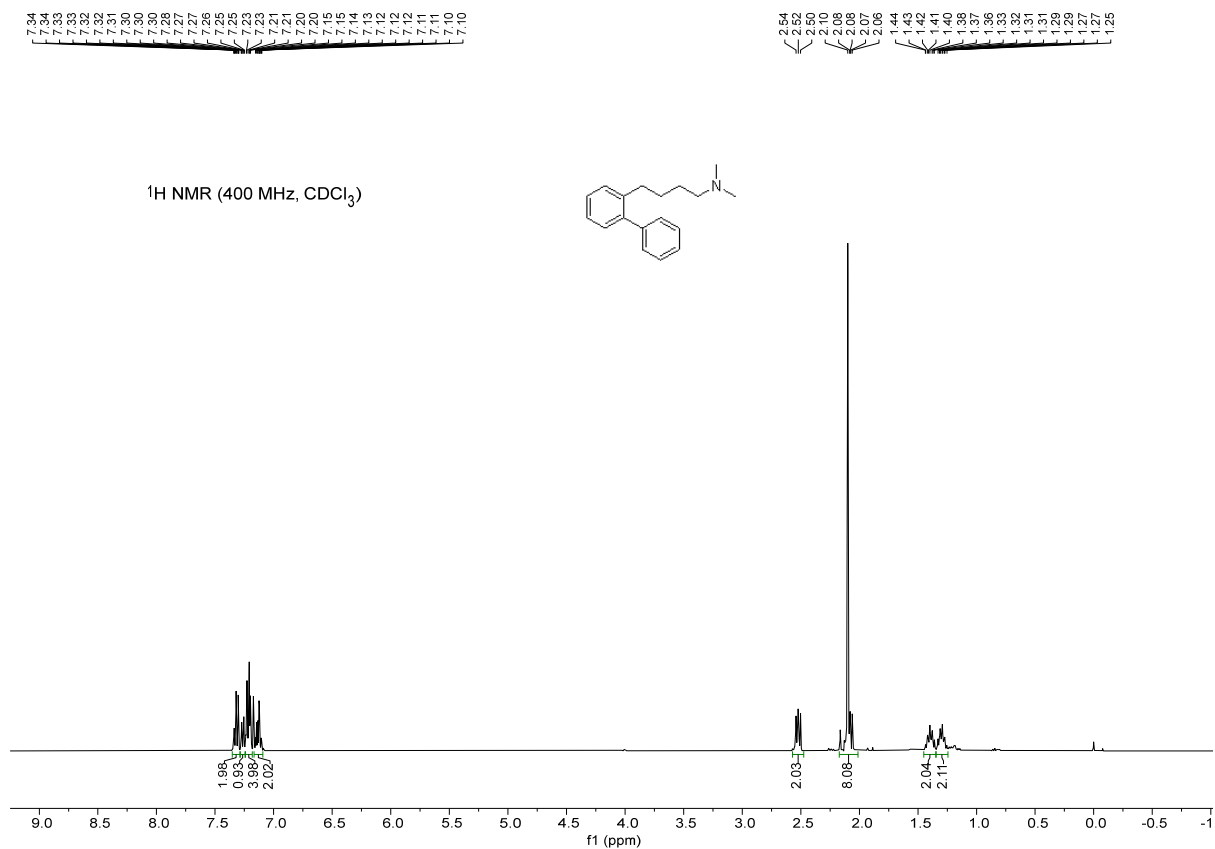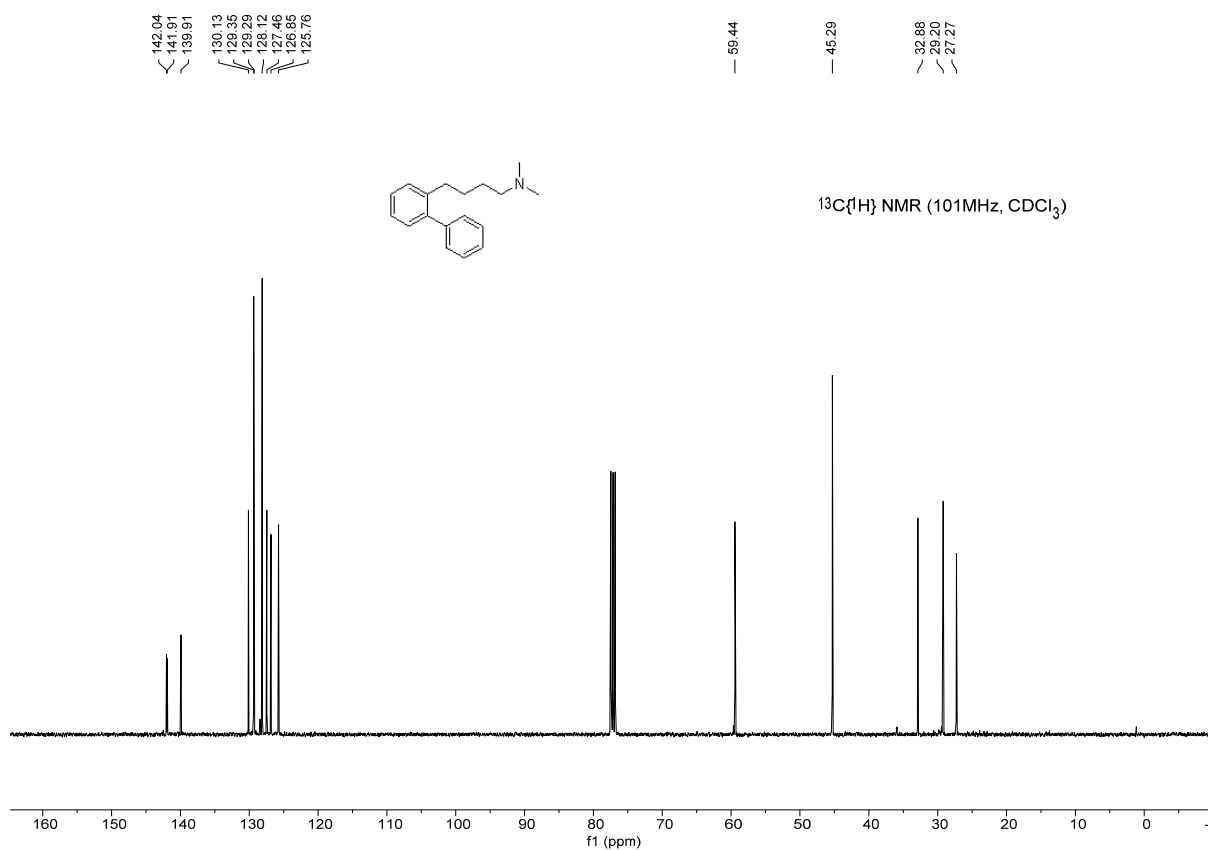



(12) N,N-dimethyl-3-(4'-methyl-[1,1'-biphenyl]-2-yl)propan-1-amine (**31**)

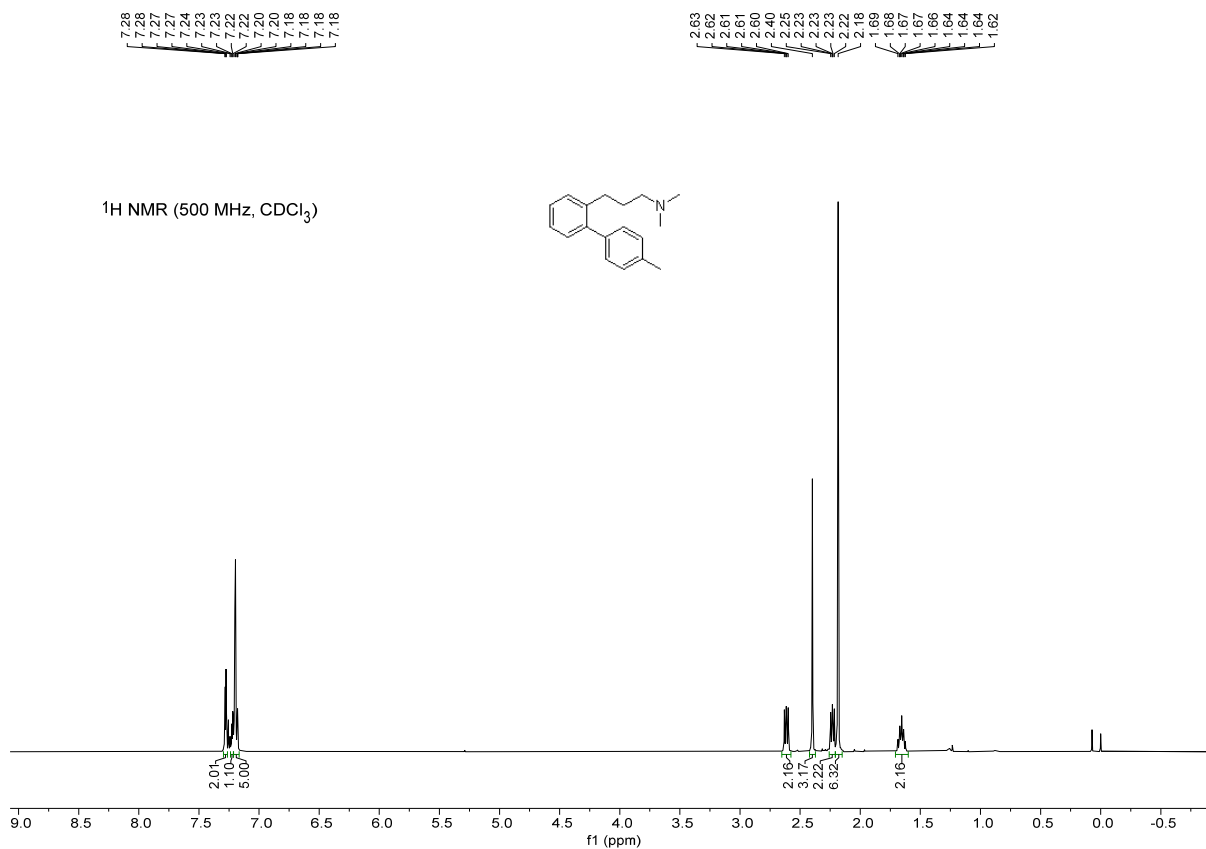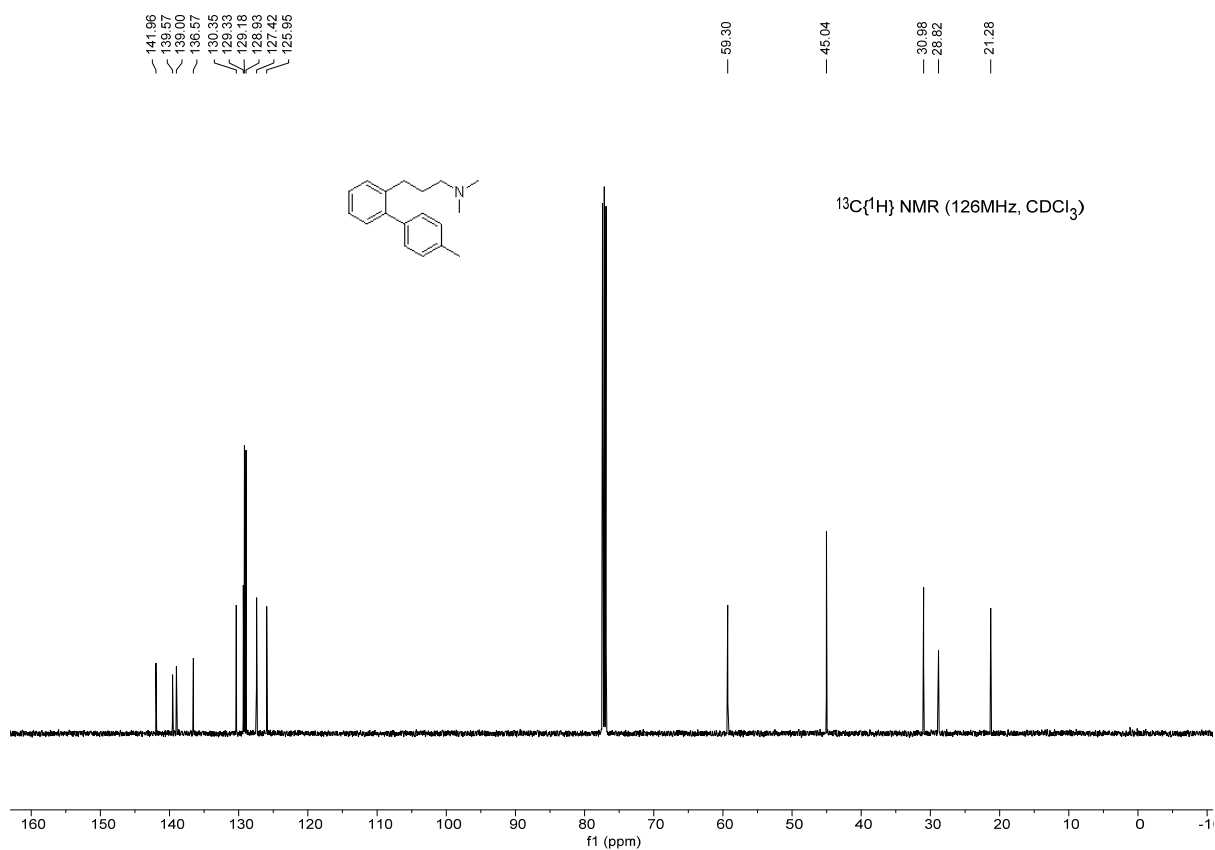

(13) 3-(4'-(tert-butyl)-[1,1'-biphenyl]-2-yl)-N,N-dimethylpropan-1-amine (**3m**)

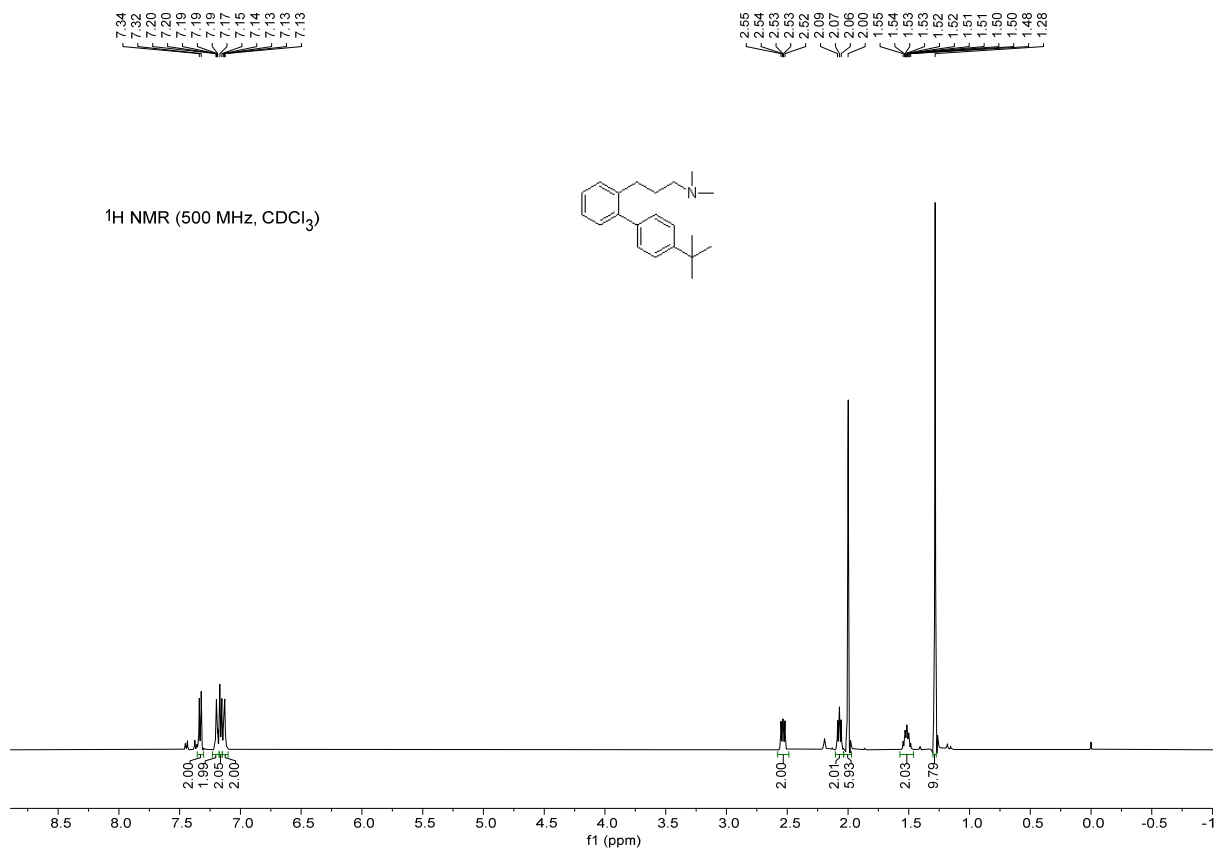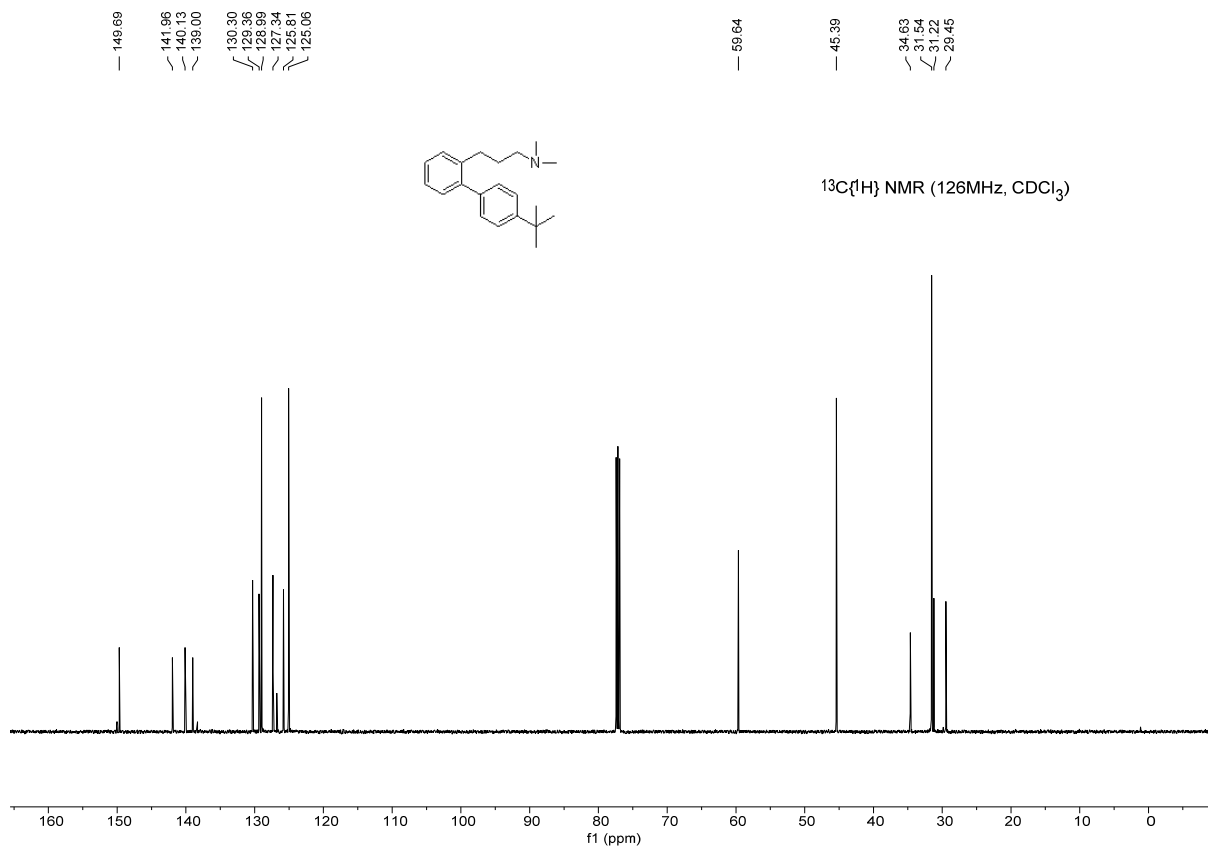

(14) 3-(4'-methoxy-[1,1'-biphenyl]-2-yl)-N,N-dimethylpropan-1-amine (**3n**)

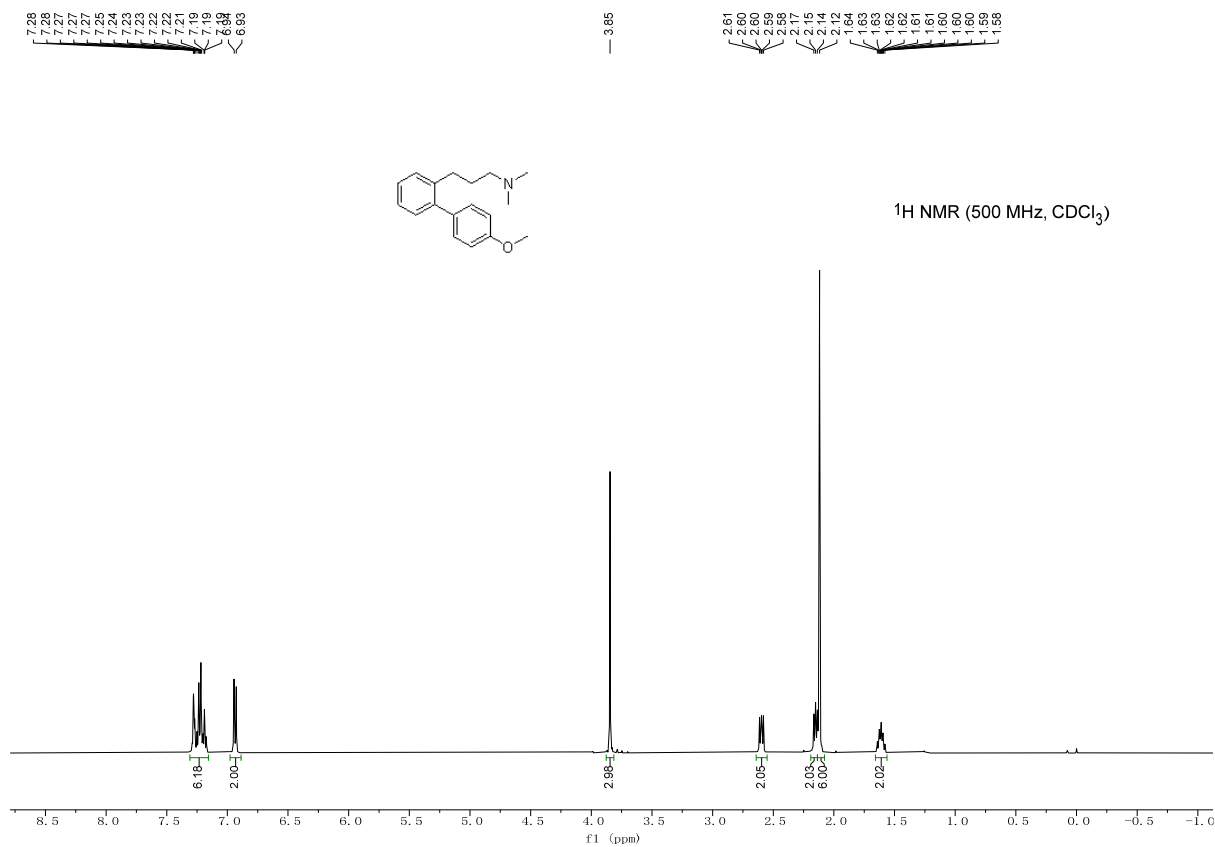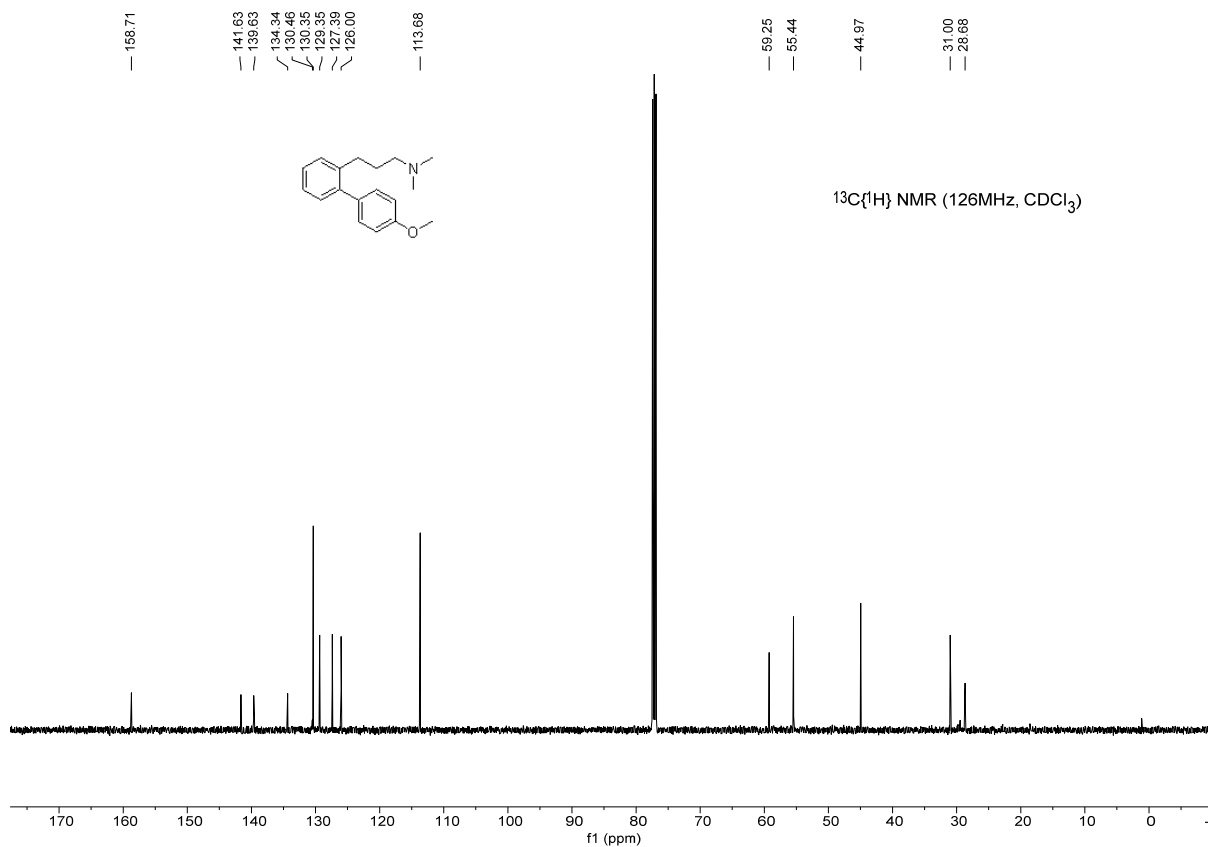

(15) 2'-(3-(dimethylamino)propyl)-N,N-dimethyl-[1,1'-biphenyl]-4-amine (**30**)

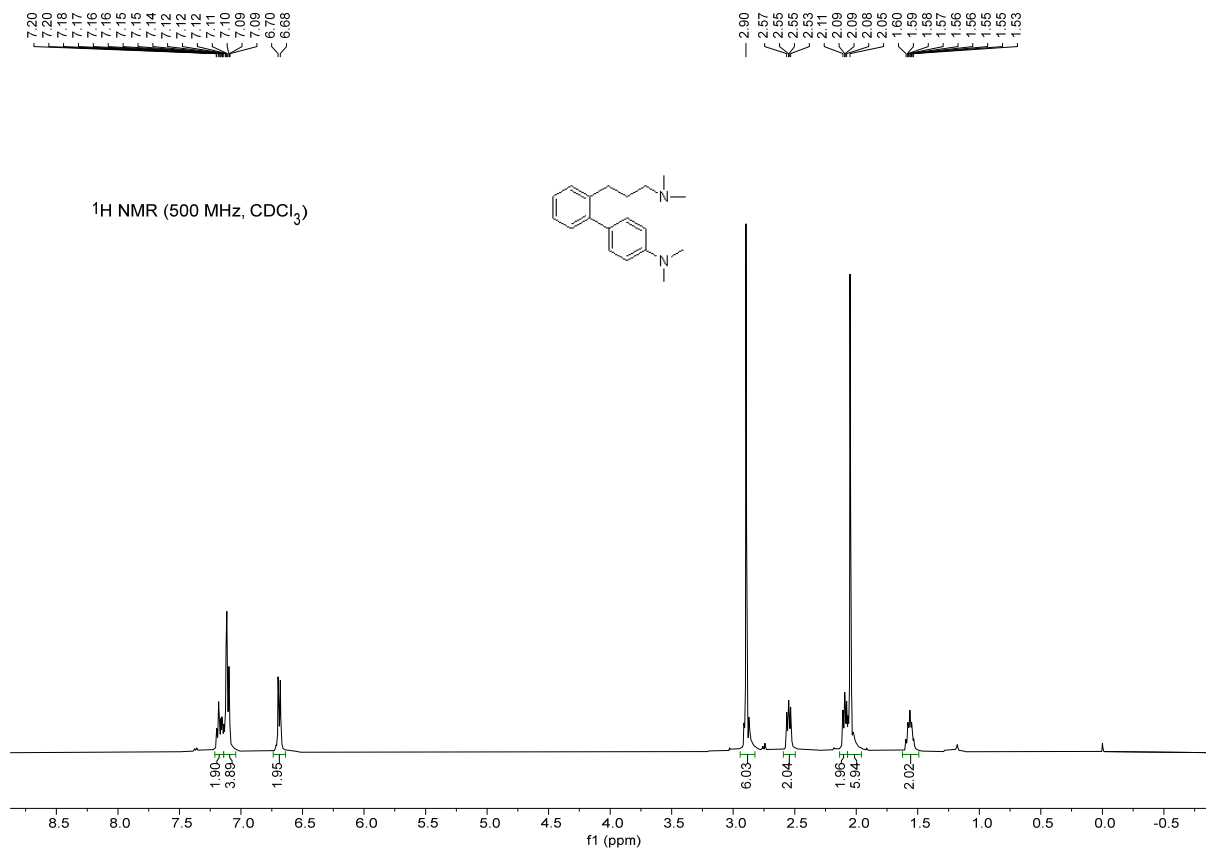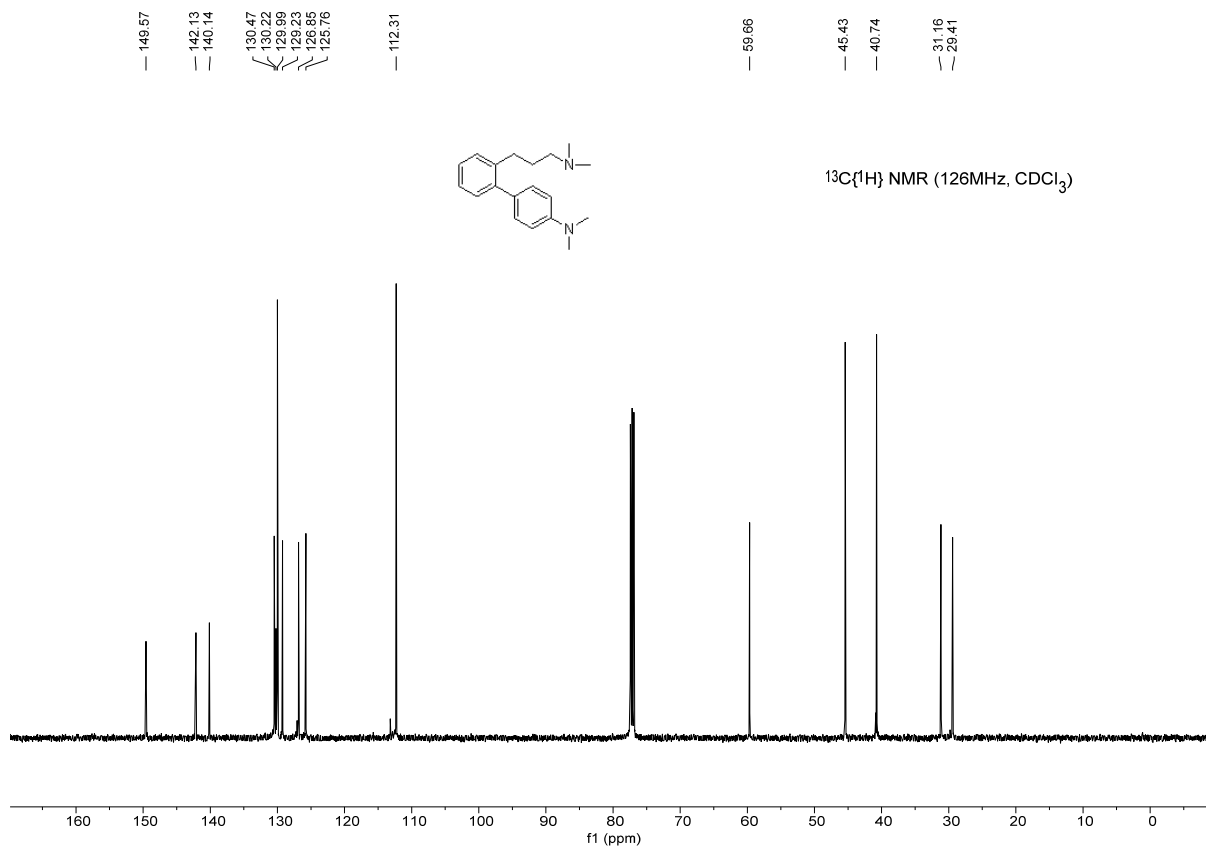

(16) 3-([1,1':4',1''-terphenyl]-2-yl)-N,N-dimethylpropan-1-amine (**3p**)

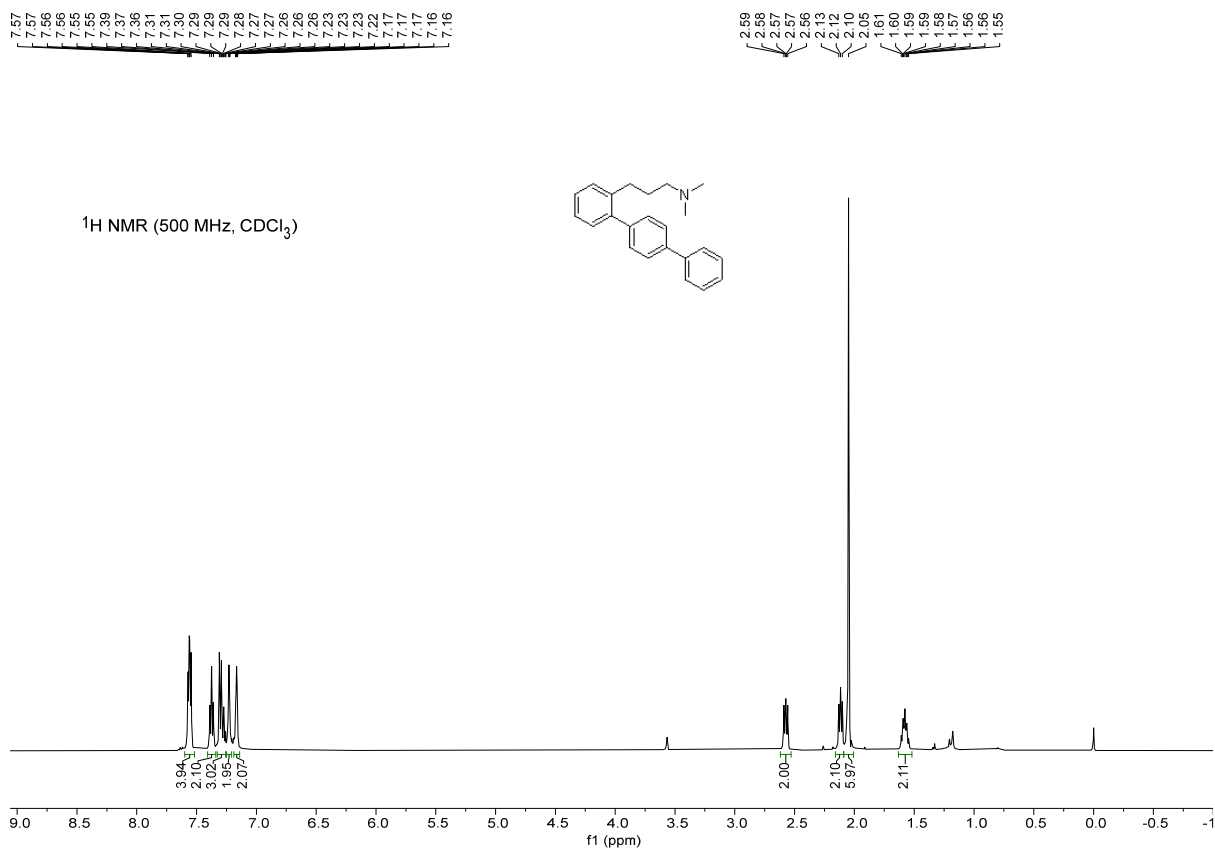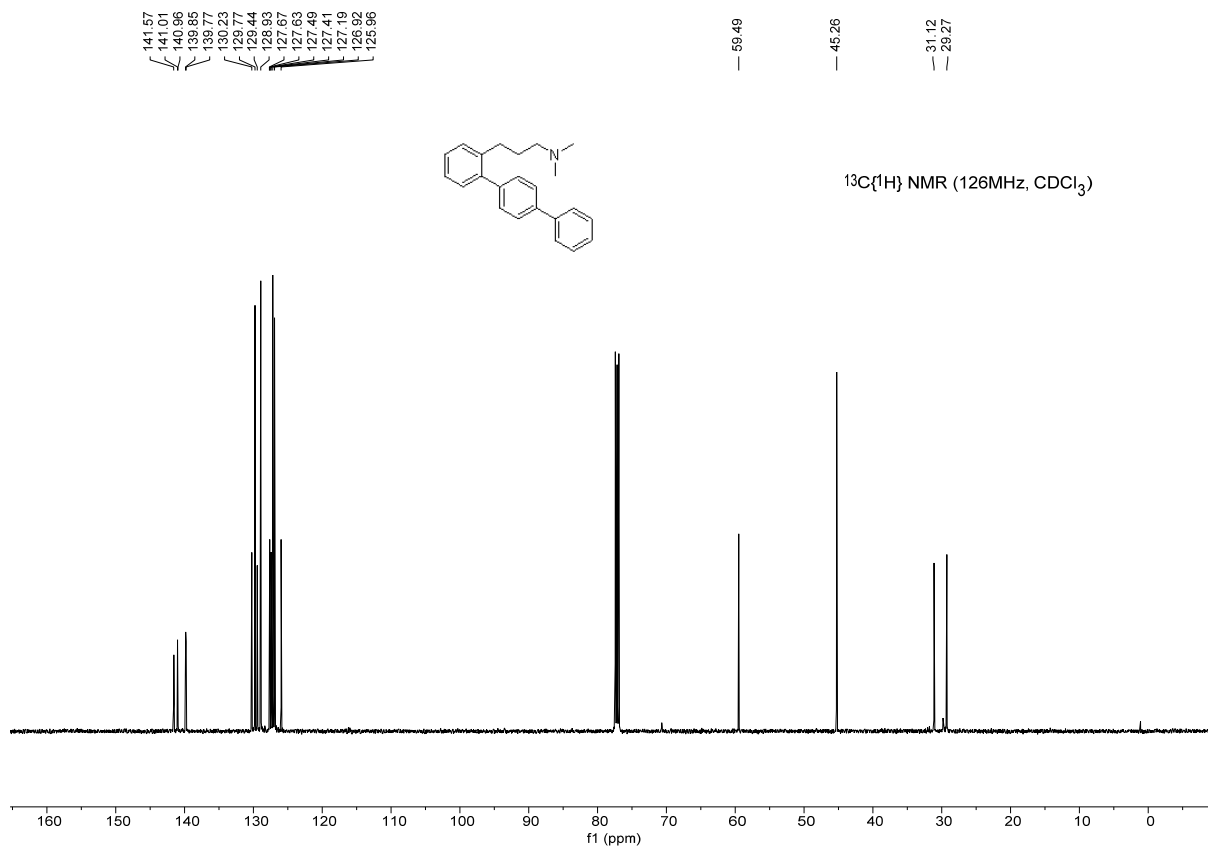

(17) N,N-dimethyl-3-(3'-methyl-[1,1'-biphenyl]-2-yl)propan-1-amine (**3q**)

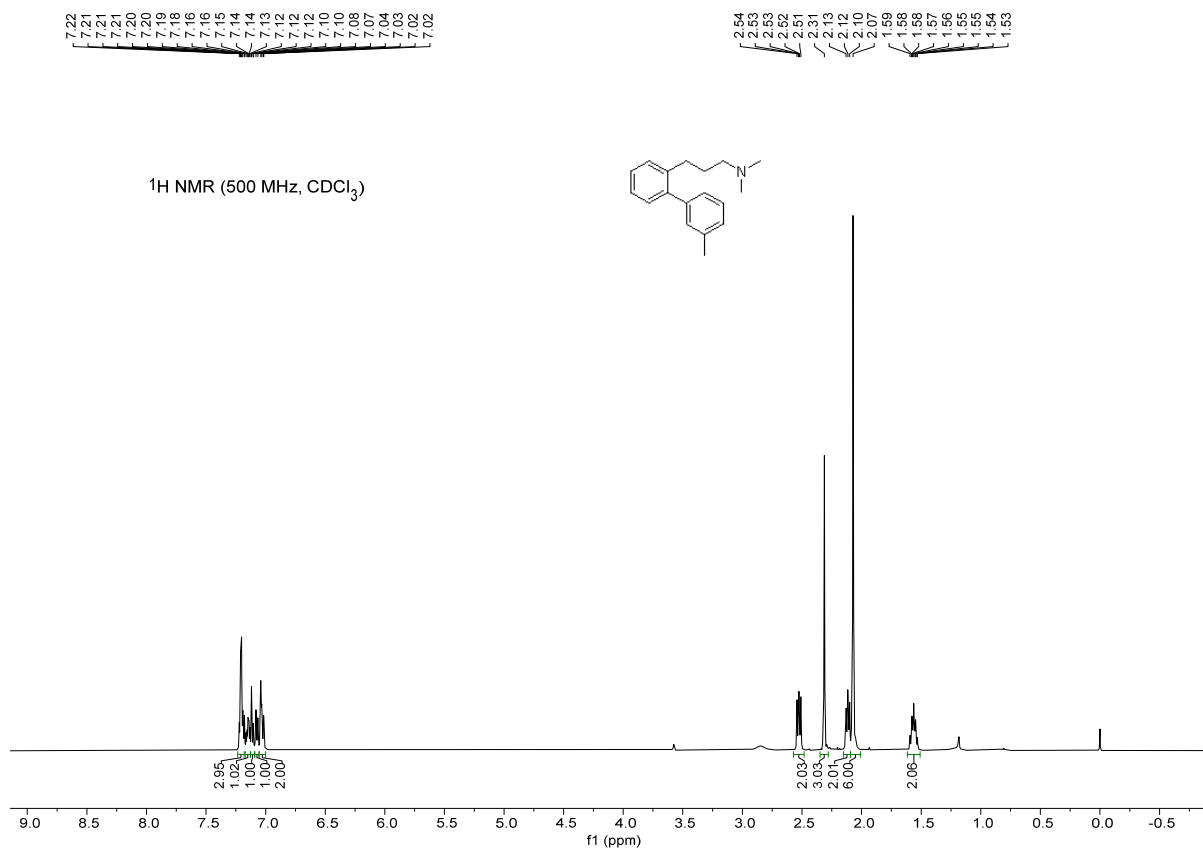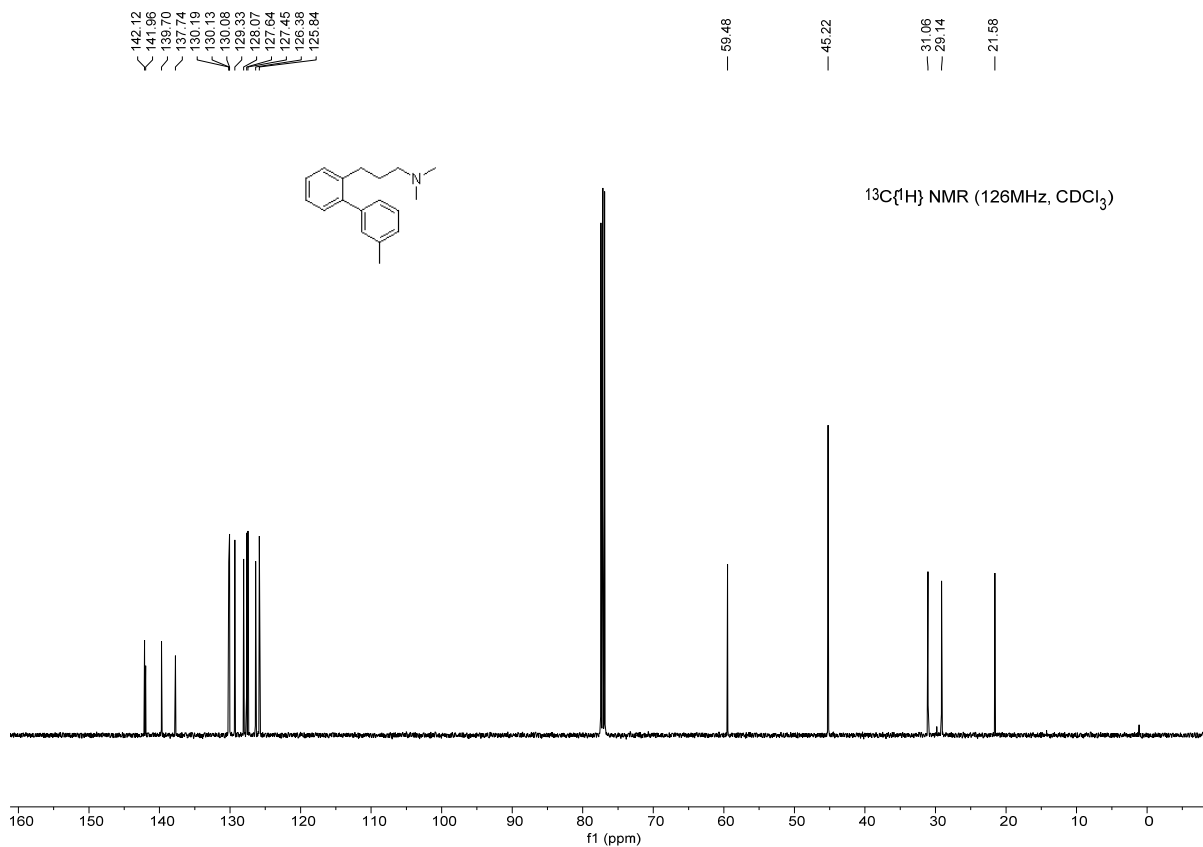

(18) 3-(3',5'-dimethyl-[1,1'-biphenyl]-2-yl)-N,N-dimethylpropan-1-amine (**3r**)

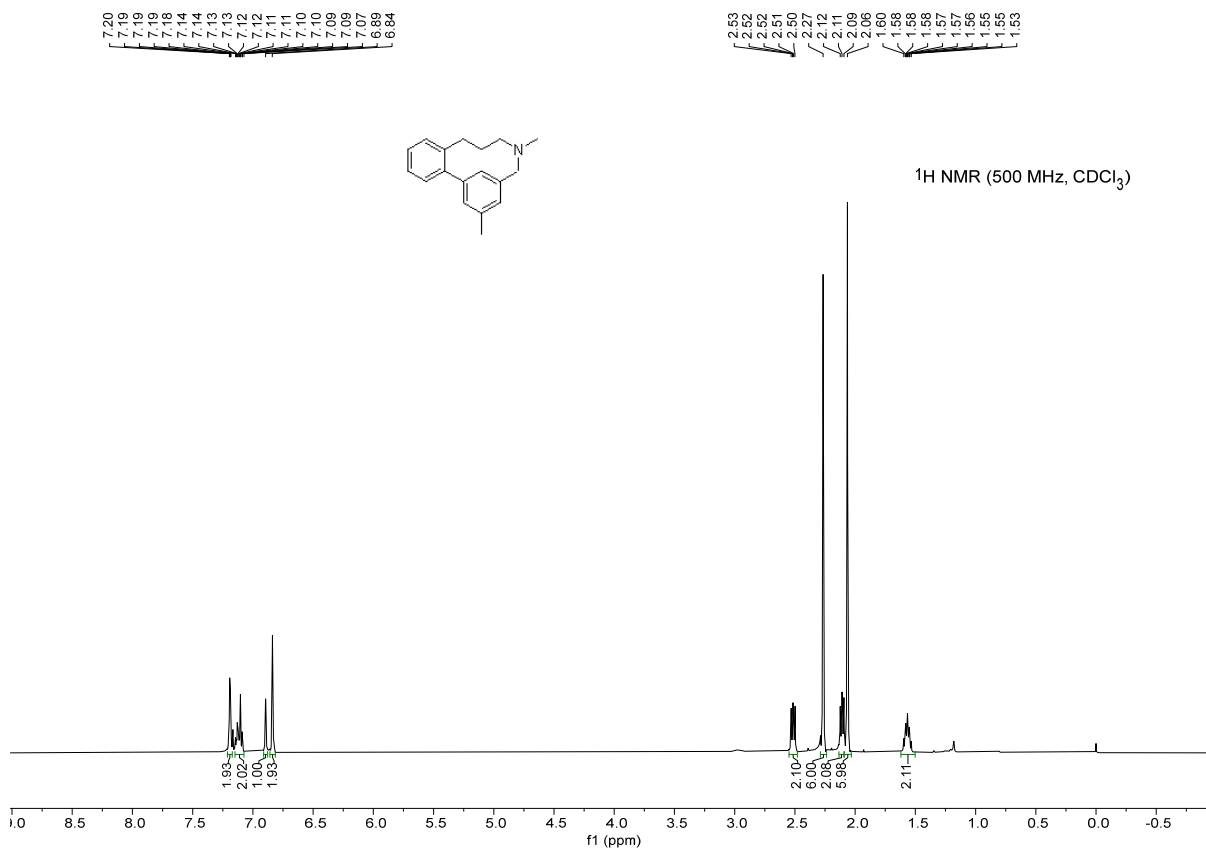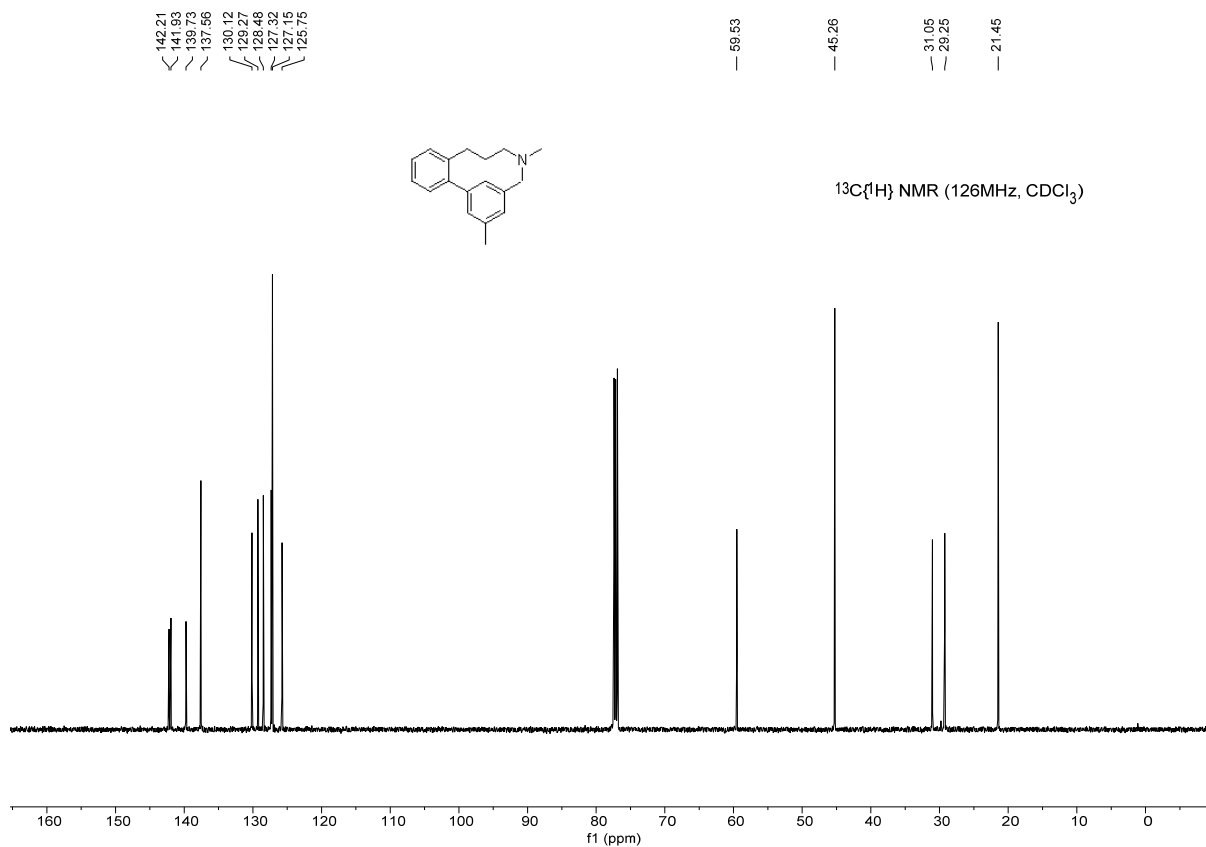

(19) N,N-dimethyl-3-(2-(naphthalen-2-yl)phenyl)propan-1-amine (**3s**)

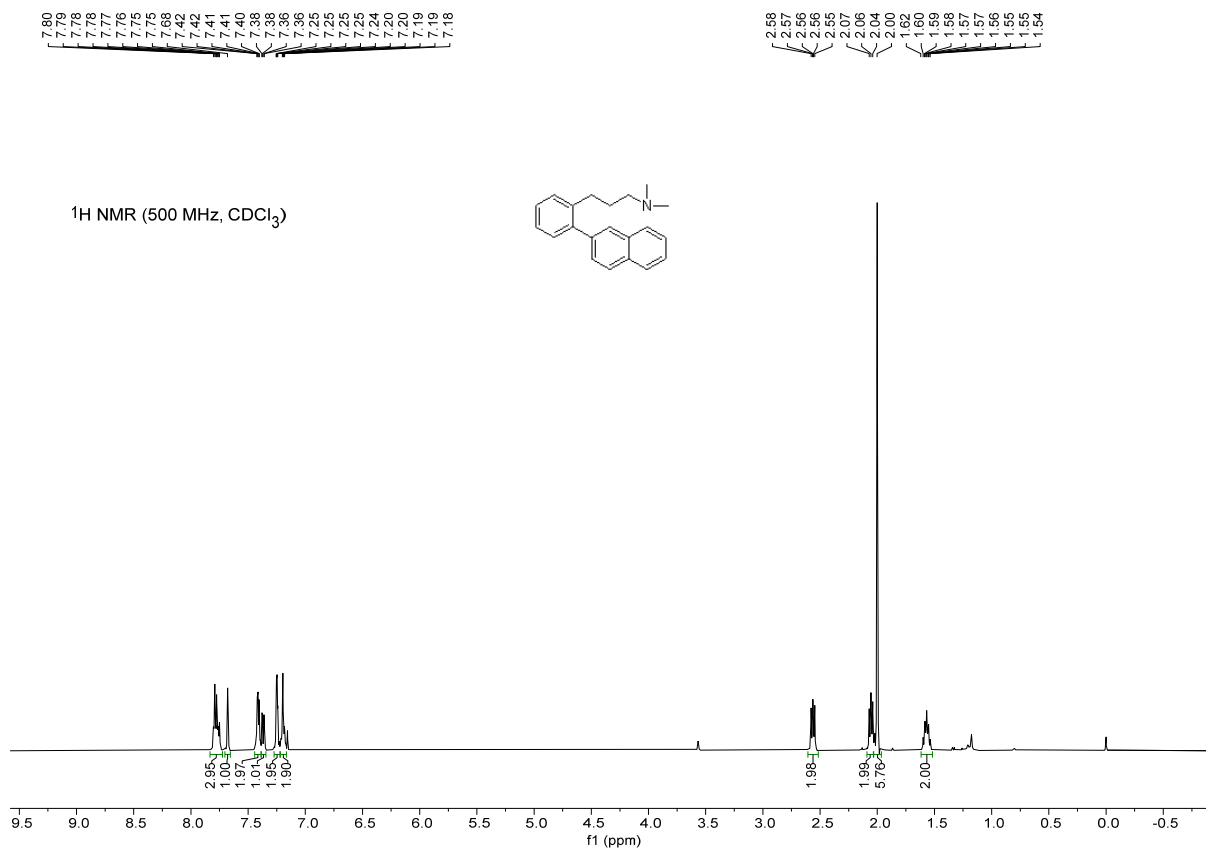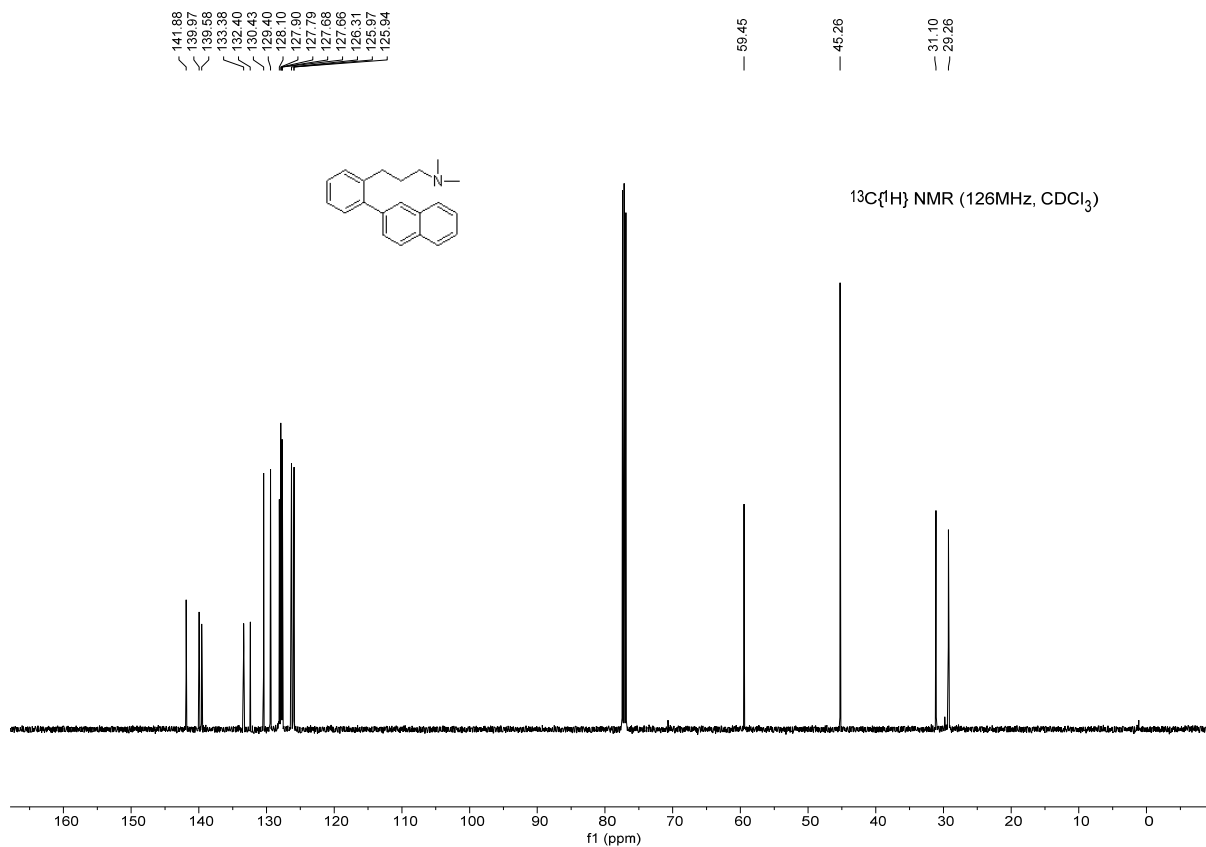



(20) 3-(2-(dimethyl(phenyl)silyl)phenyl)-N,N-dimethylpropan-1-amine (**6a**)

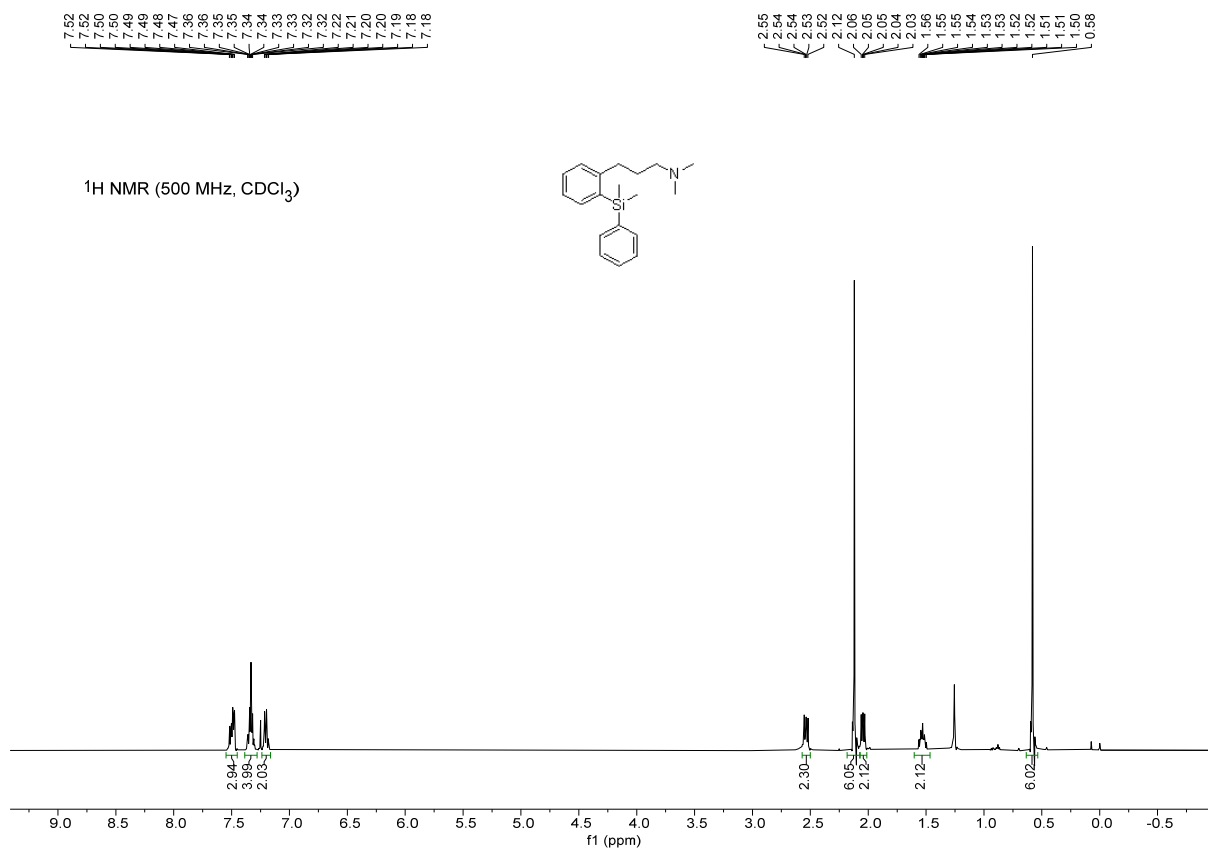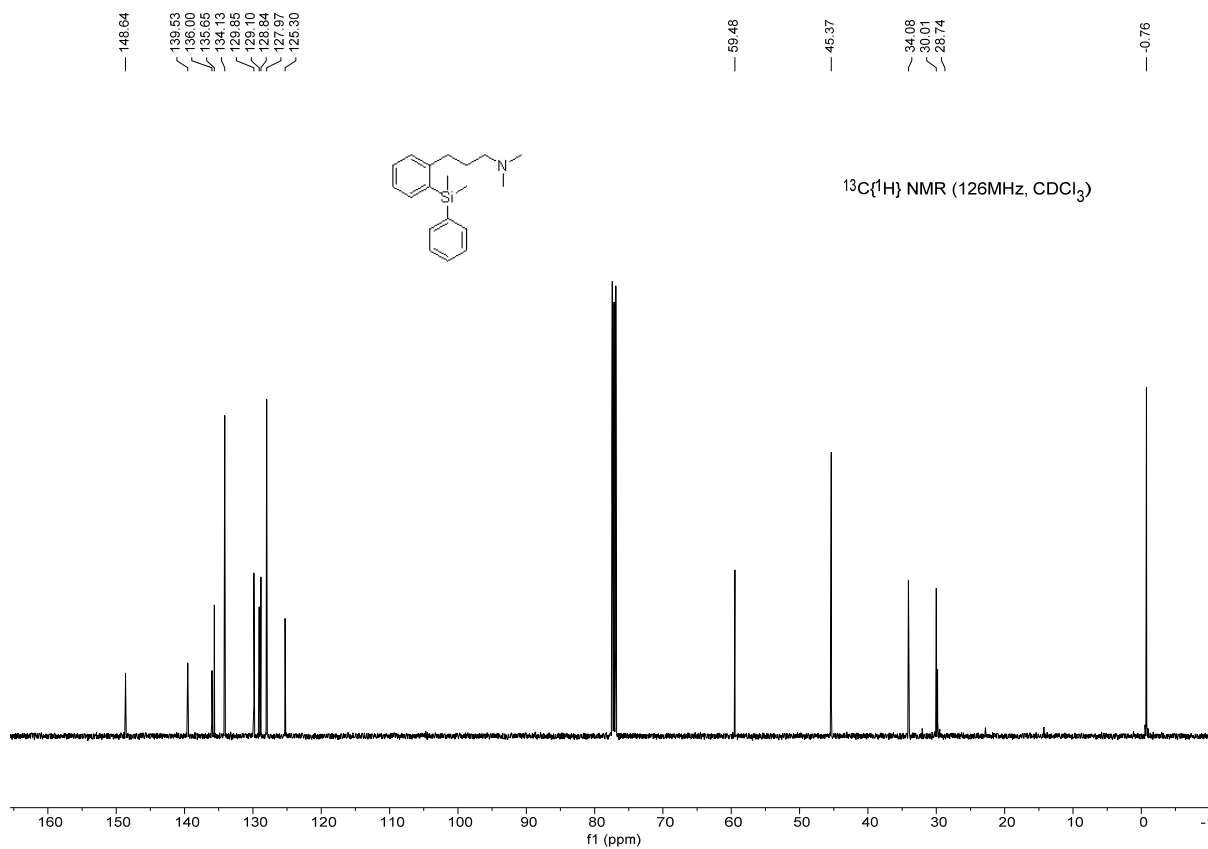

(21) 3-(2-(dimethyl(phenyl)silyl)-5-methylphenyl)-N,N-dimethylpropan-1-amine (**6b**)

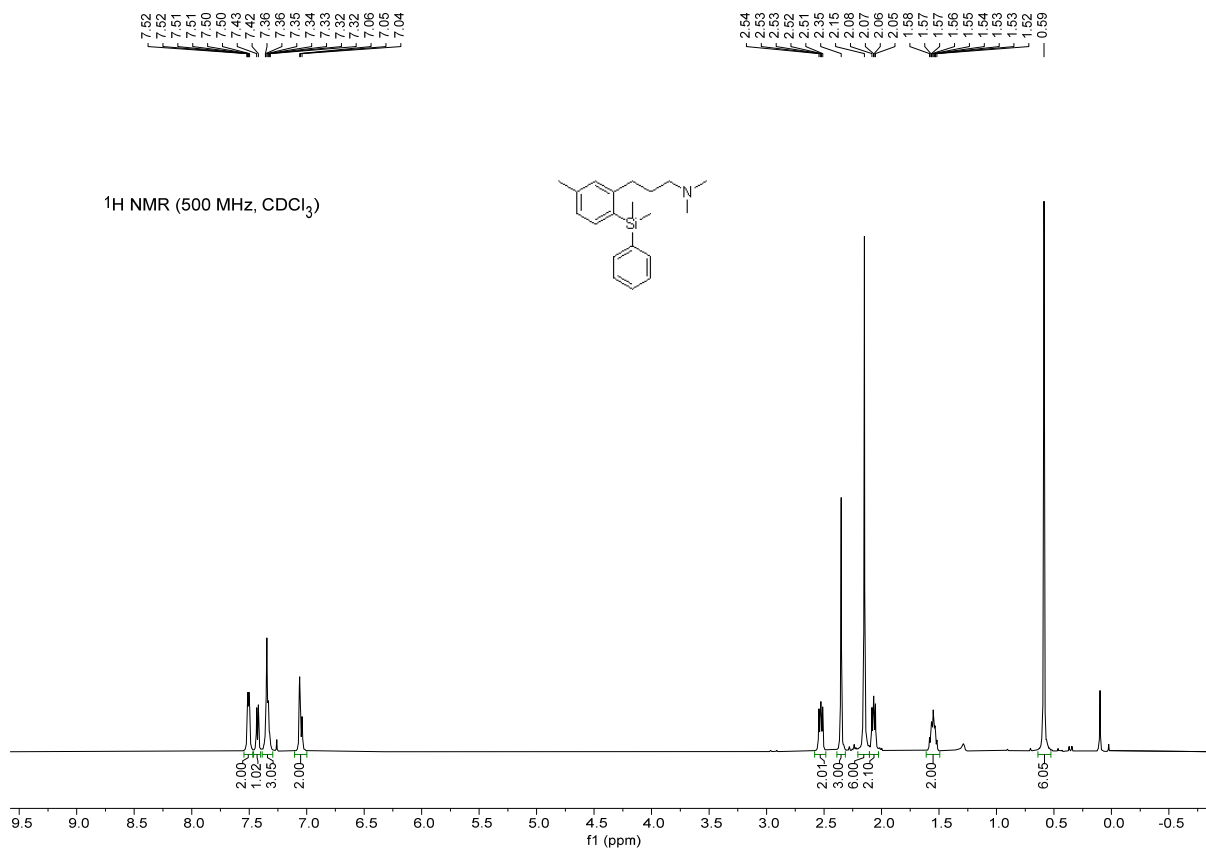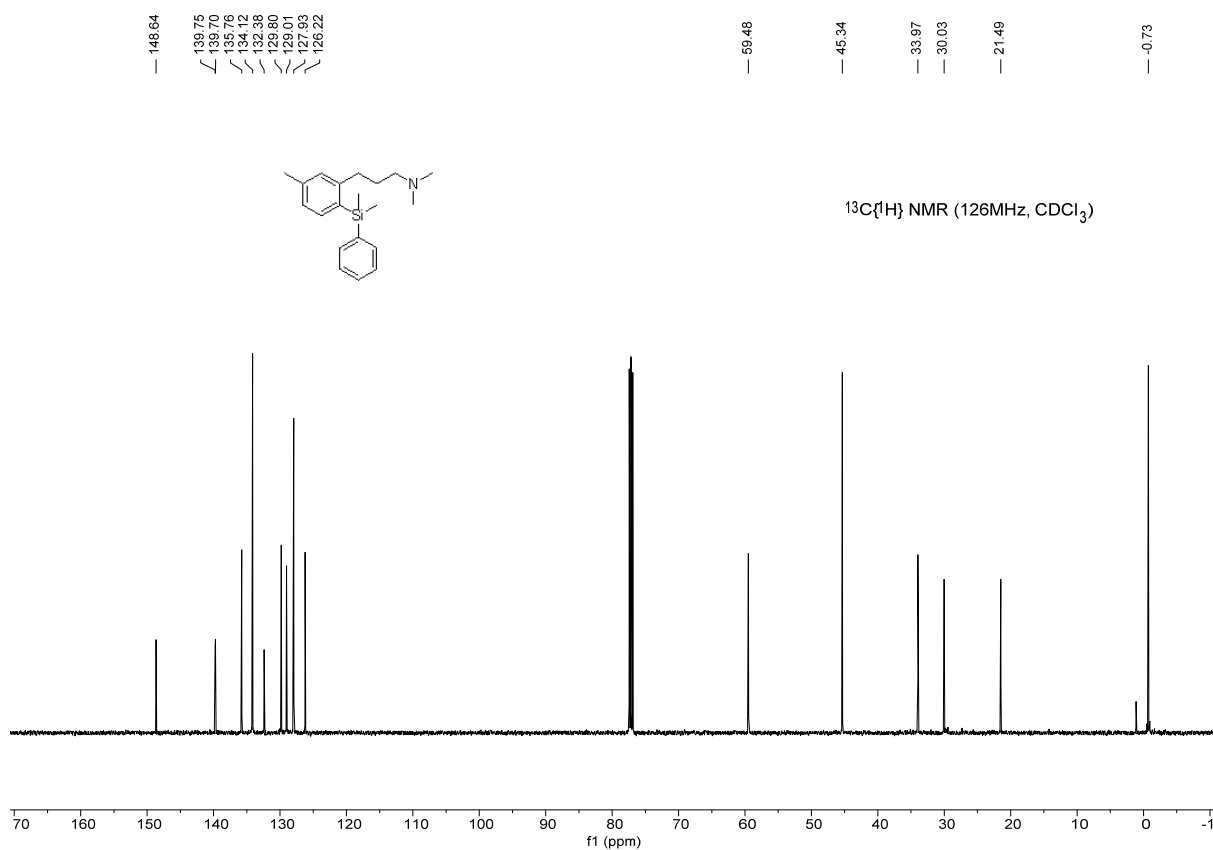

(22) 3-(2-(dimethyl(phenyl)silyl)-5-fluorophenyl)-N,N-dimethylpropan-1-amine (**6c**)

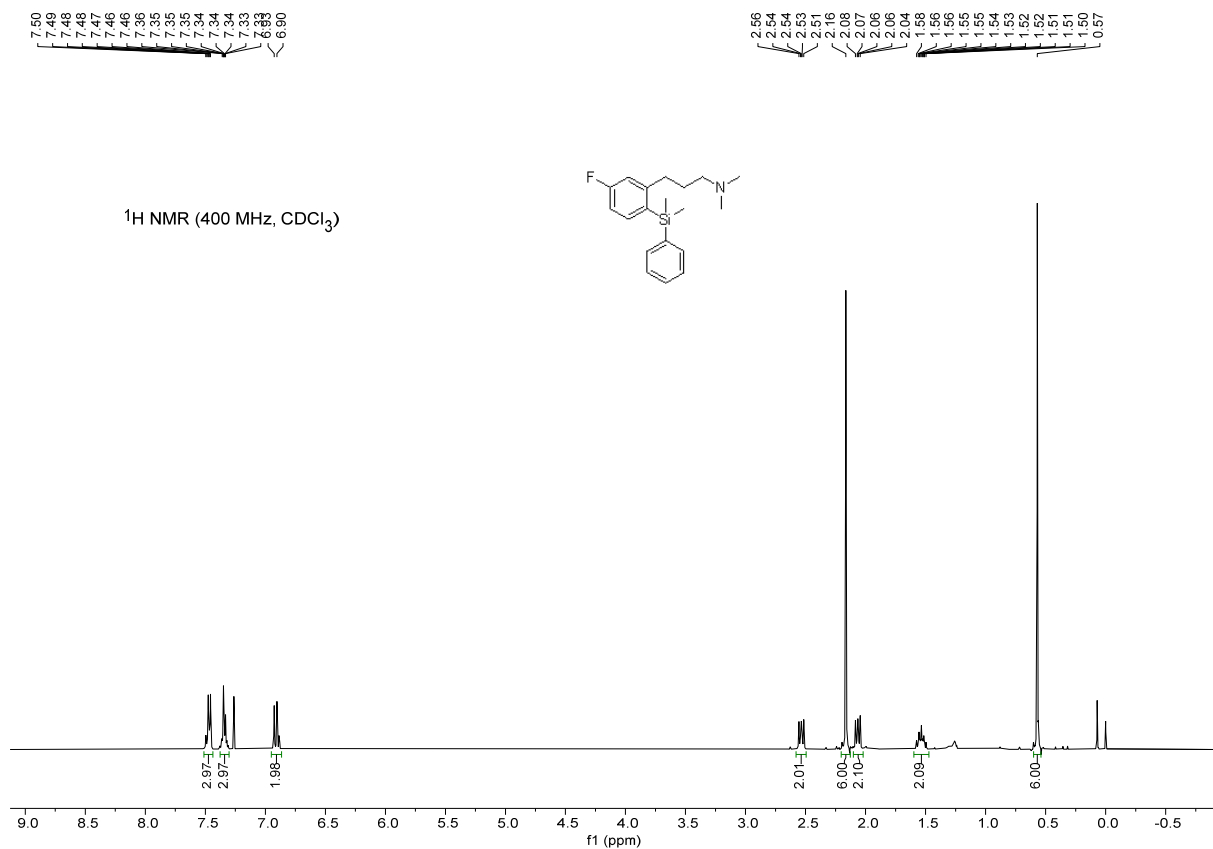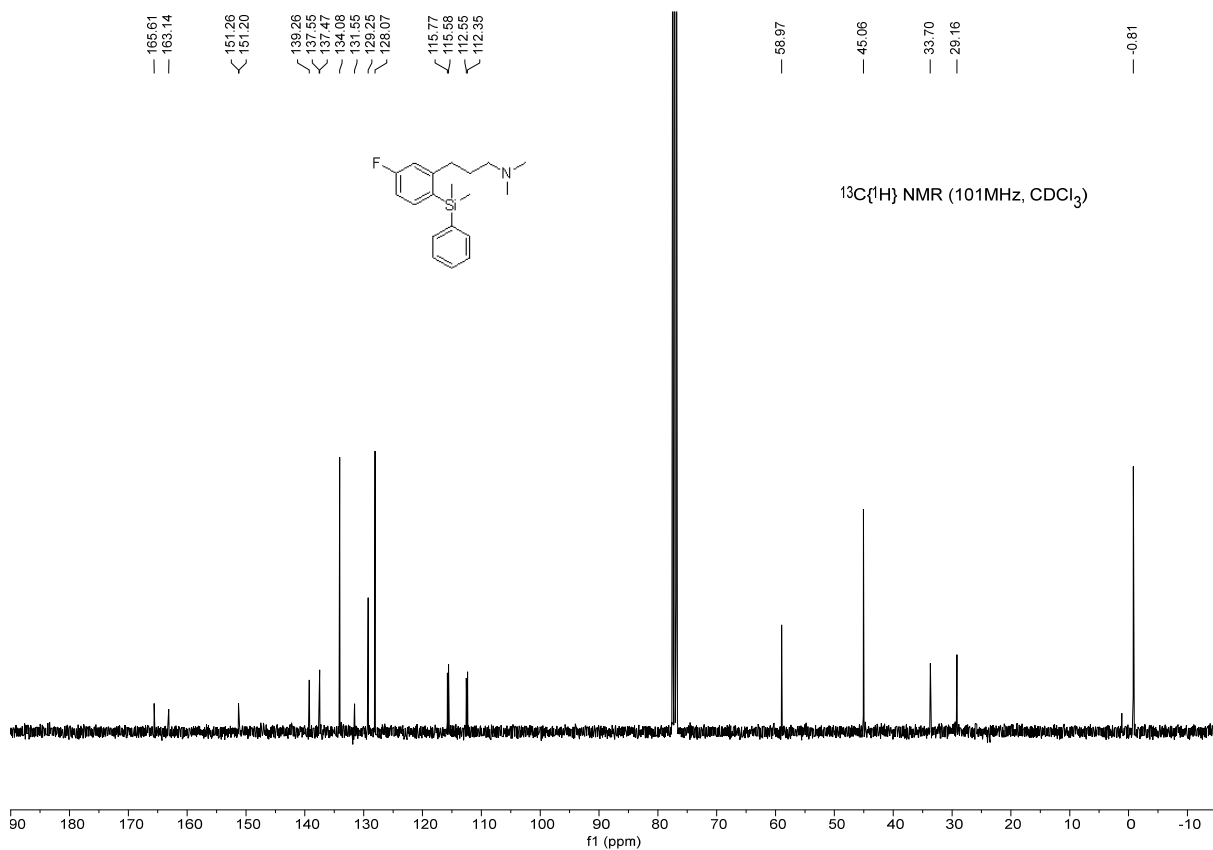

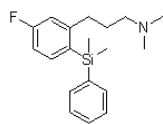

-111.09  
-112.01  
-112.04  
-112.06

<sup>19</sup>F NMR (376 MHz, CDCl<sub>3</sub>)

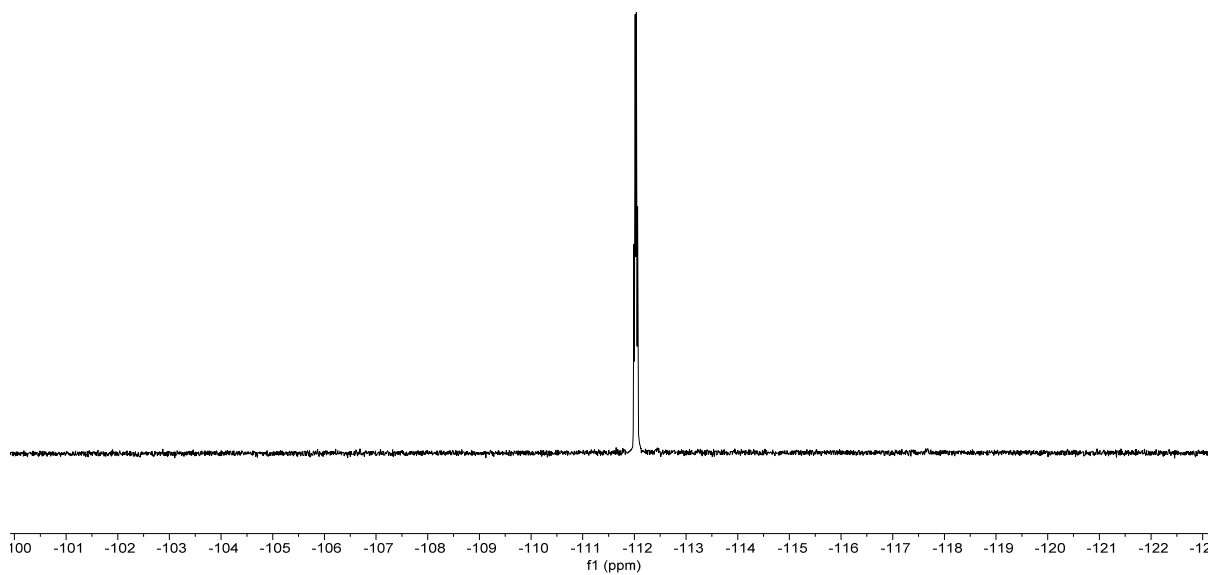

(23) 3-(5-chloro-2-(dimethyl(phenyl)silyl)phenyl)-N,N-dimethylpropan-1-amine (**6d**)

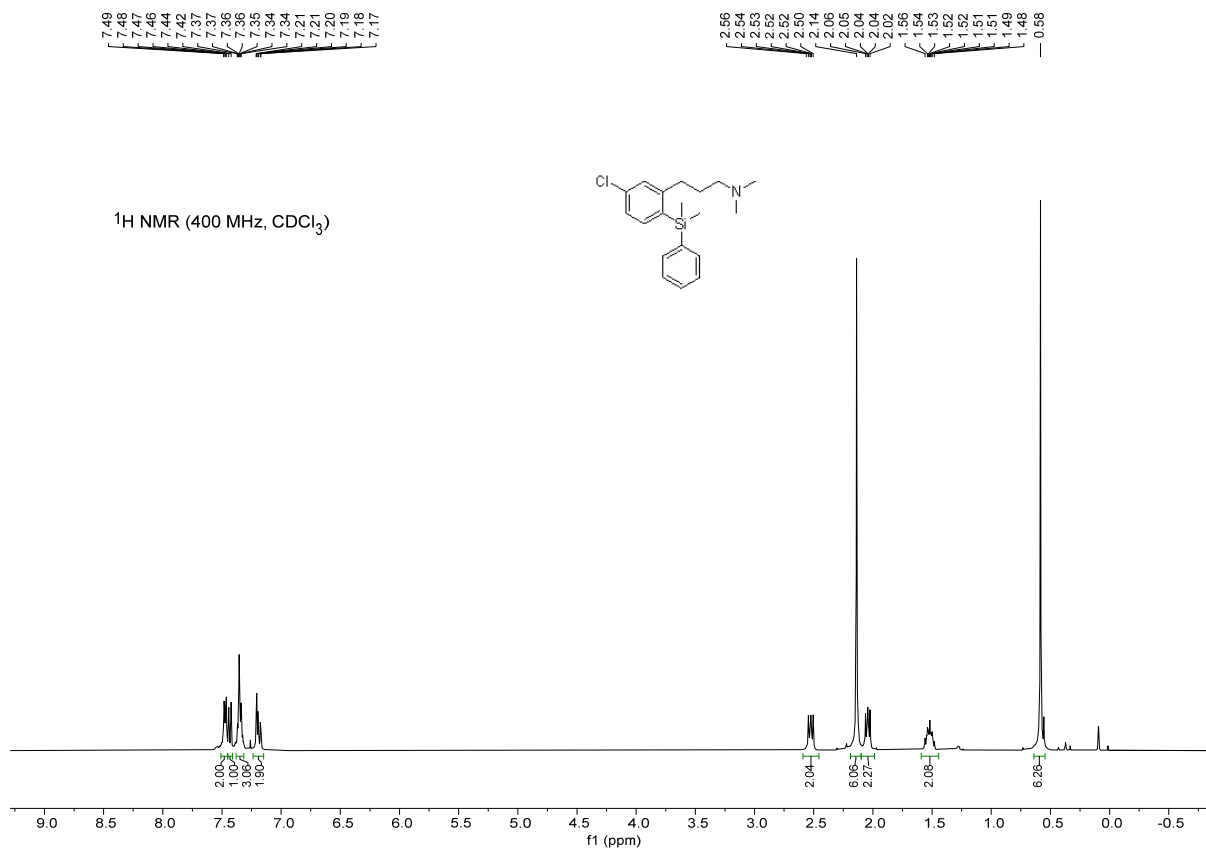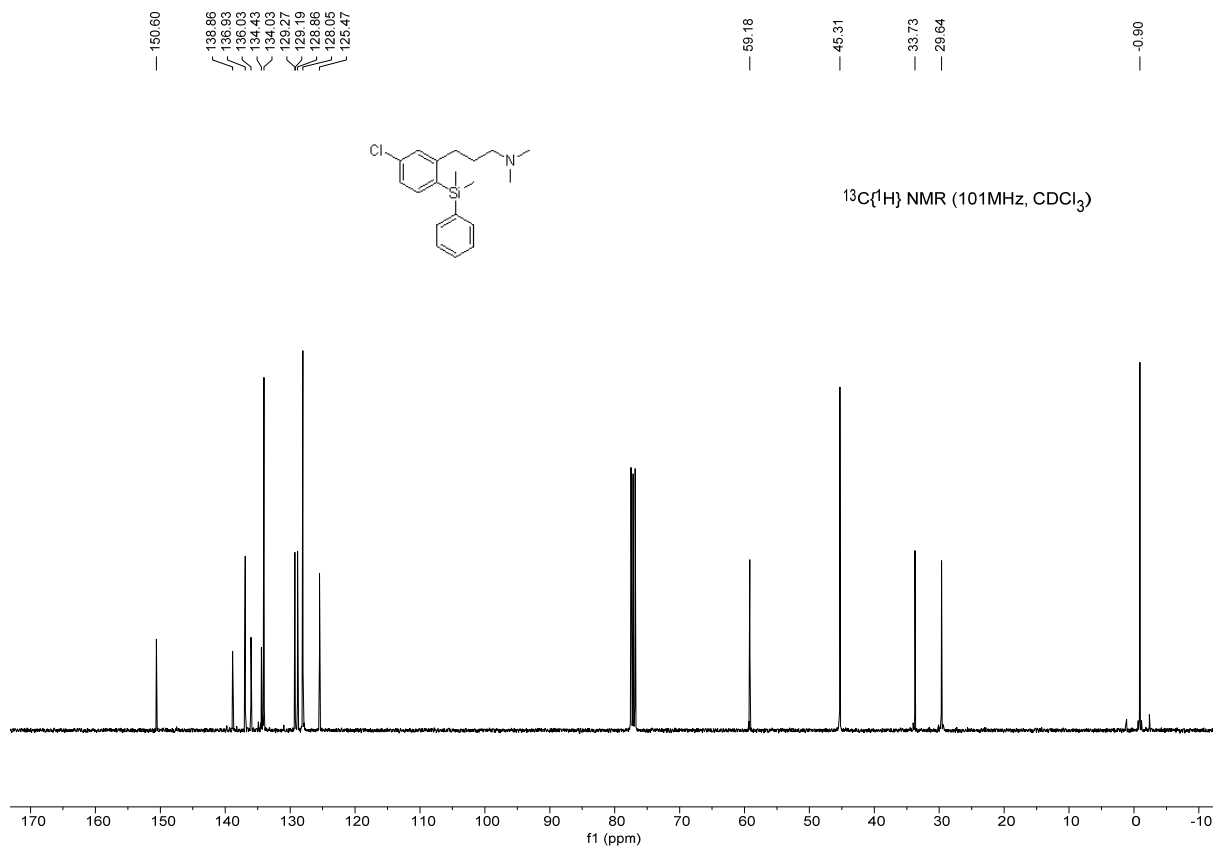

(24) methyl 4-(dimethyl(phenyl)silyl)-3-(3-(dimethylamino)propyl)benzoate (**6e**)

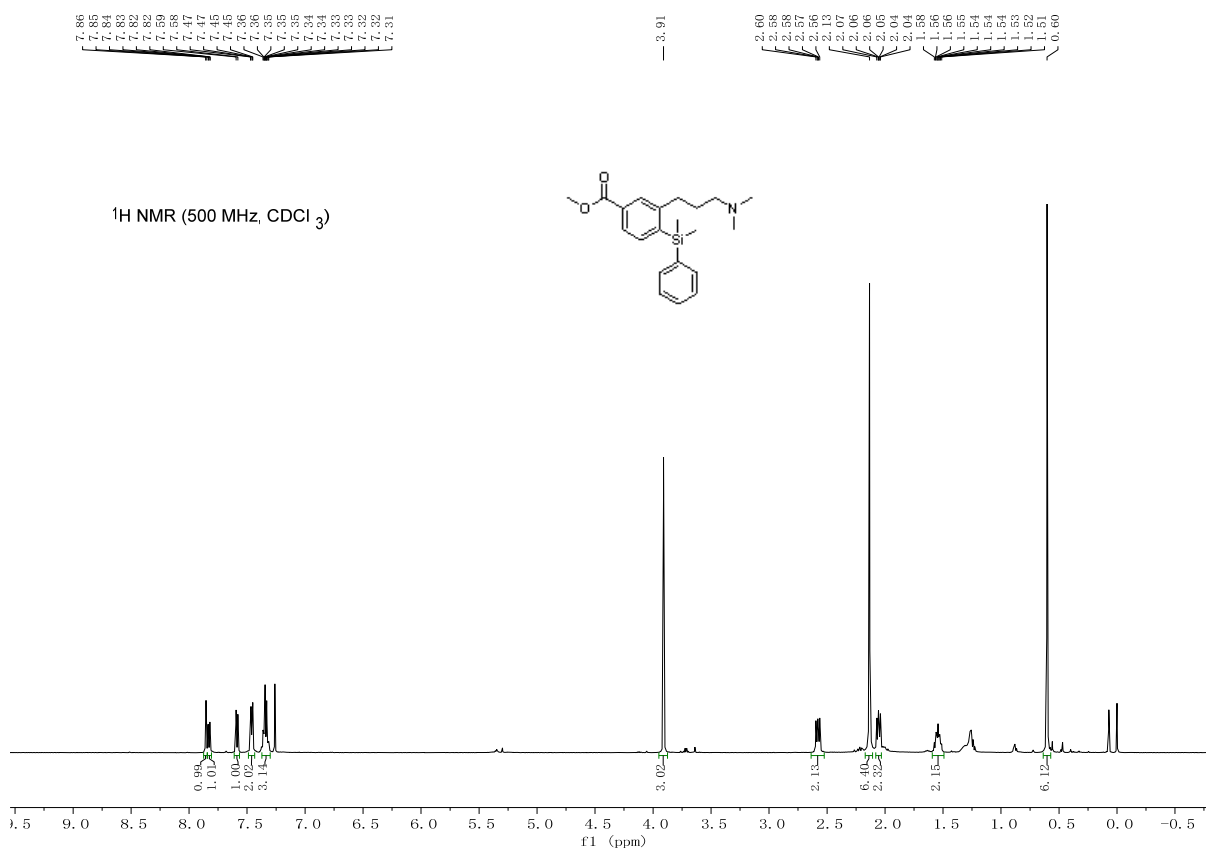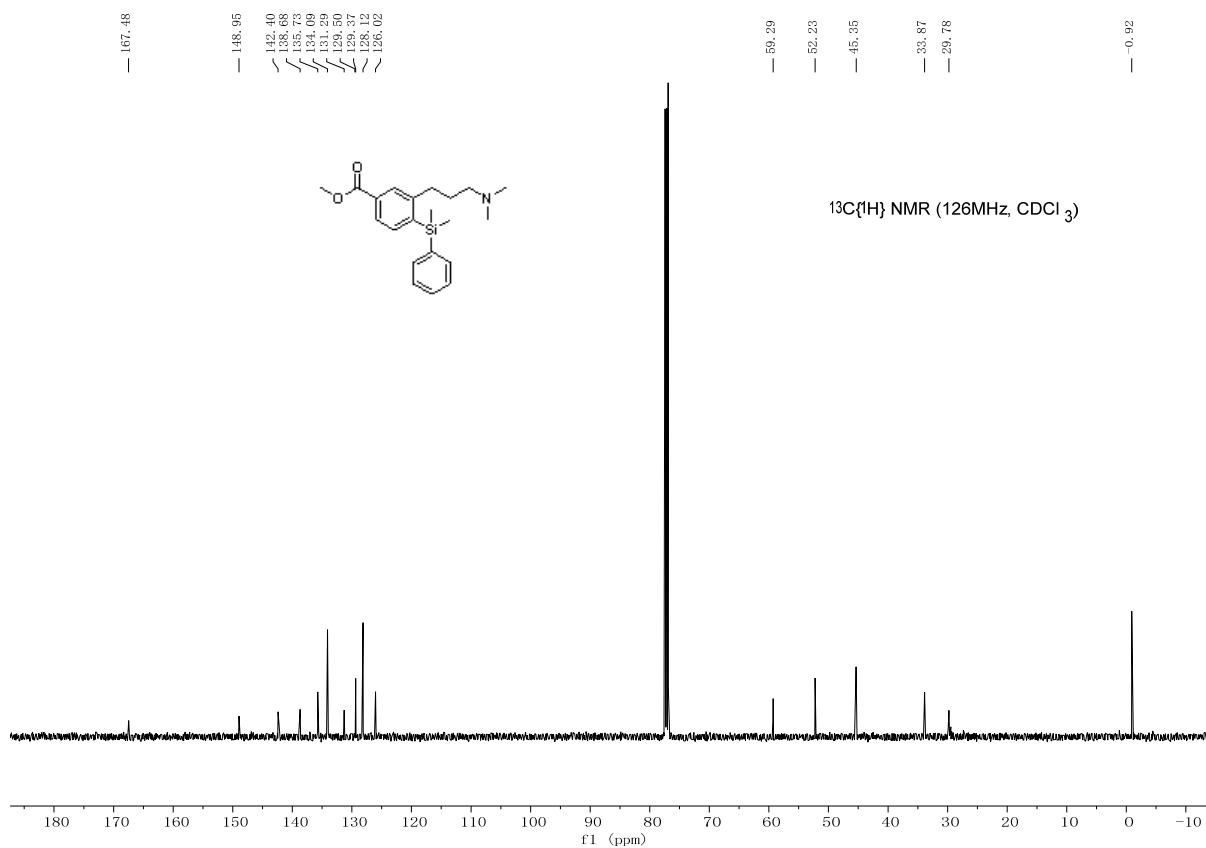

(25) 3-(2-(dimethyl(phenyl)silyl)-6-methylphenyl)-N,N-dimethylpropan-1-amine (**6f**)

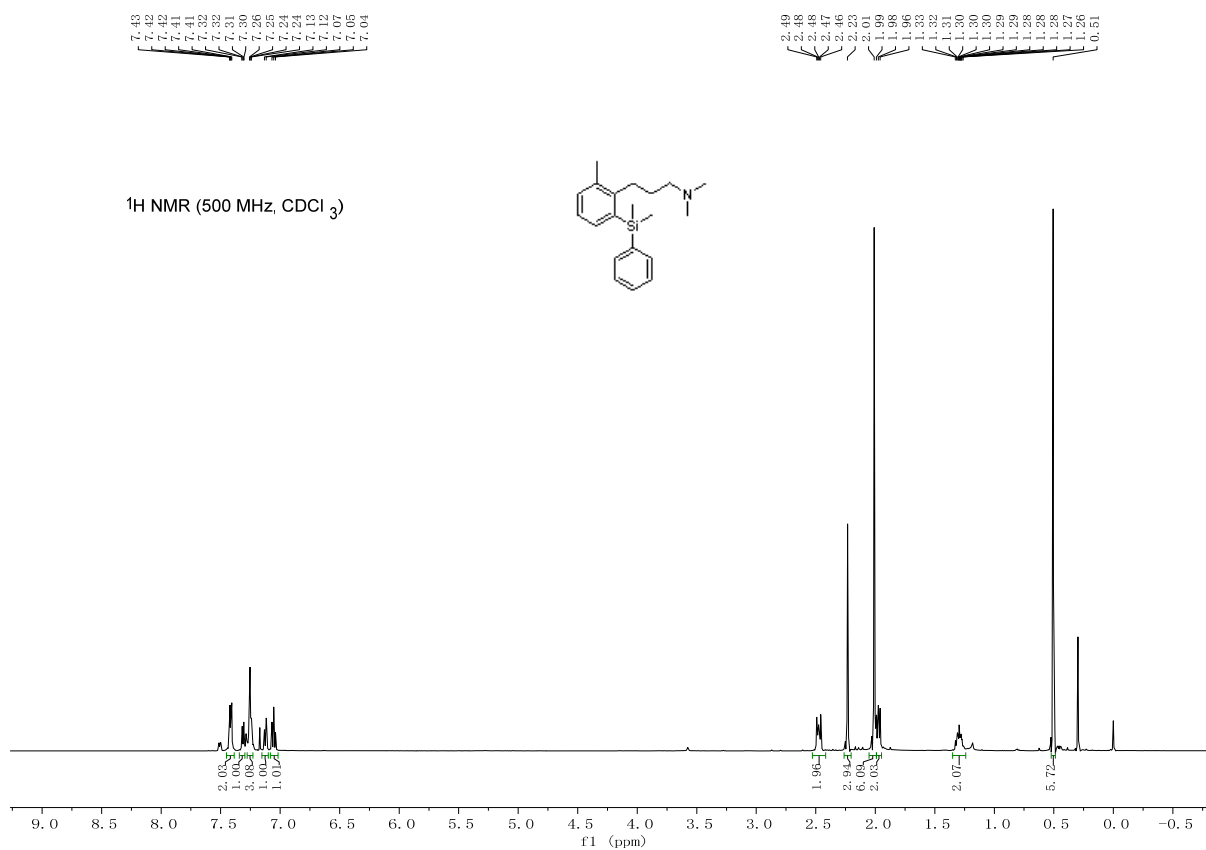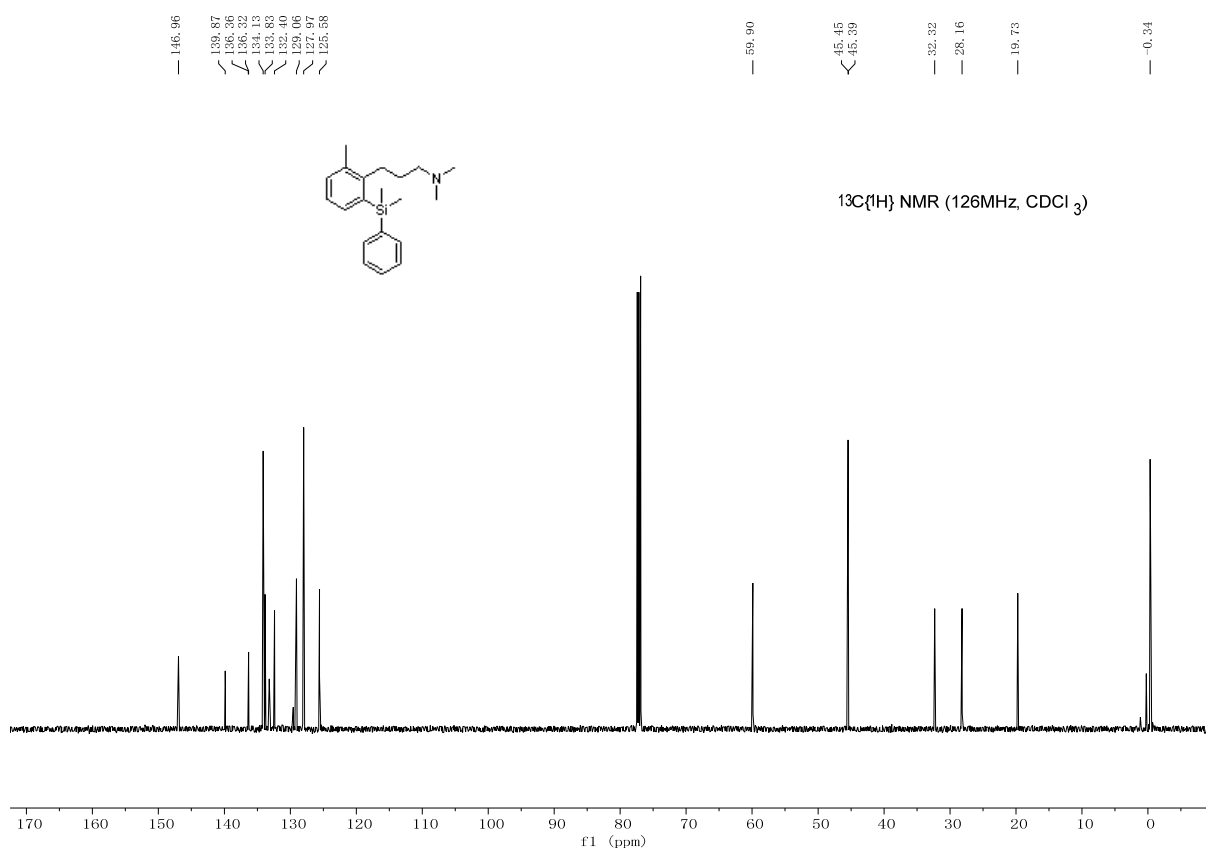

(26) 3-(2-(dimethyl(phenyl)silyl)-4-methylphenyl)-N,N-dimethylpropan-1-amine (6g)

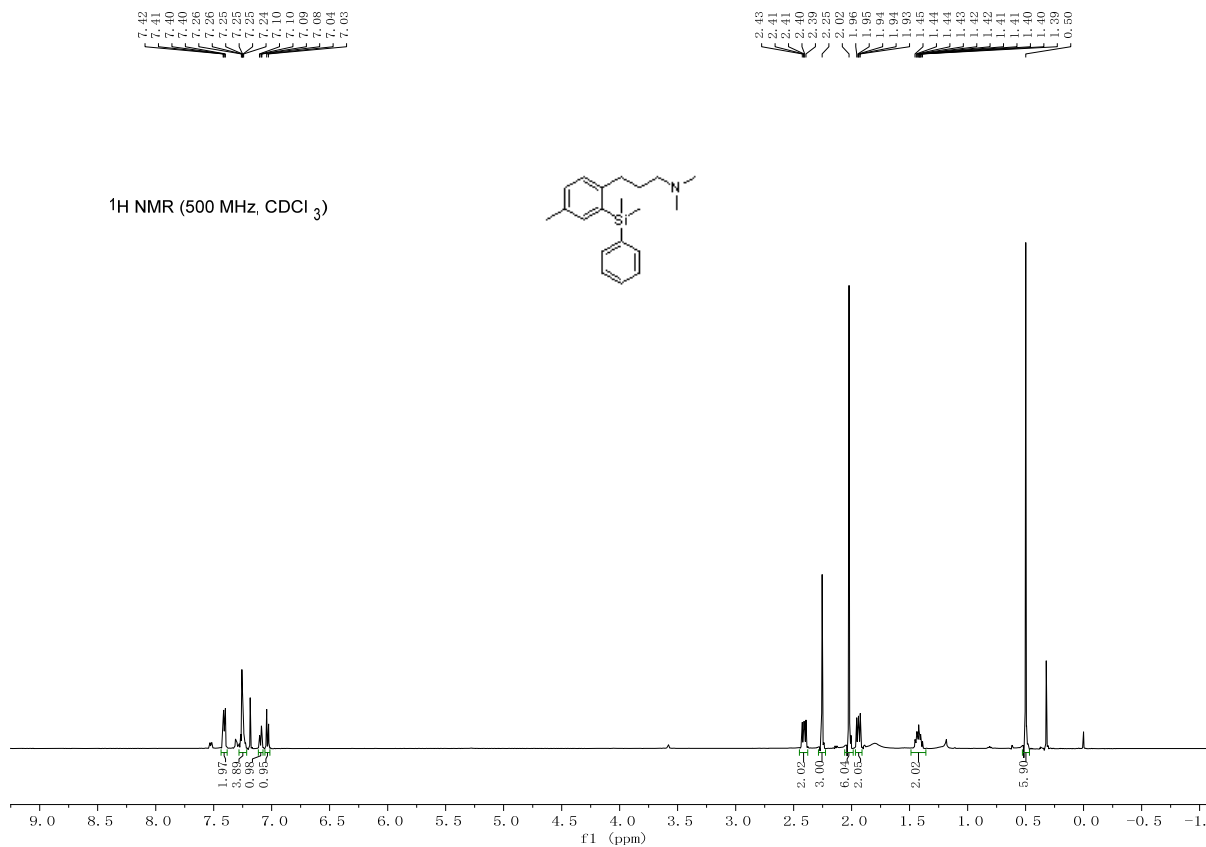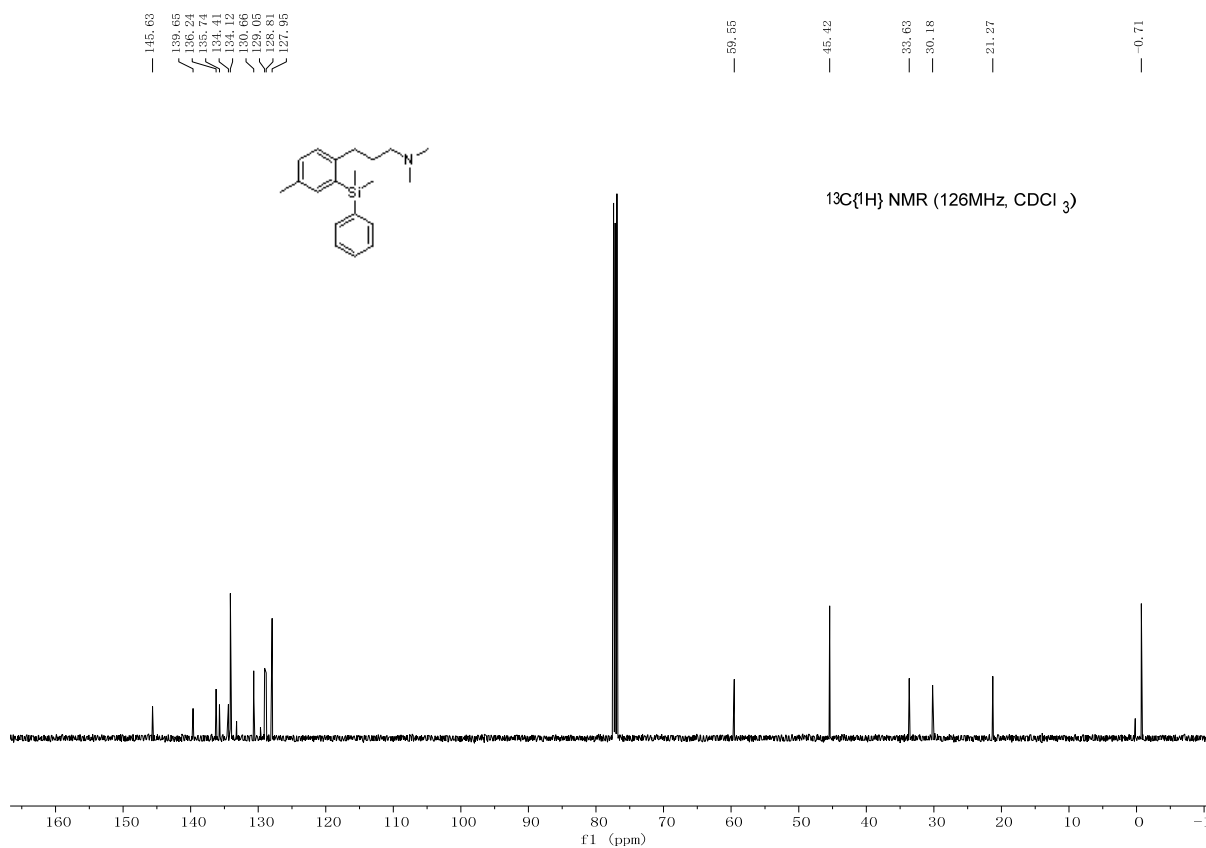



(27) 3-(4-chloro-2-(dimethyl(phenyl)silyl)phenyl)-N,N-dimethylpropan-1-amine (**6h**)

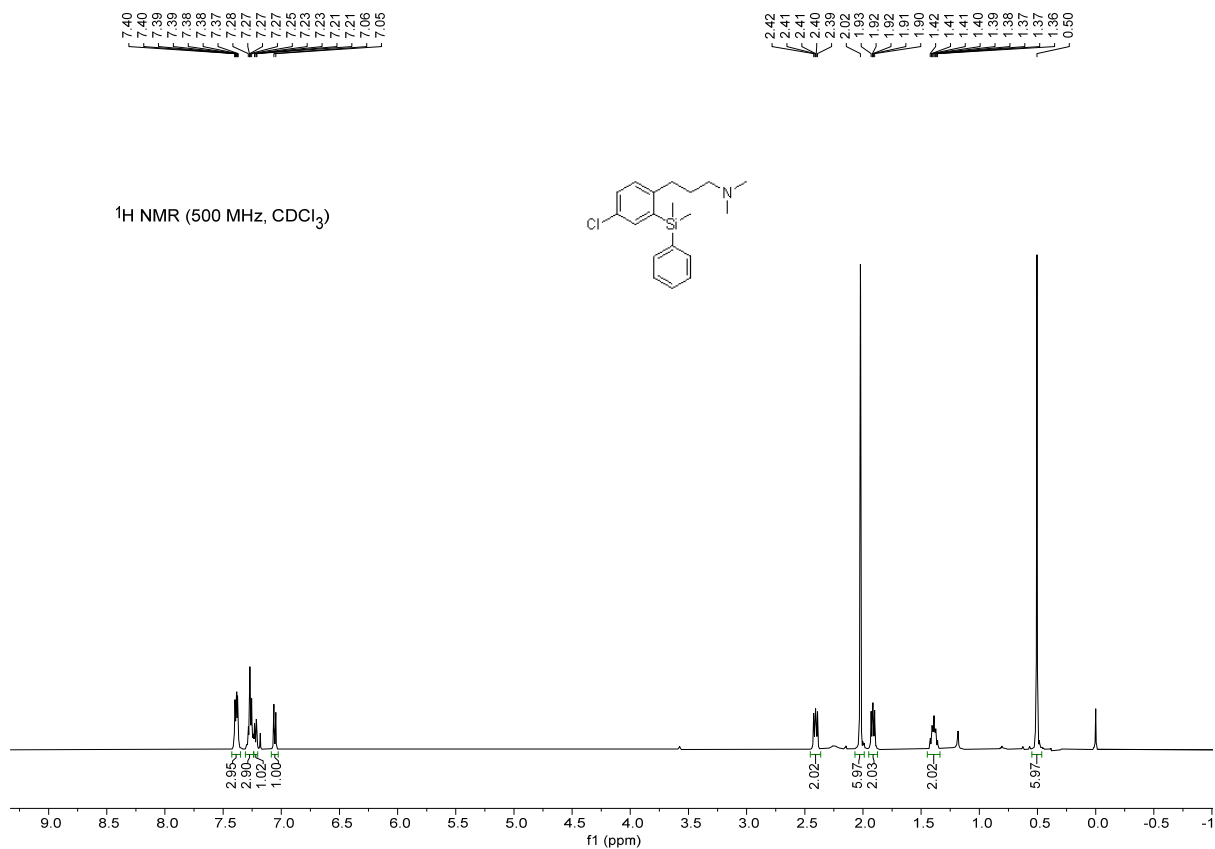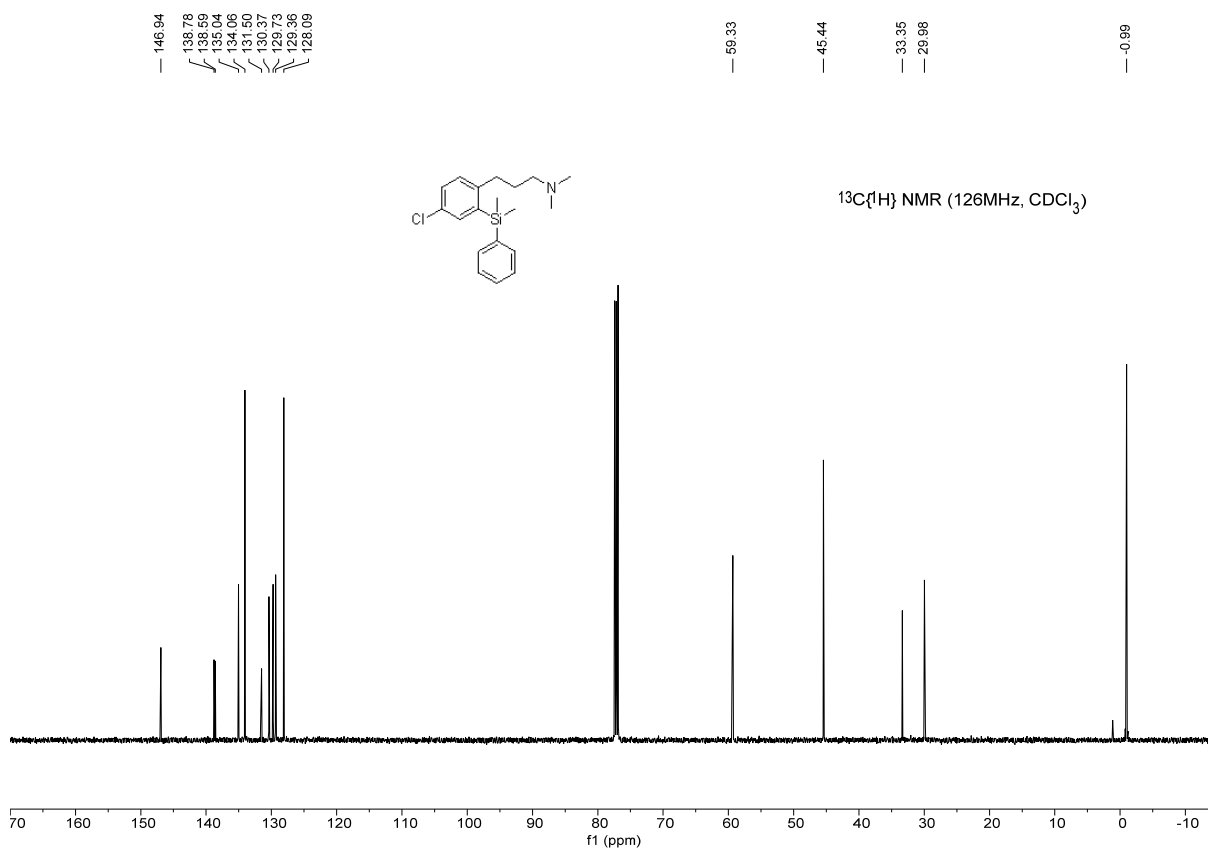

(28) 4-(2-(dimethyl(phenyl)silyl)phenyl)-N,N-dimethylbutan-2-amine (6i)

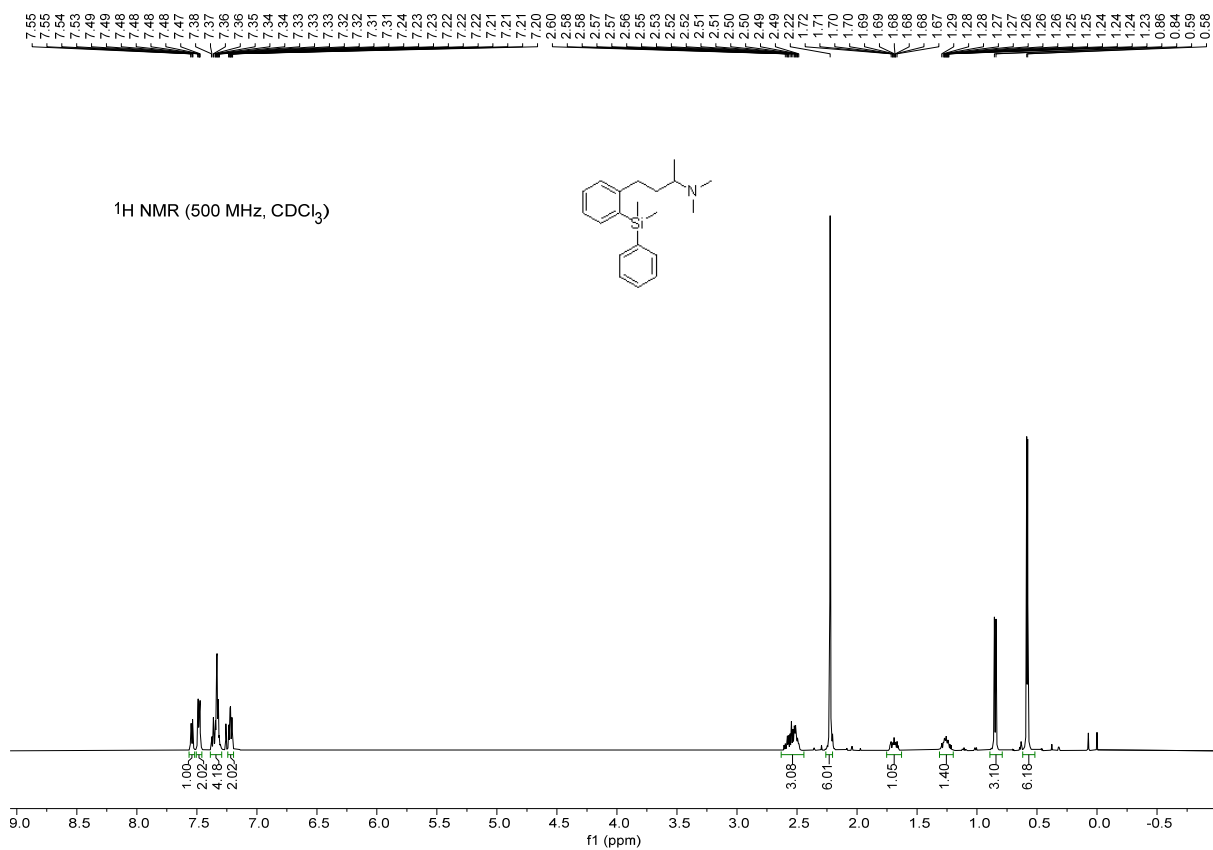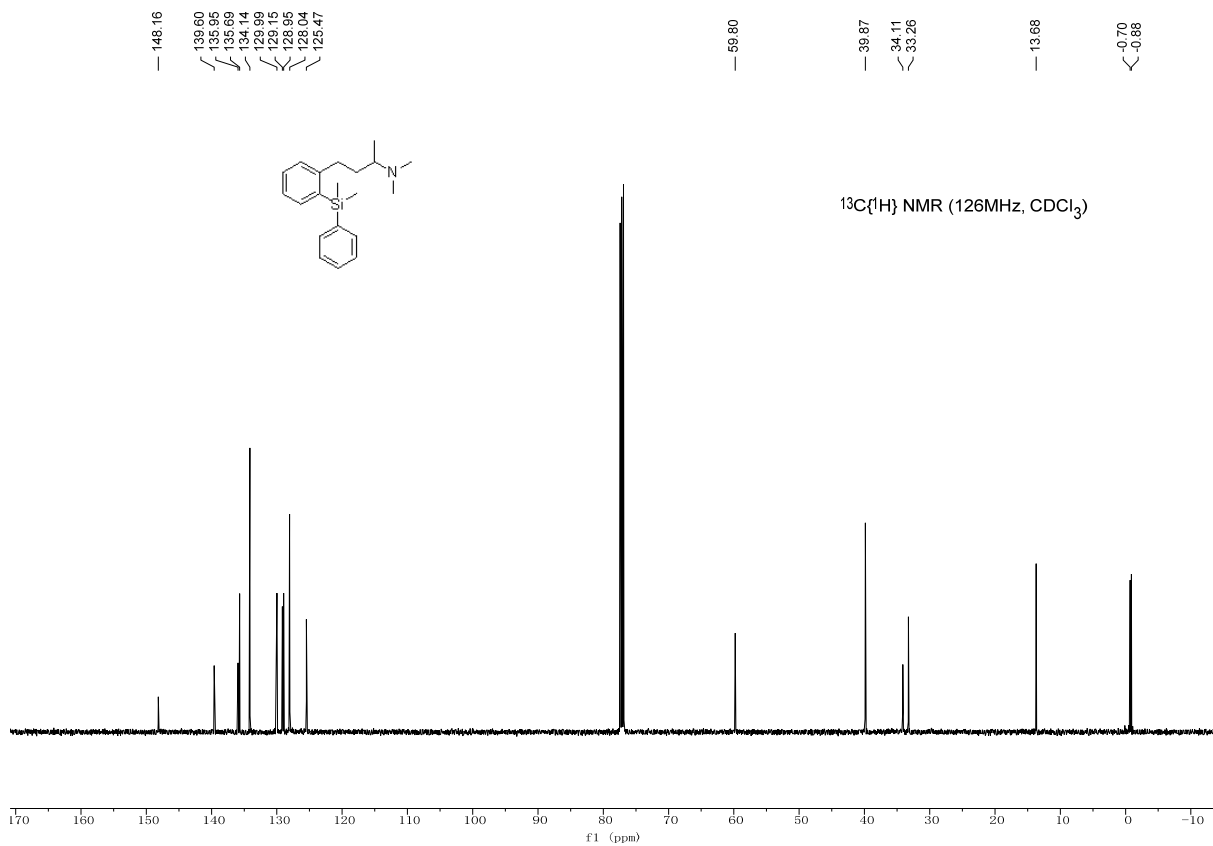

(29) 3-(2-(dimethyl(phenyl)silyl)phenyl)-N,N,2-trimethylpropan-1-amine (6j)

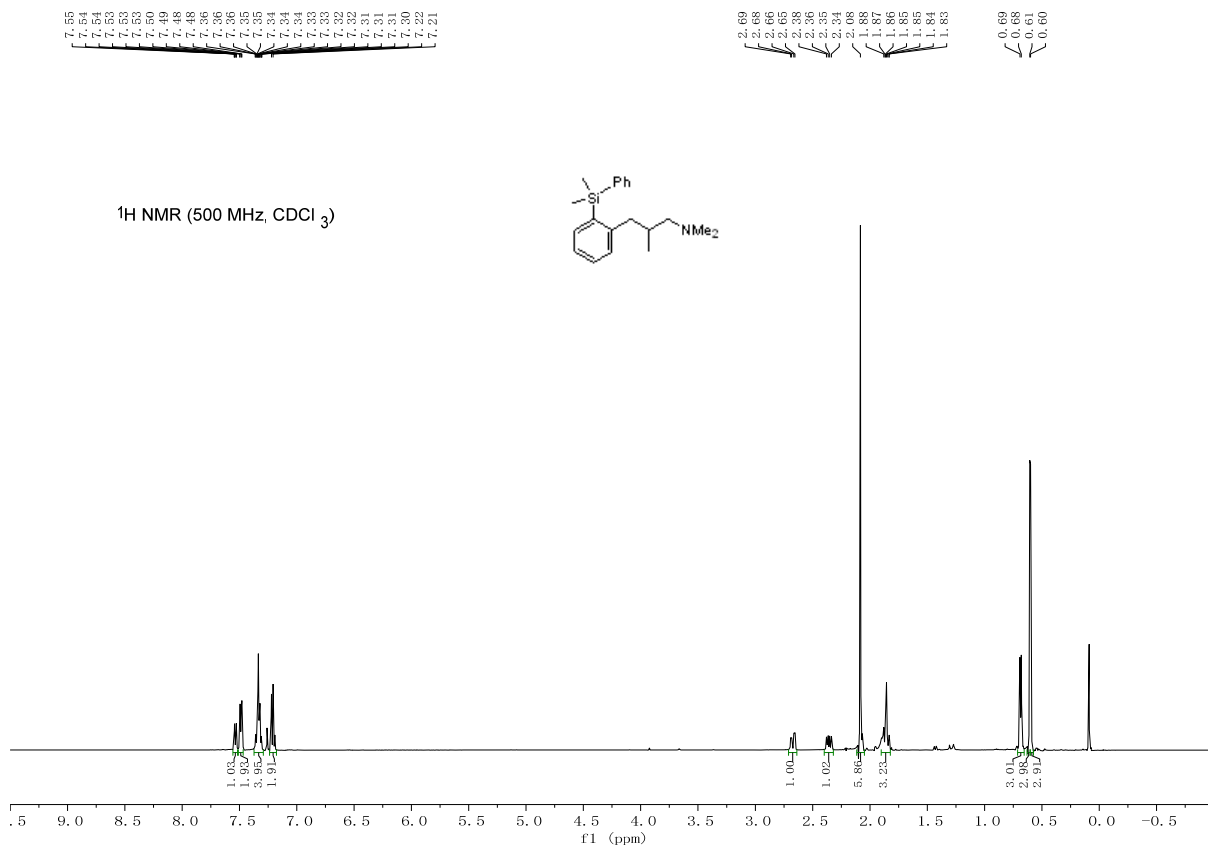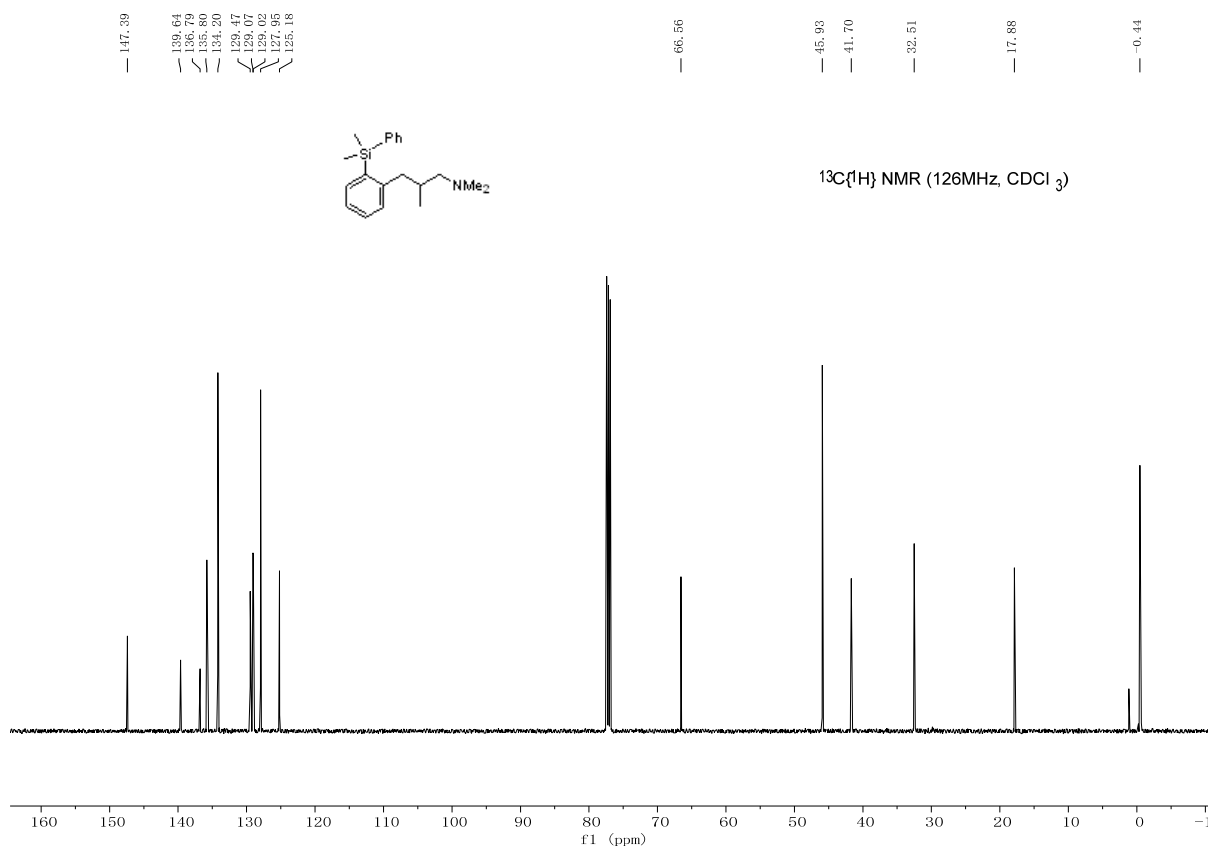

(30) 3-(2-(dimethyl(phenyl)silyl)phenyl)-N,N-dimethylbutan-1-amine (**6k**)

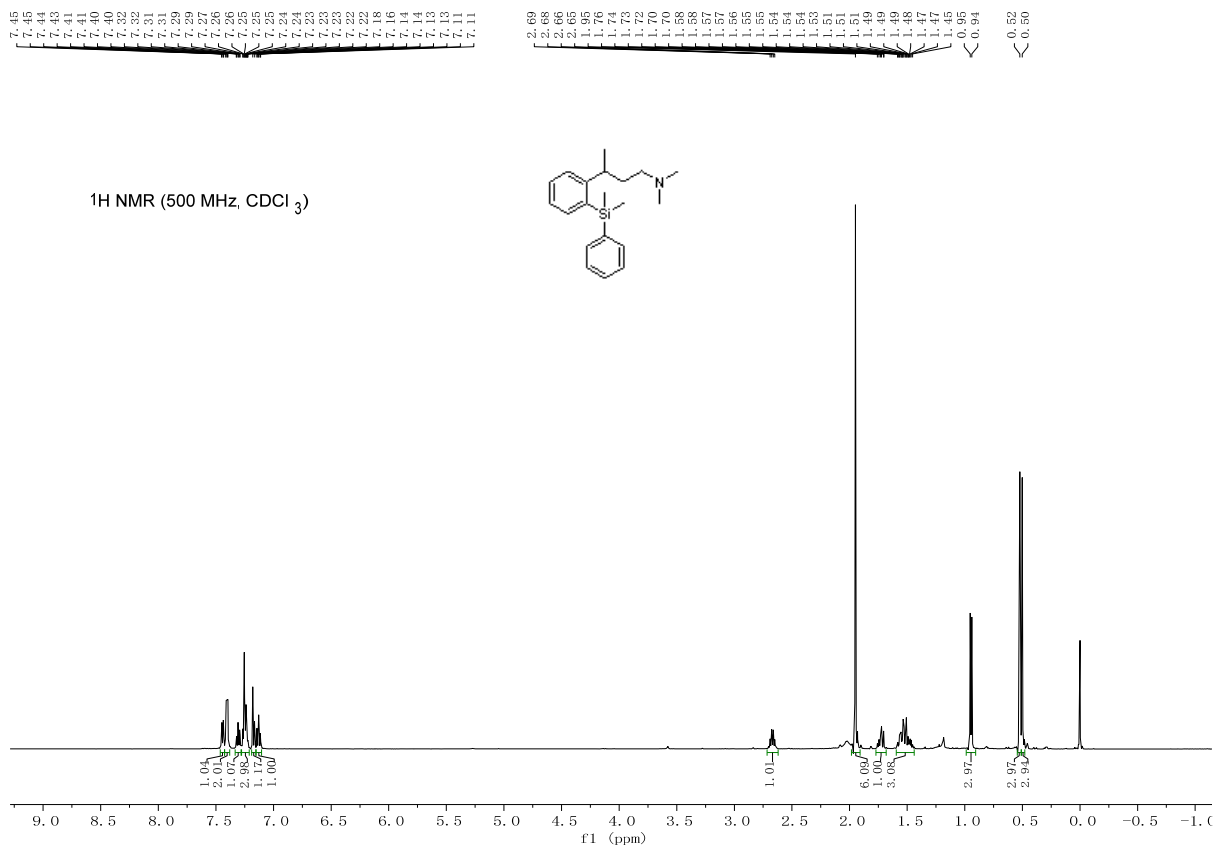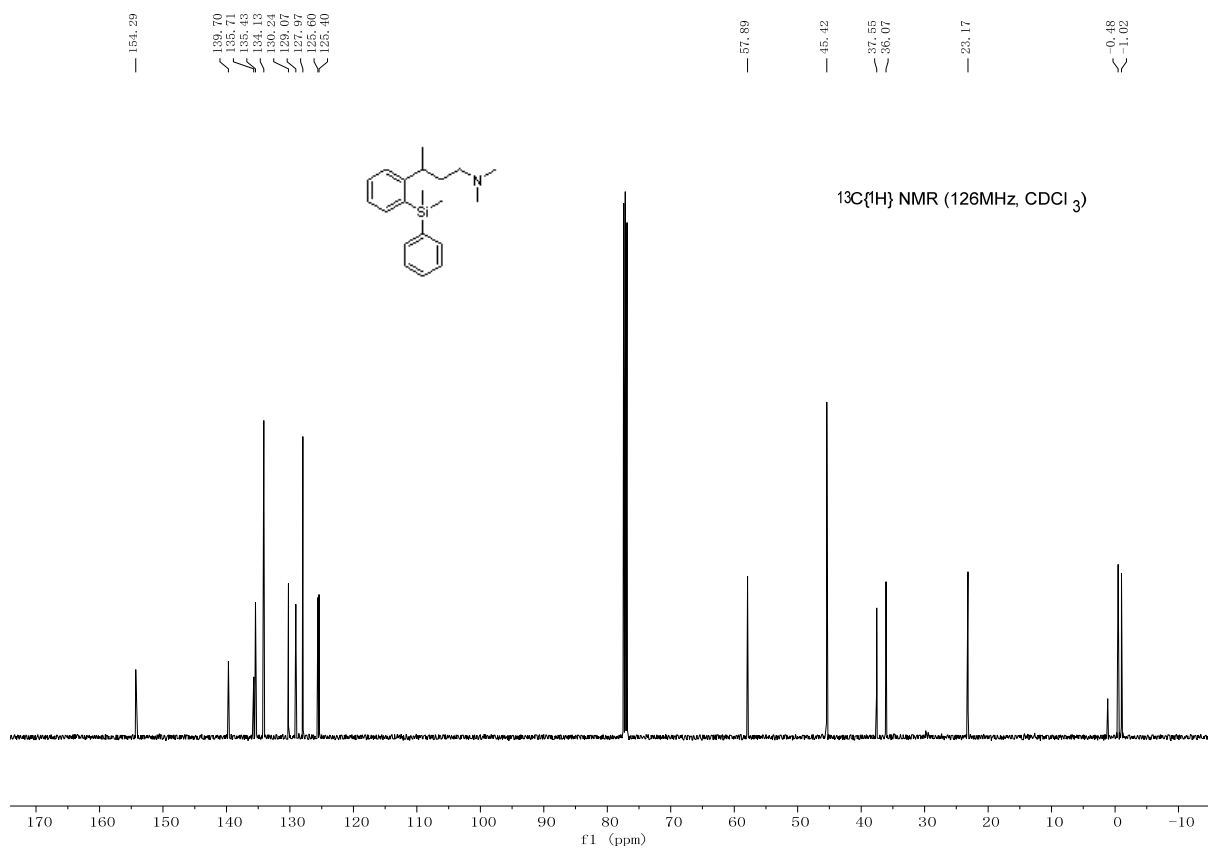

(31) 4-(2-(dimethyl(phenyl)silyl)phenyl)-N,N-dimethylbutan-1-amine (61)

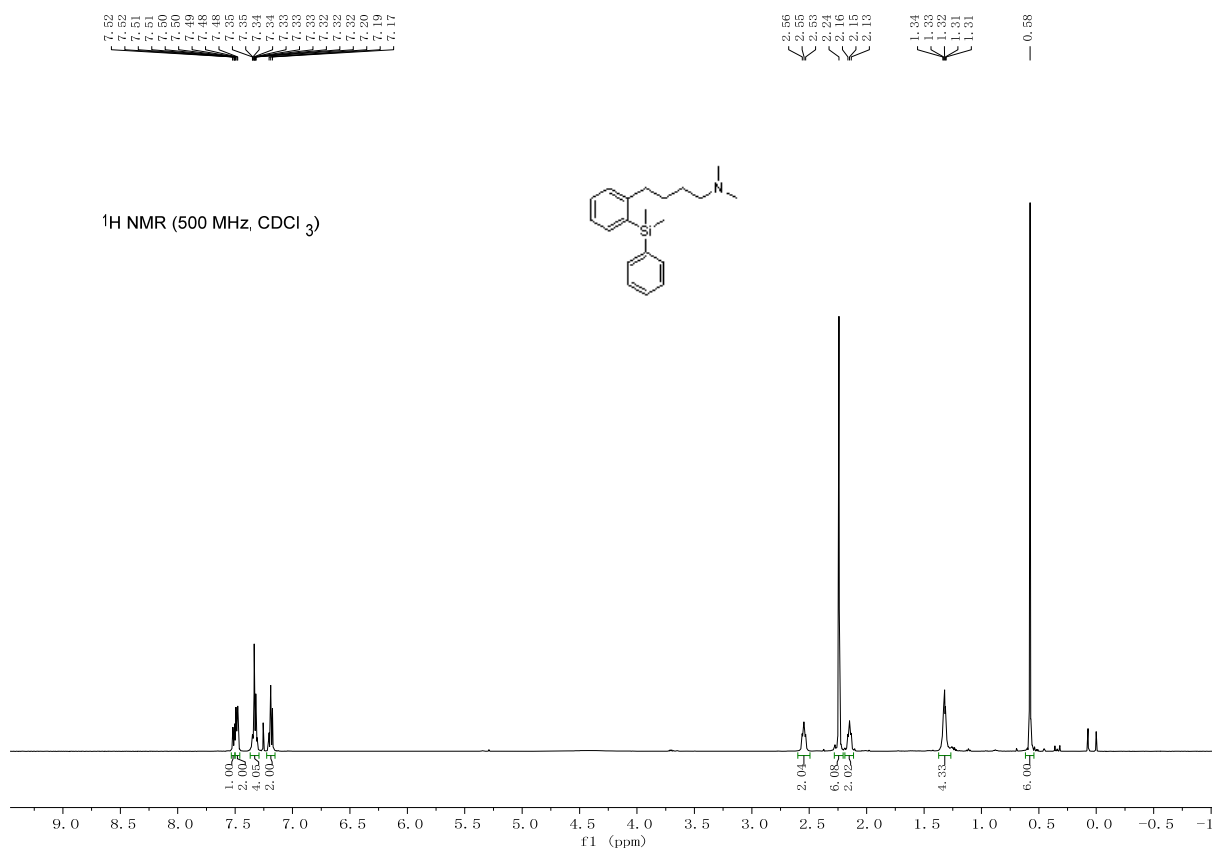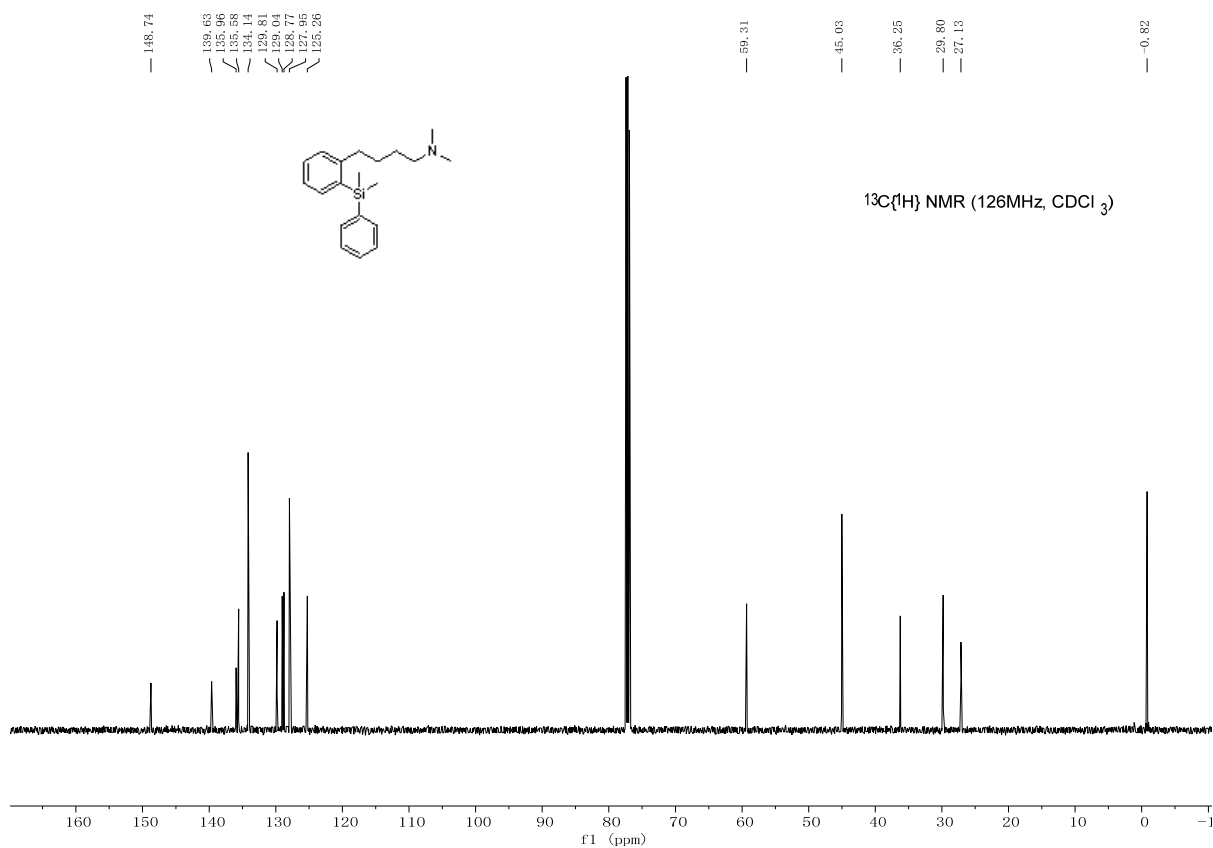

(32) 2-([1,1'-biphenyl]-2-yl)-N,N,N-trimethylethan-1-aminium iodide

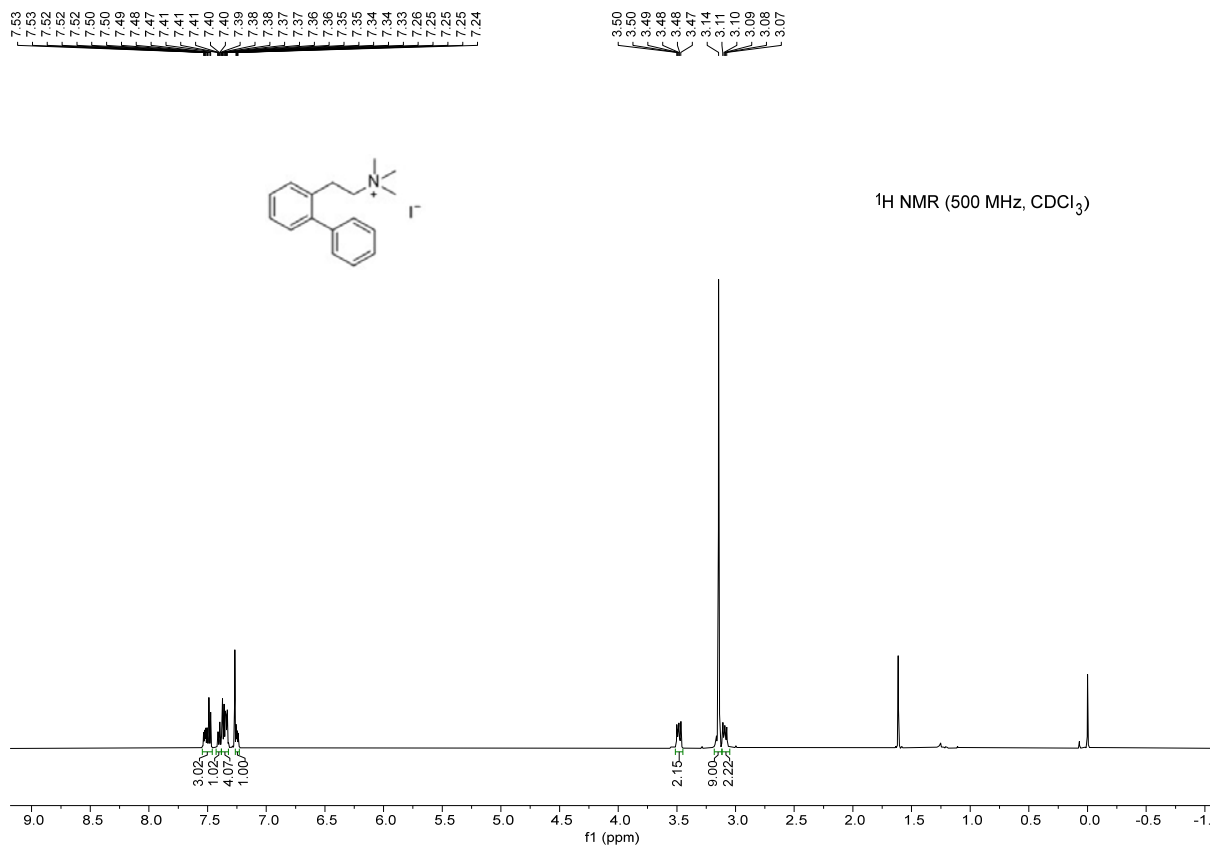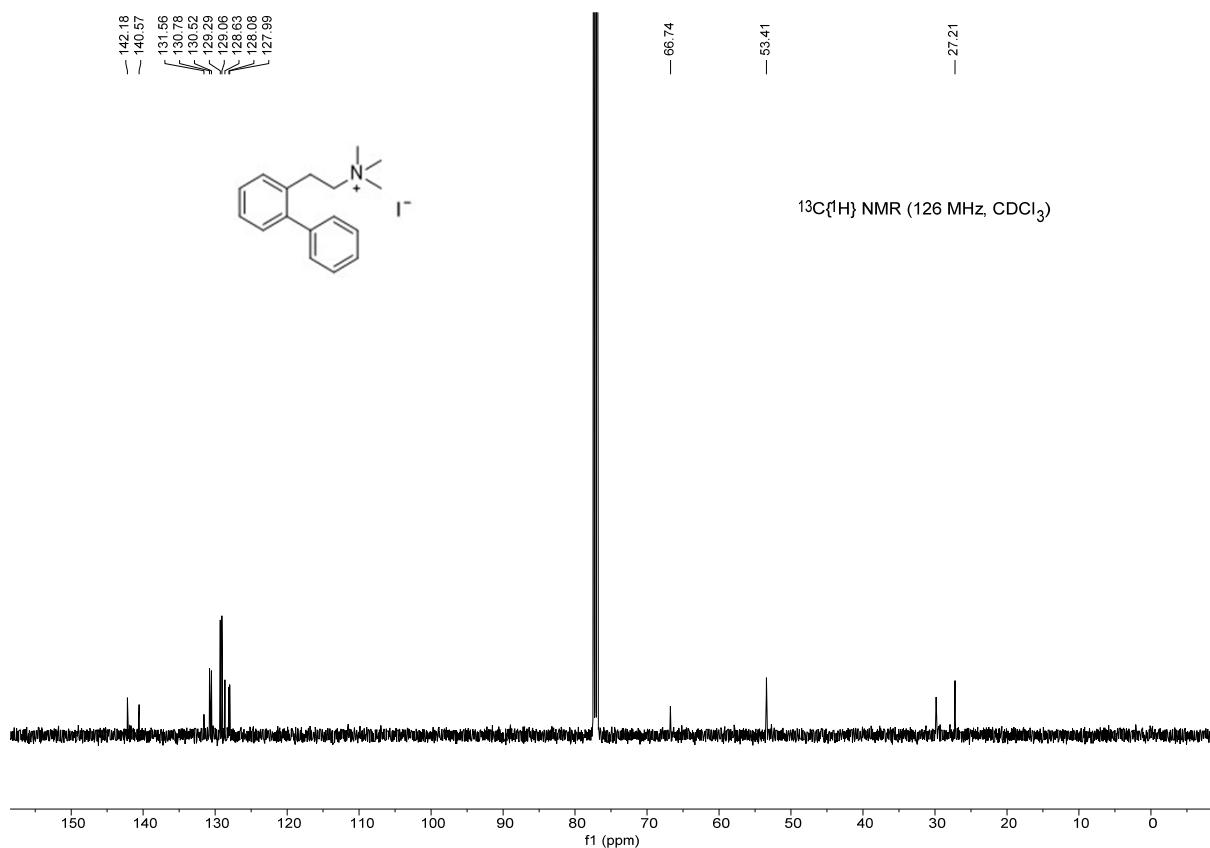

(33) 2-vinyl-1,1'-biphenyl

7.67  
7.66  
7.63  
7.54  
7.42  
7.41  
7.38  
7.37  
7.36  
7.35  
7.34  
7.34  
7.32  
7.31  
7.31  
6.79  
6.73  
6.72  
6.70

5.73  
5.70  
5.21  
5.19

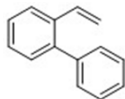

<sup>1</sup>H NMR (500 MHz, CDCl<sub>3</sub>)

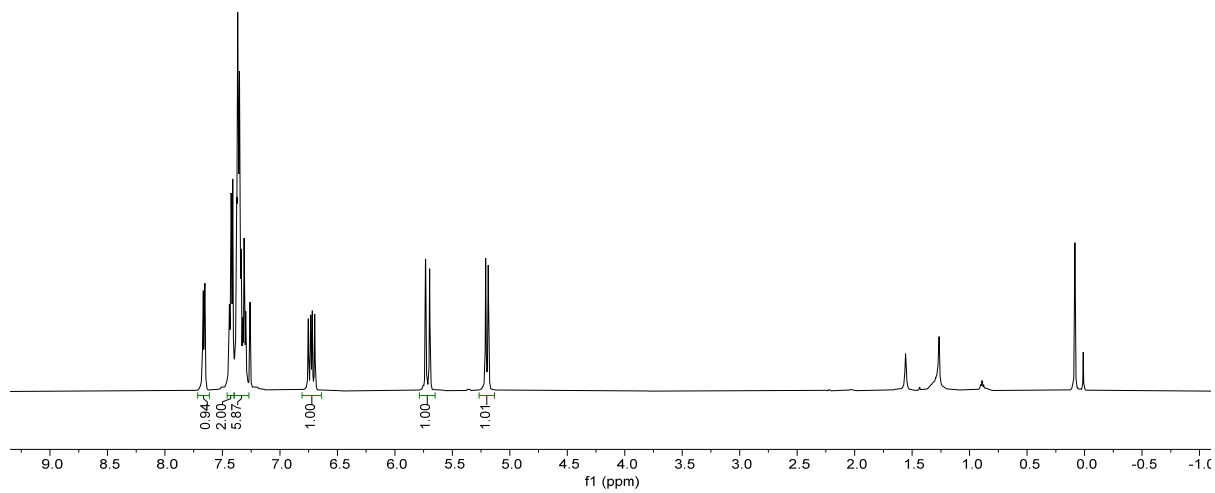

140.97  
136.03  
135.85  
130.25  
129.95  
128.16  
127.80  
127.61  
127.15  
125.62  
114.80

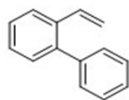

<sup>13</sup>C{<sup>1</sup>H} NMR (126 MHz, CDCl<sub>3</sub>)

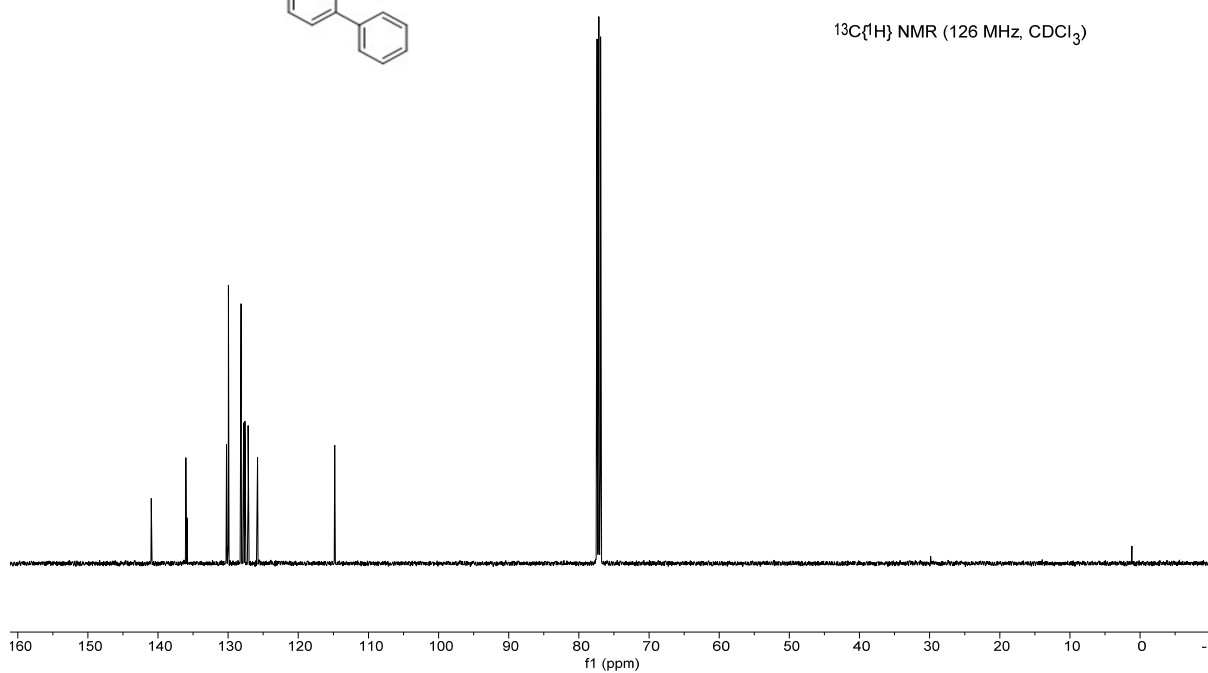

Supplement: d4ob01790k1.pdf [file d4ob01790k1.pdf]
